# Supplementary material for: ATP binding facilitates target search of SWR1 chromatin remodeler by promoting one-dimensional diffusion on DNA
Source: eLife journal article supplement (doi:10.7554/elife.77352), 2022-07-25

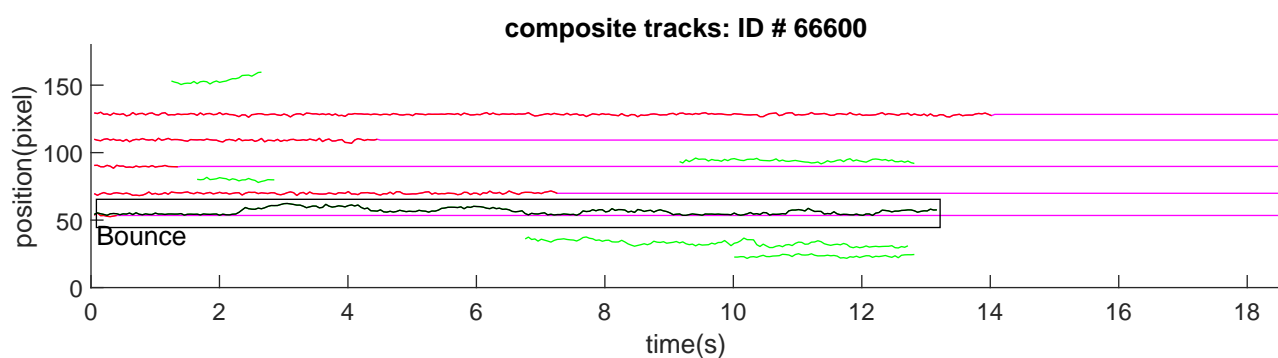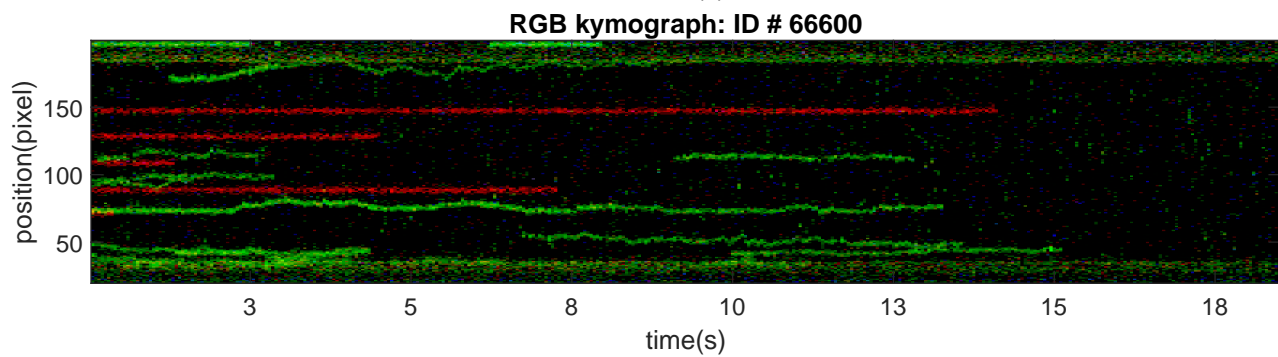

composite tracks: ID # 342180

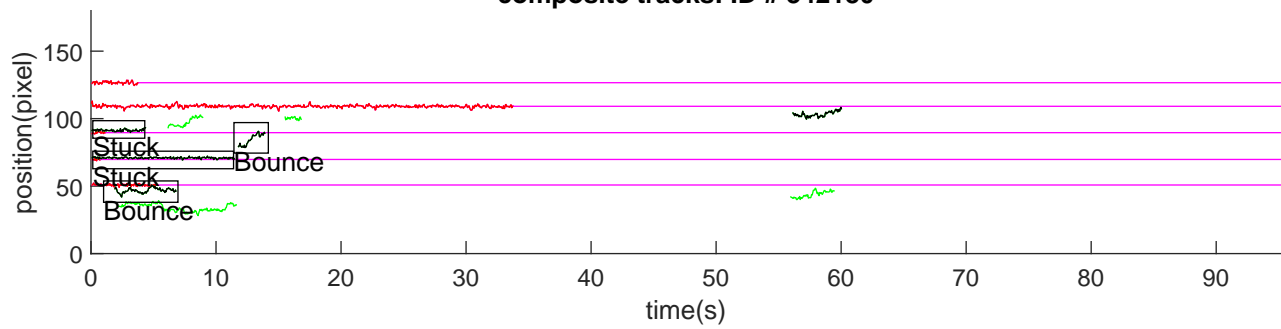

RGB kymograph: ID # 342180

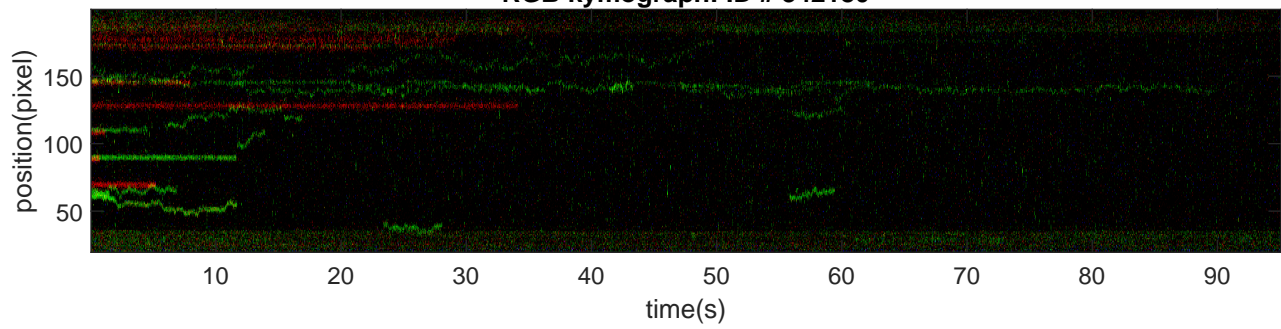

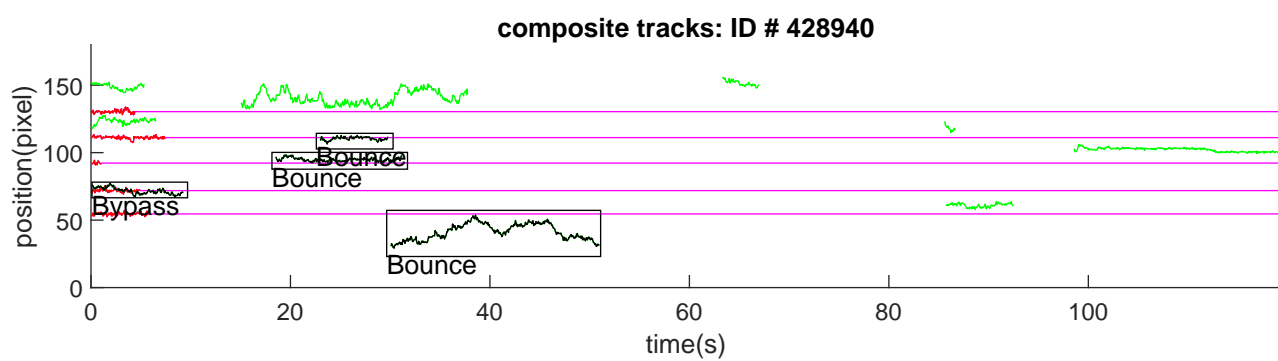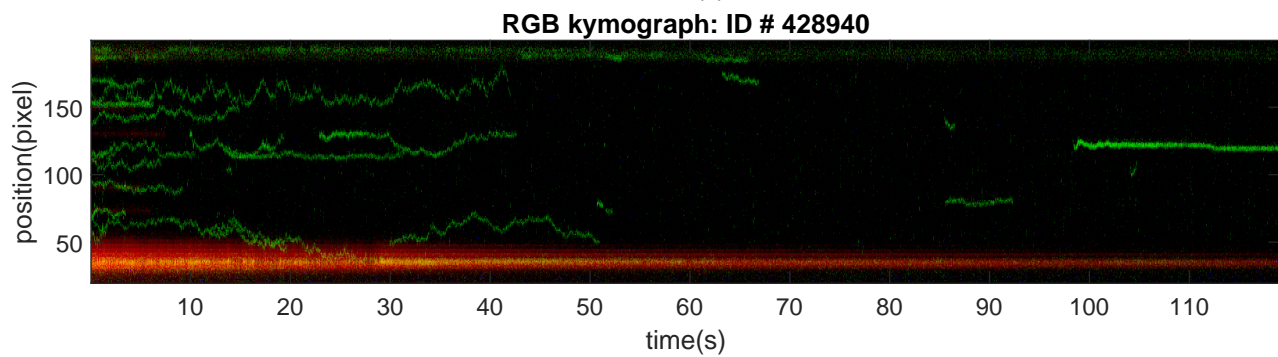

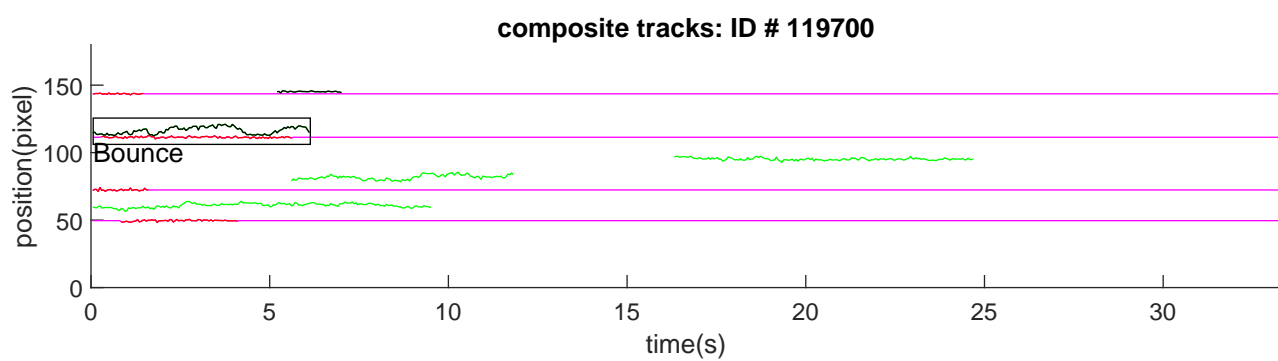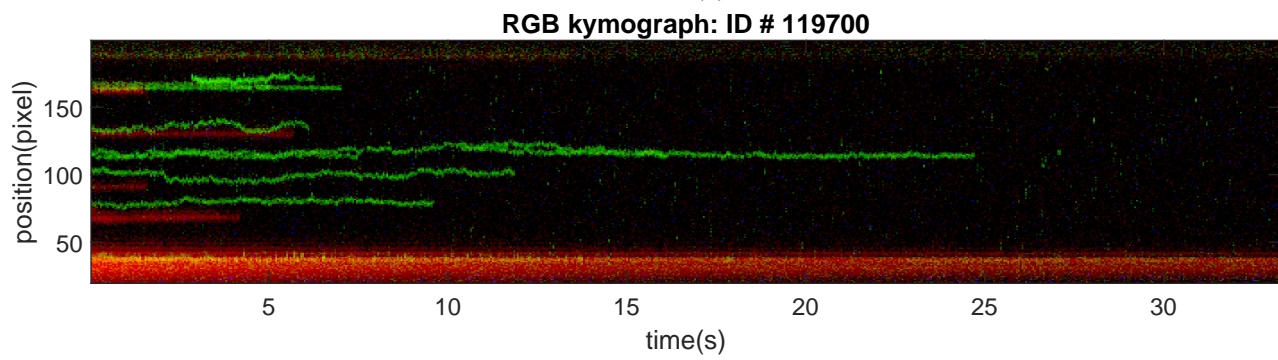



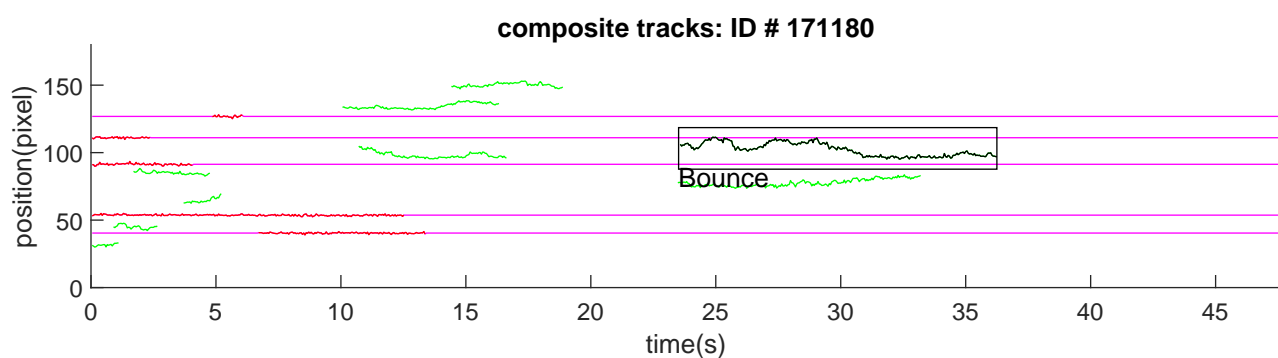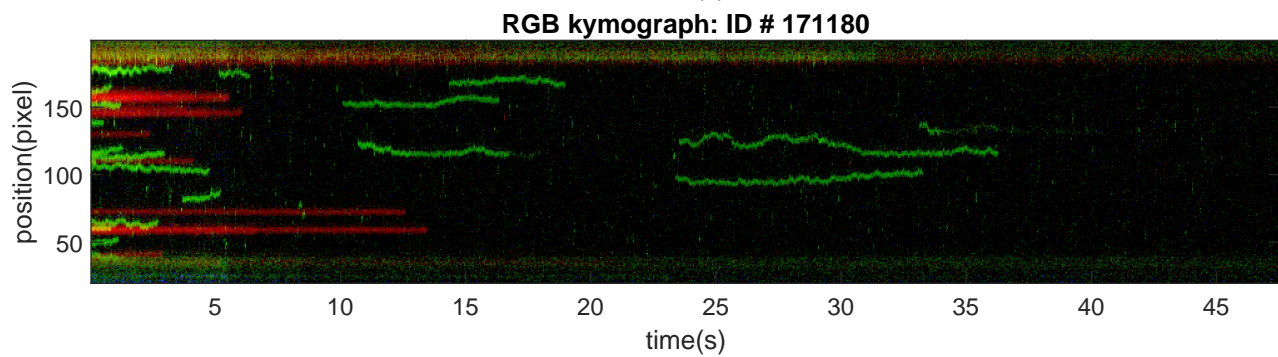

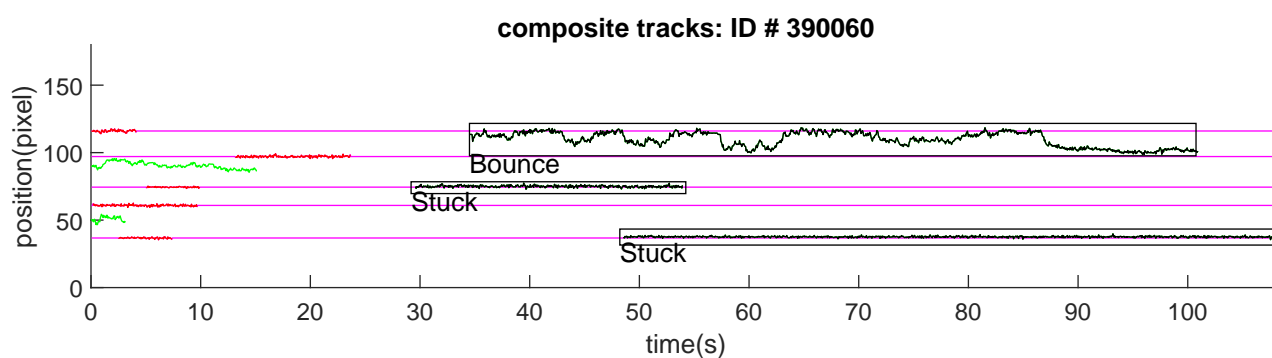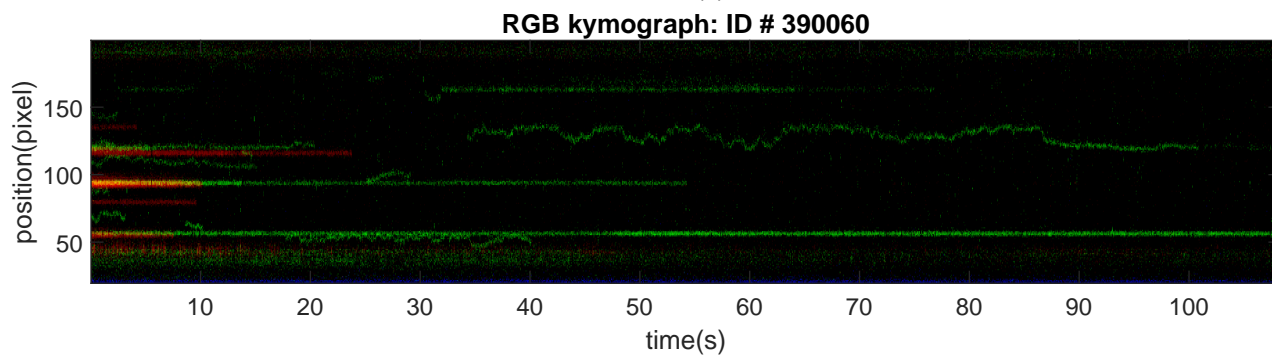

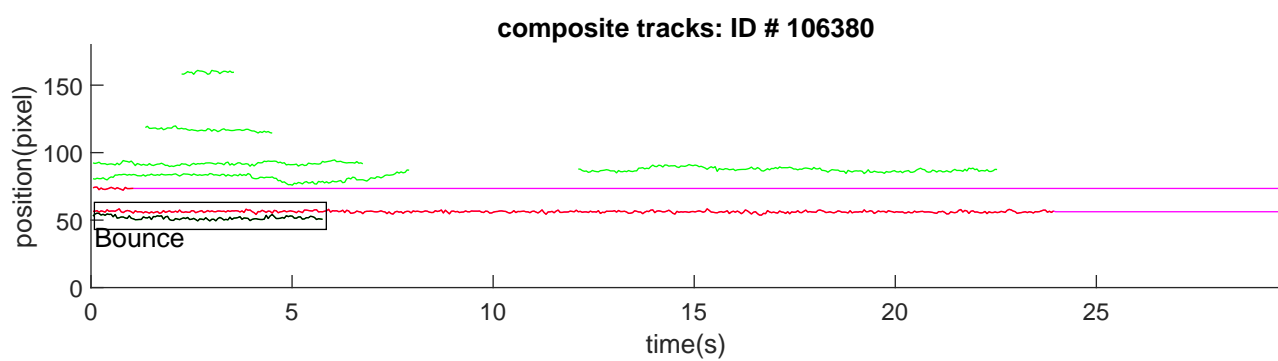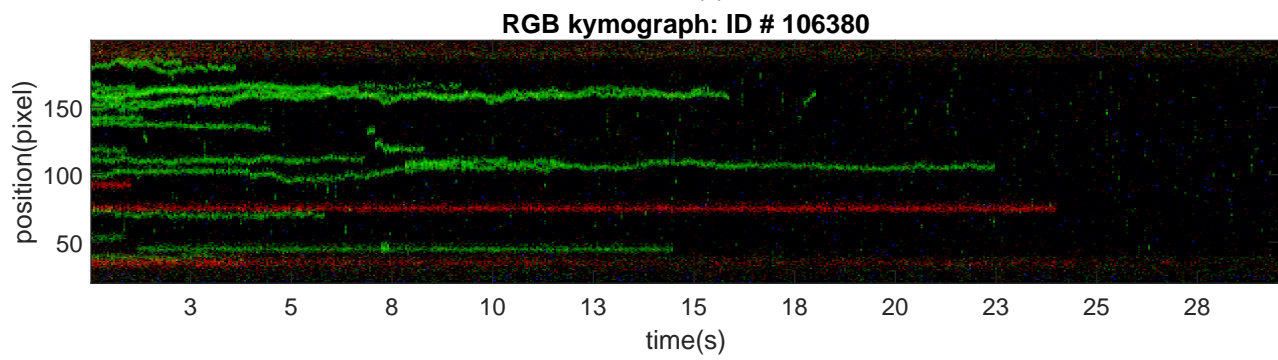

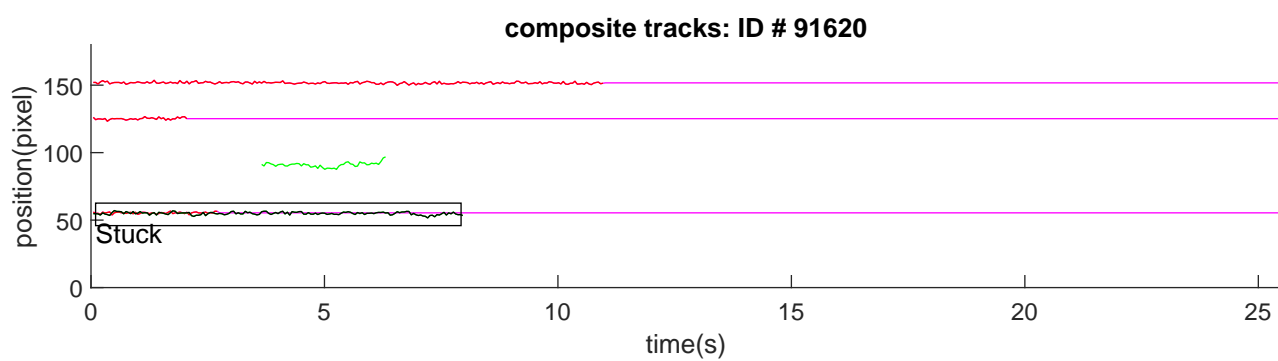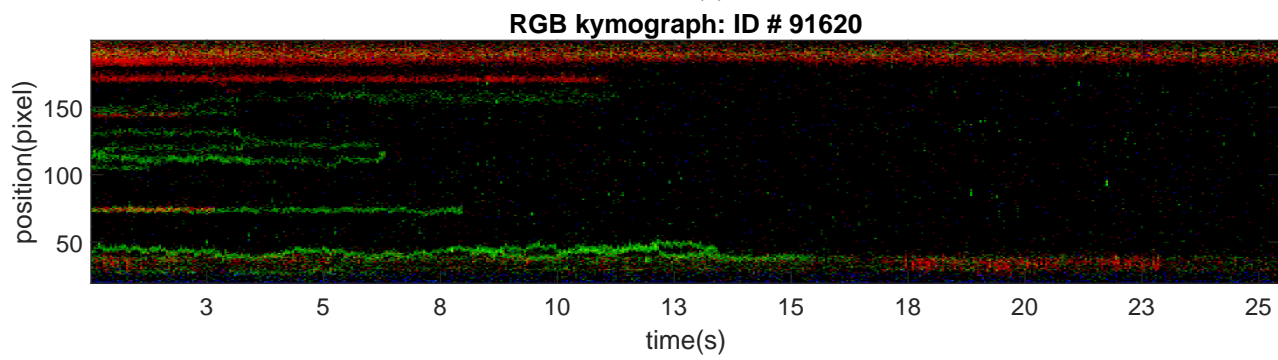

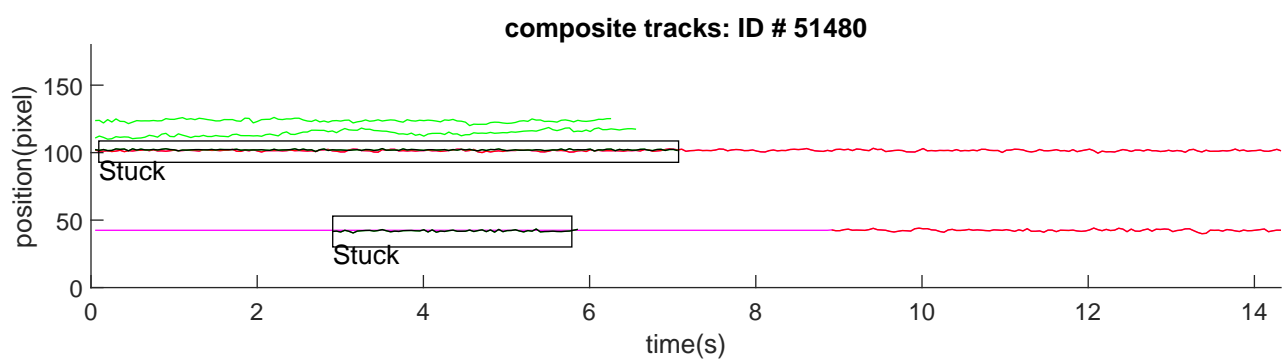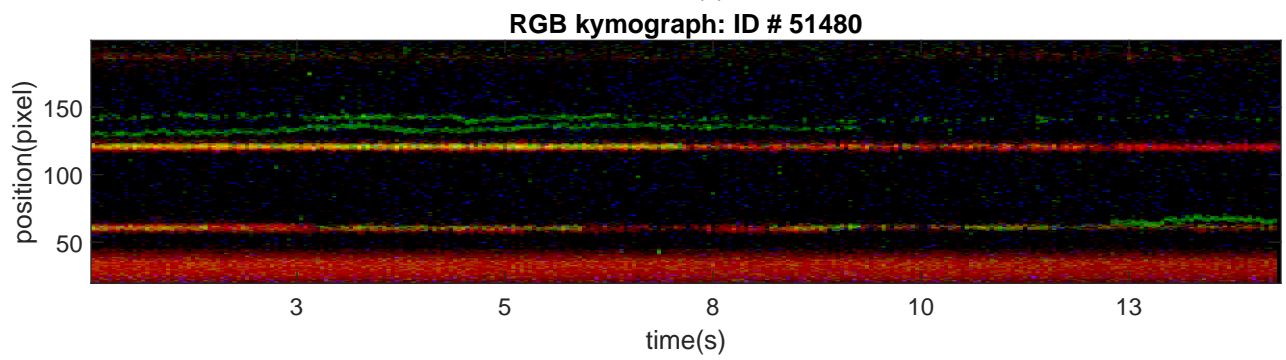

composite tracks: ID # 133740

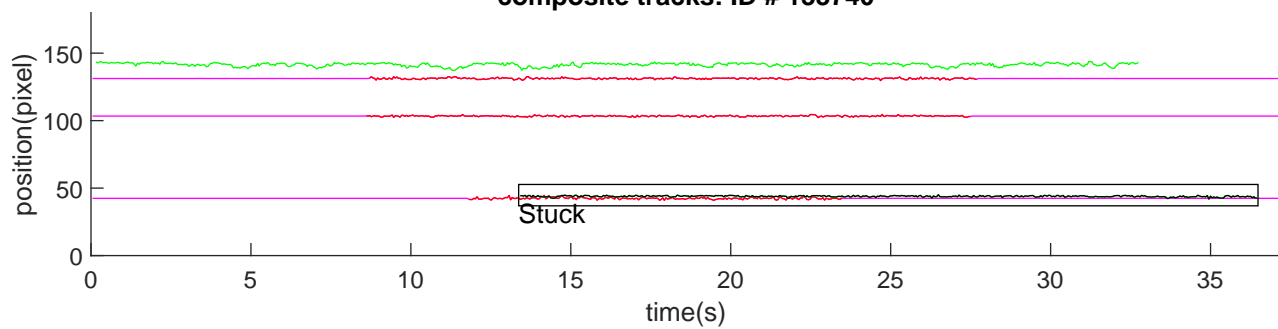

RGB kymograph: ID # 133740

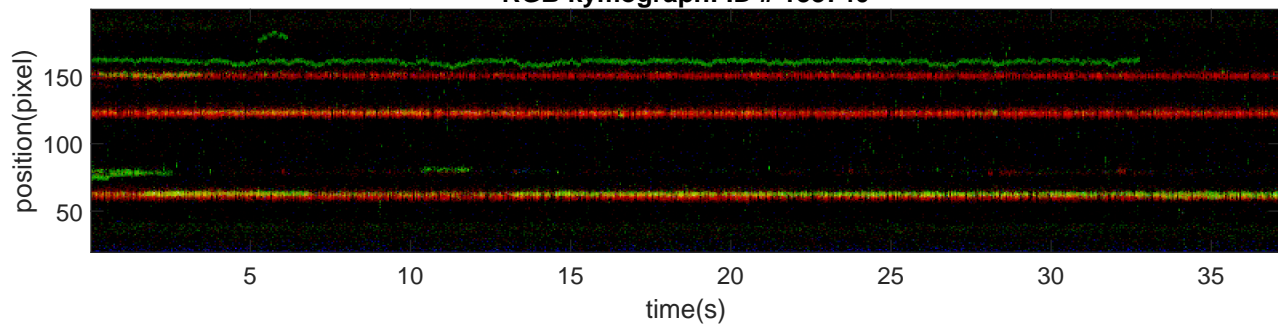

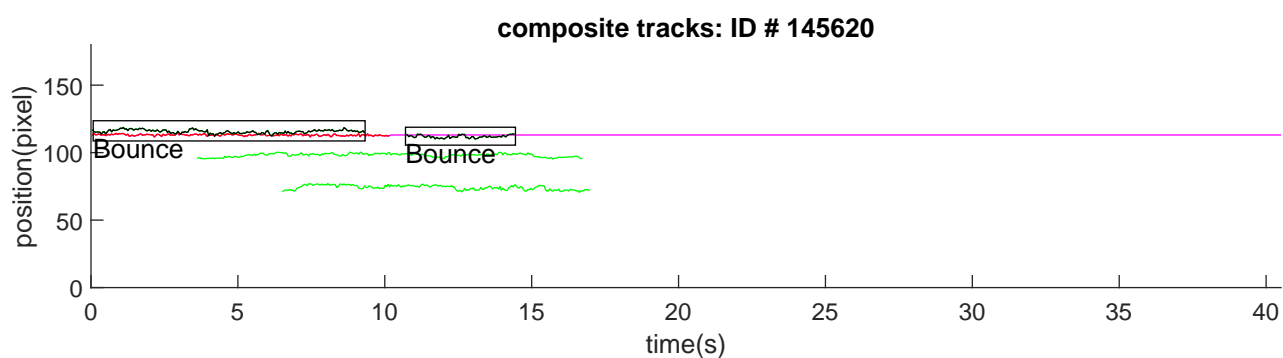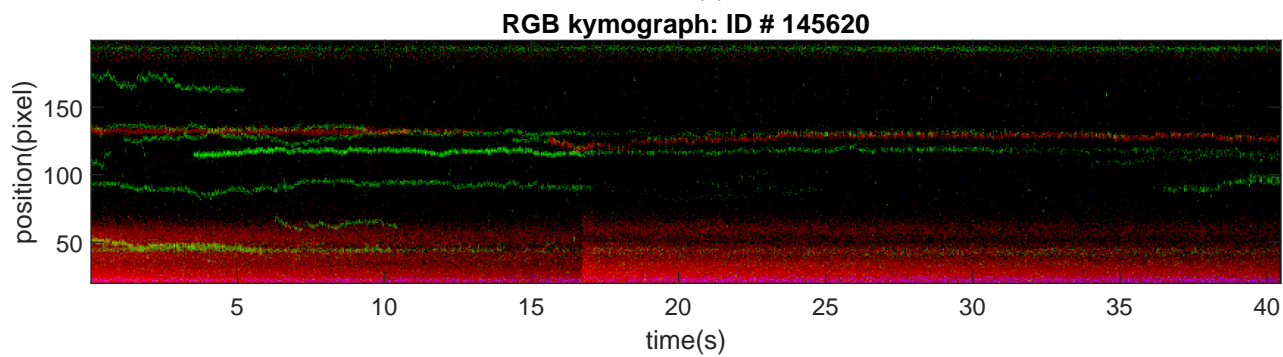

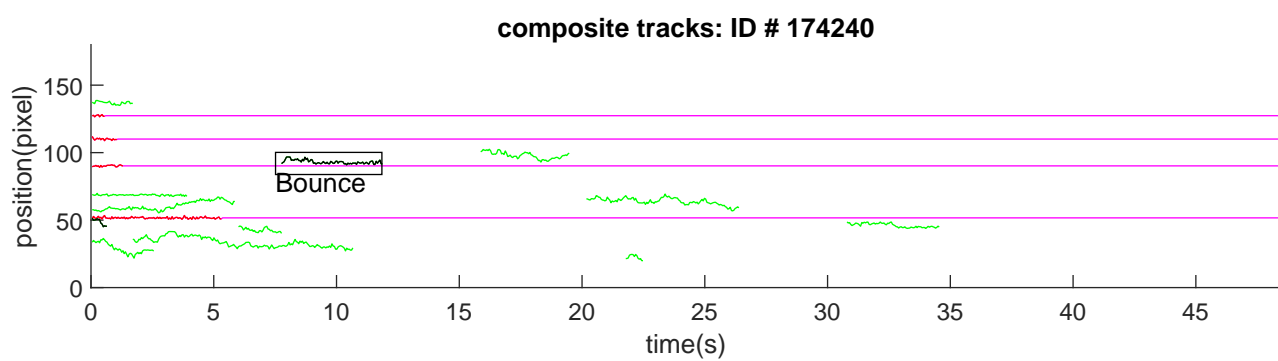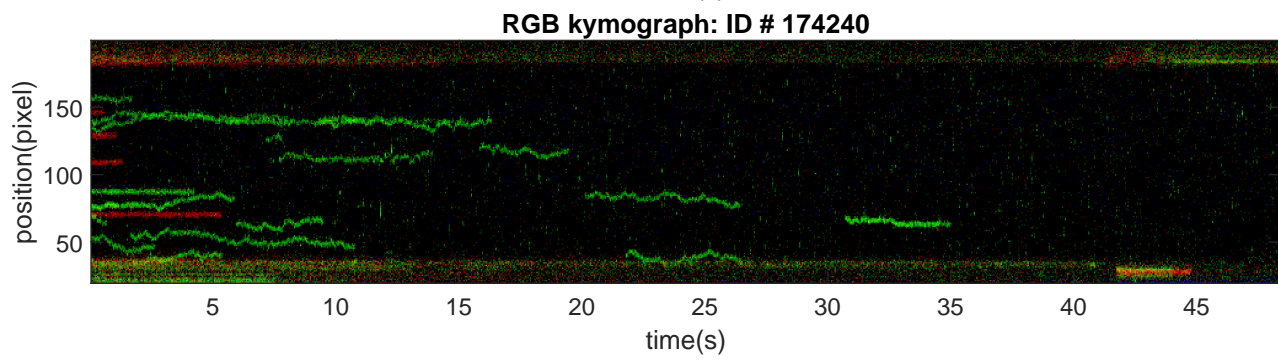



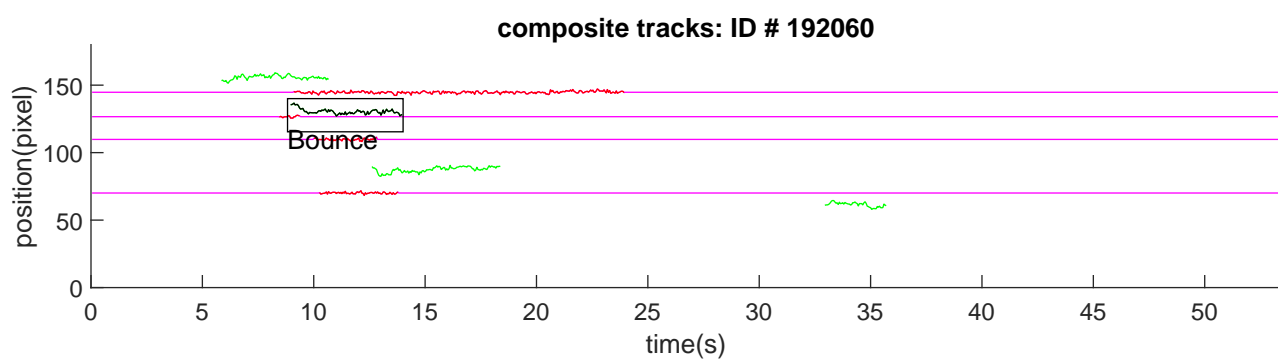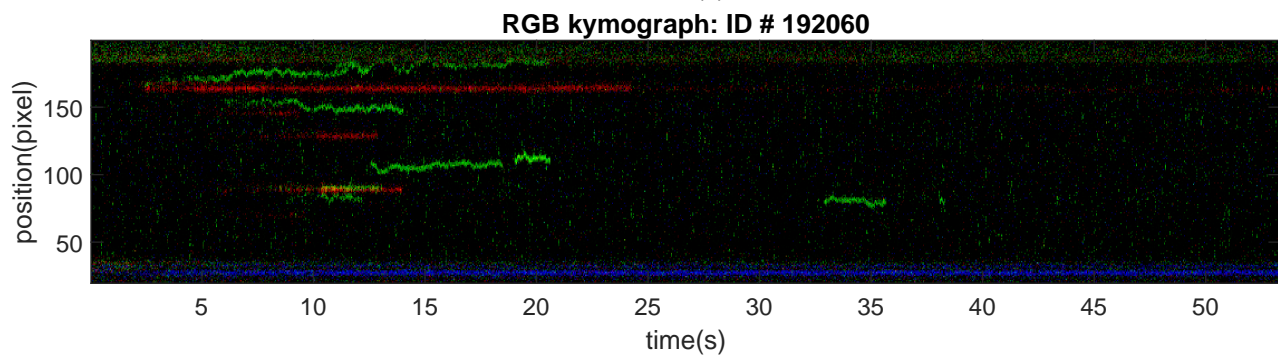

composite tracks: ID # 193860

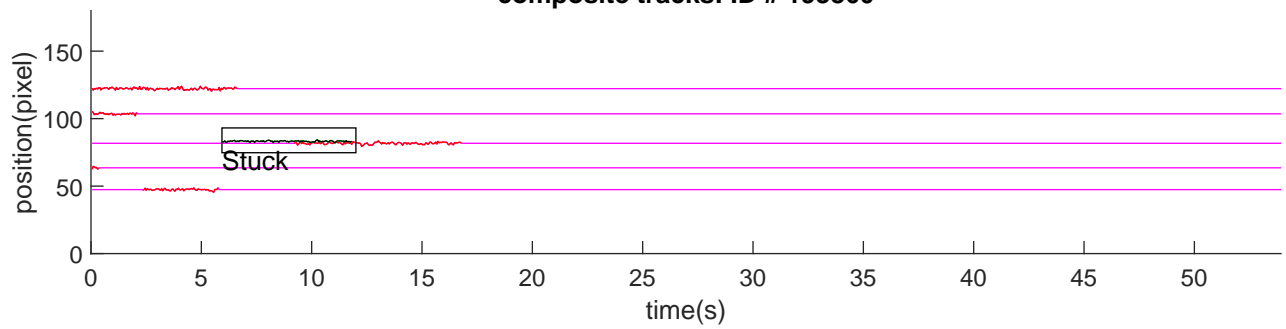

RGB kymograph: ID # 193860

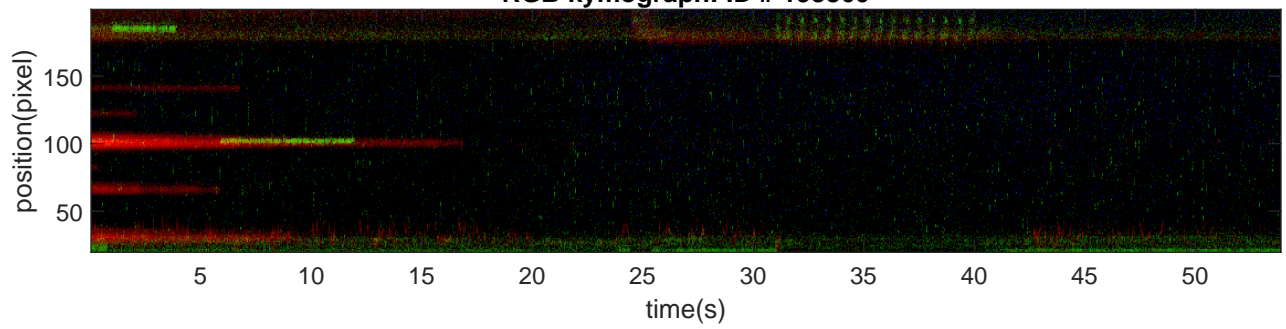

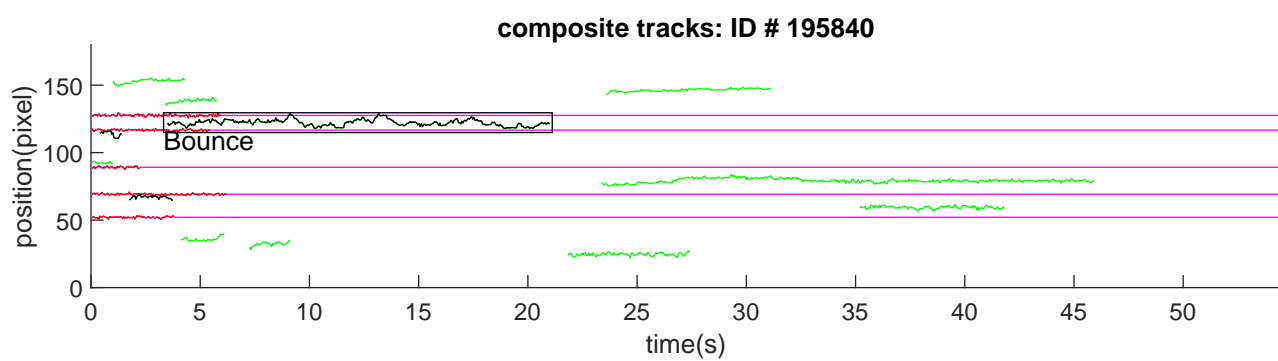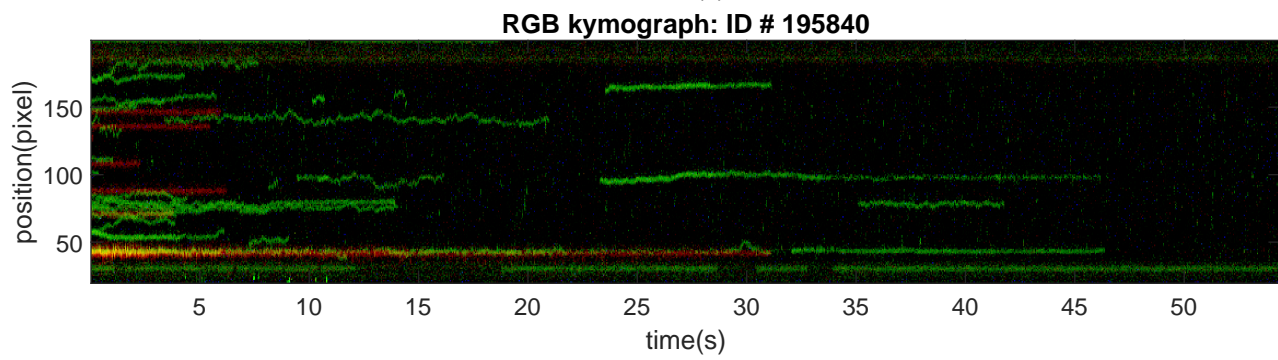

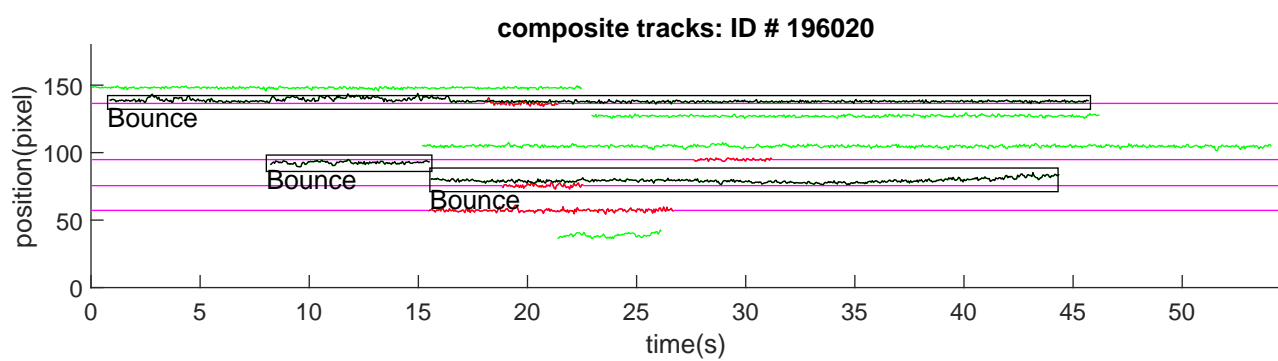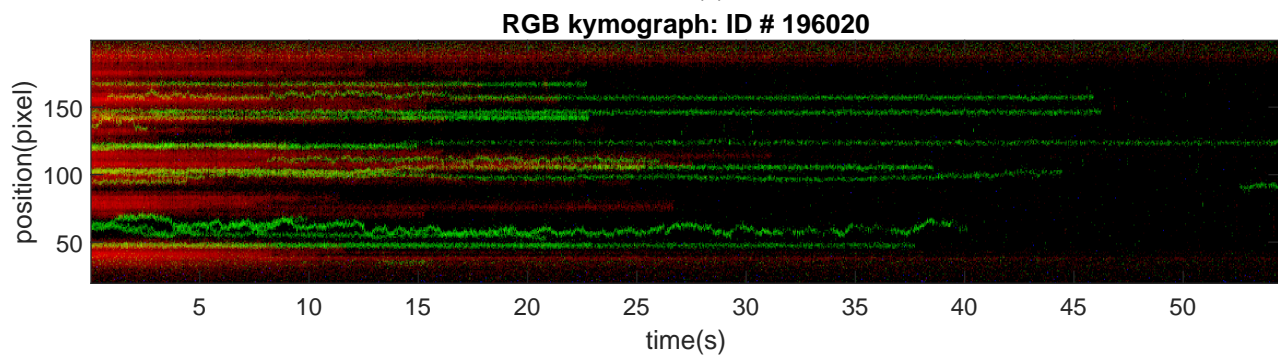

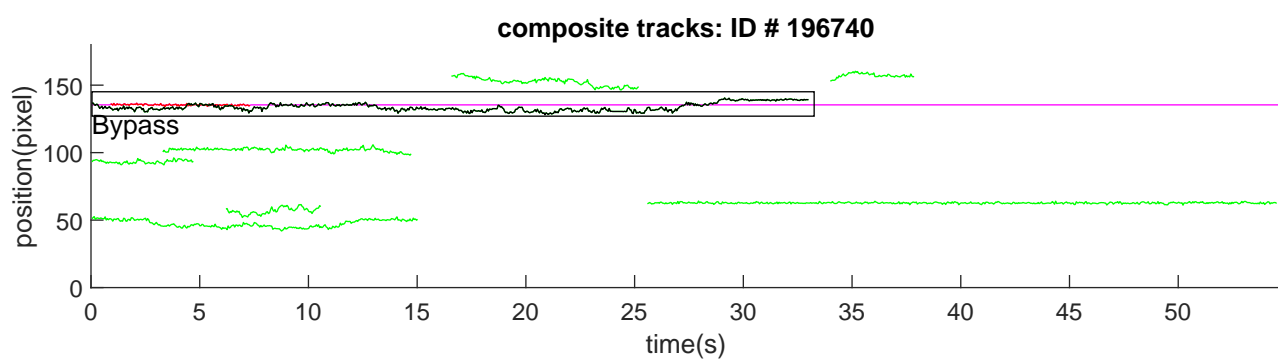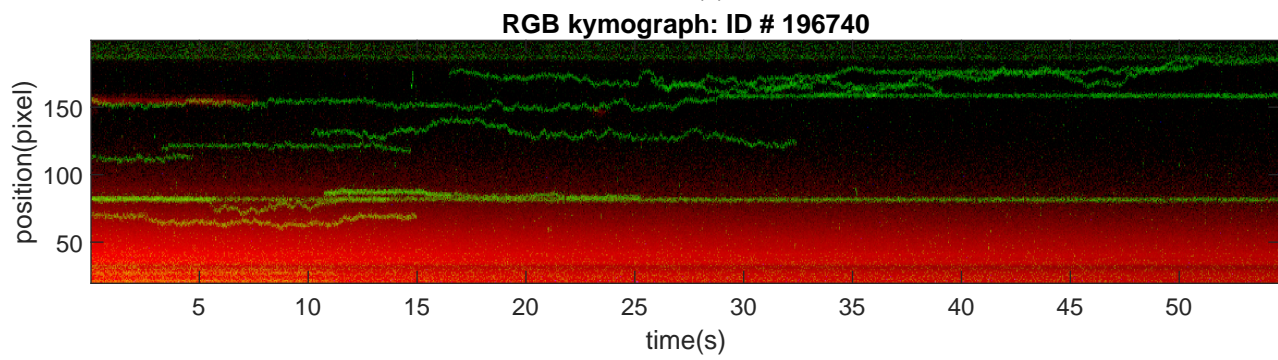

**composite tracks: ID # 200340**

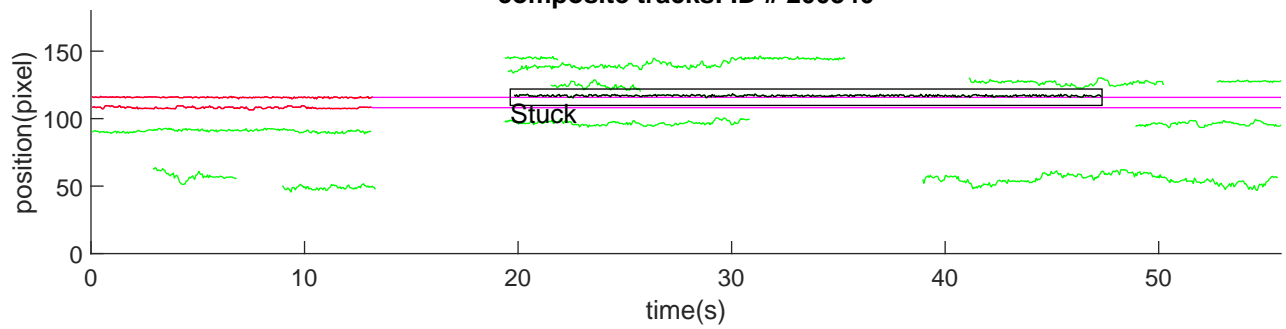

**RGB kymograph: ID # 200340**

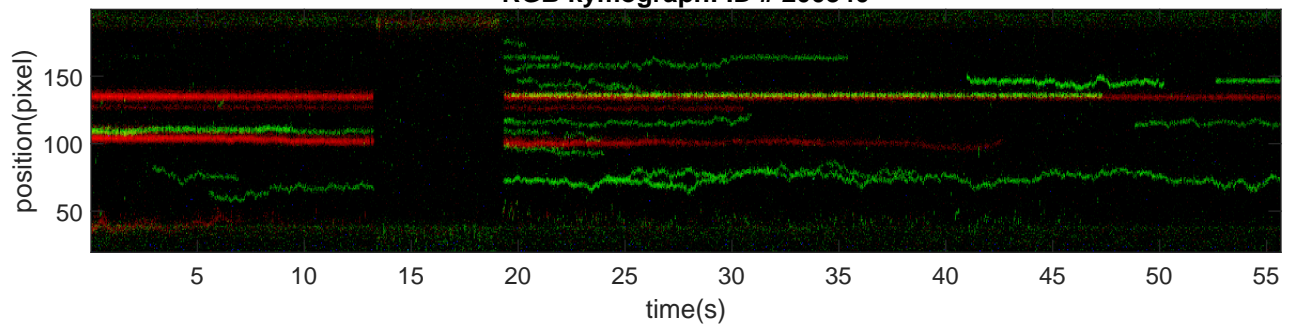

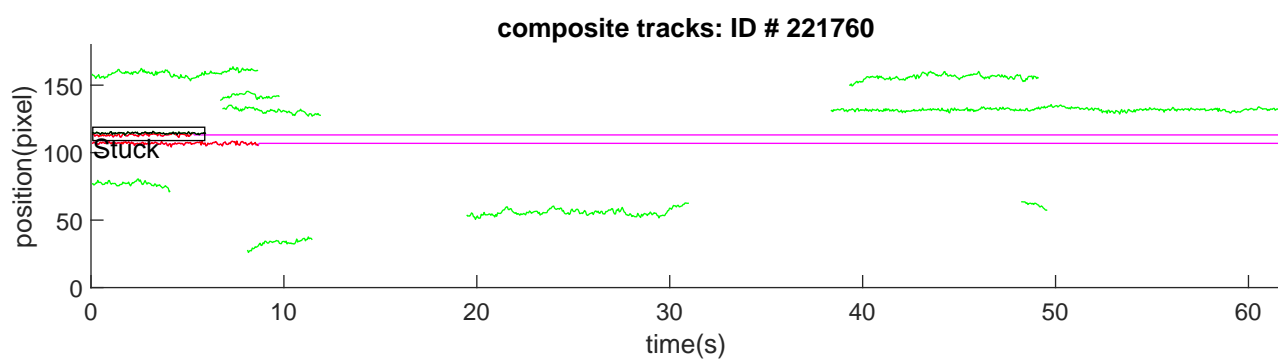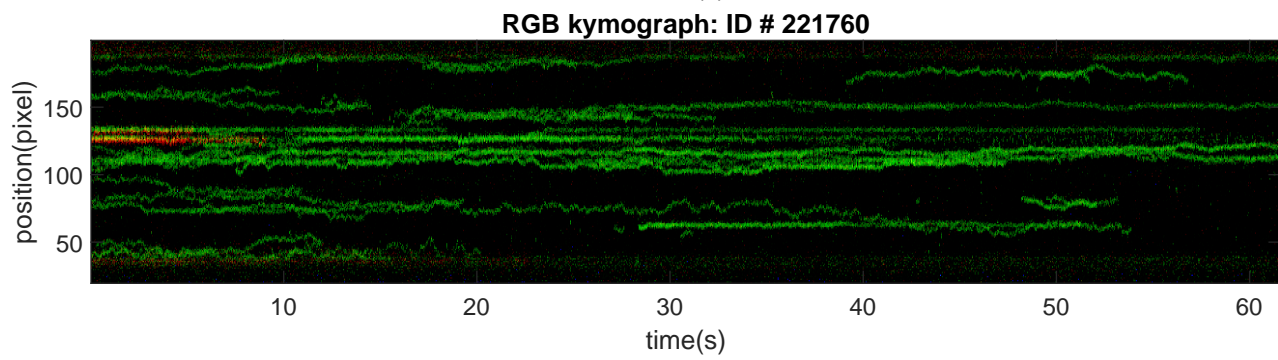

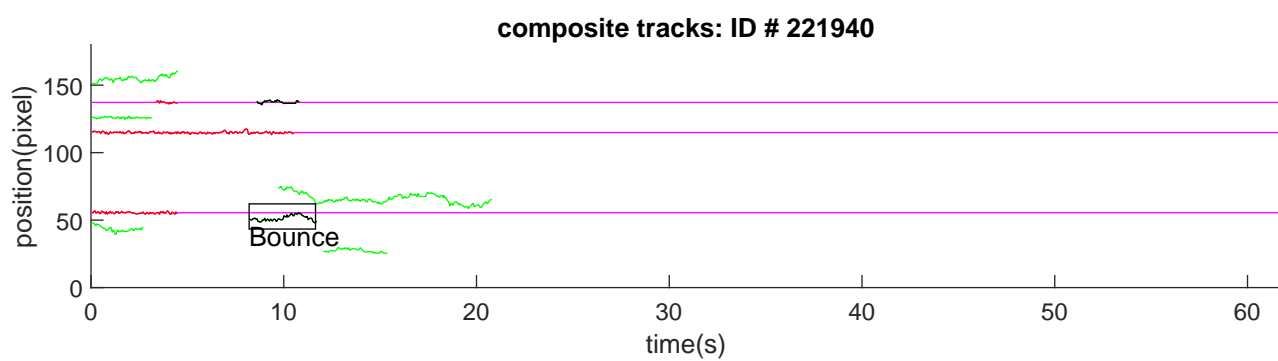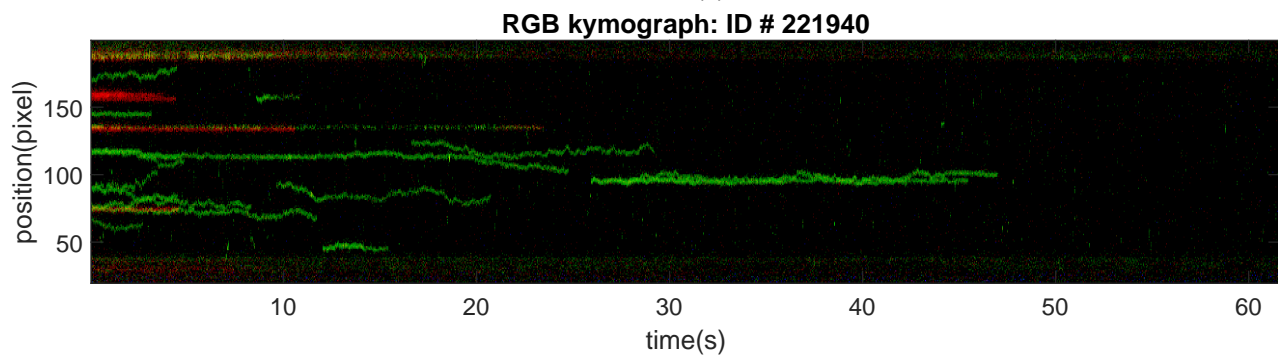



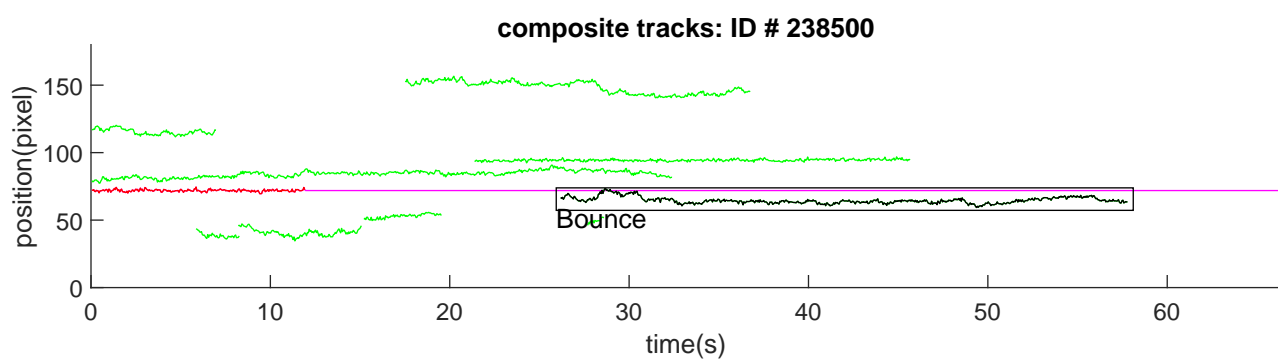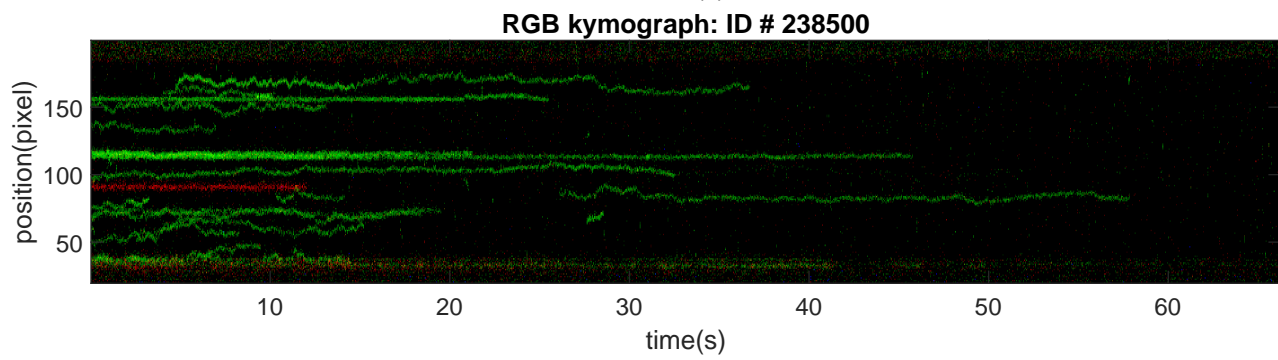

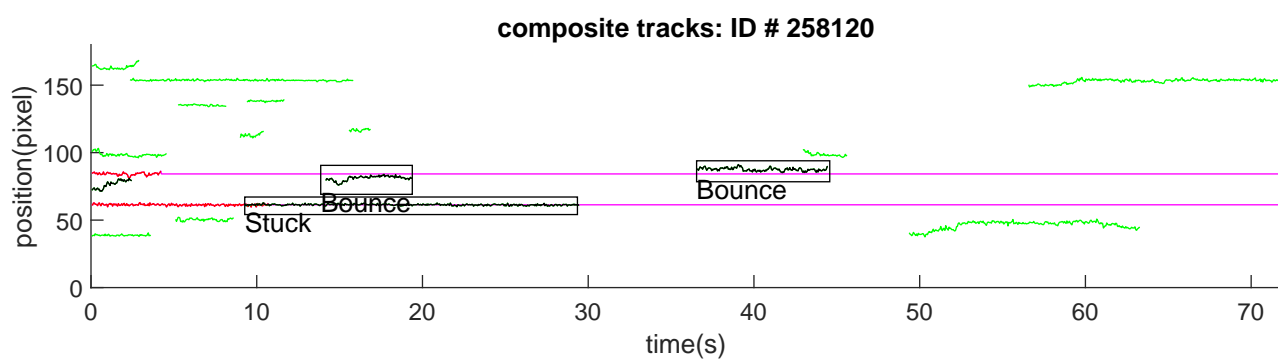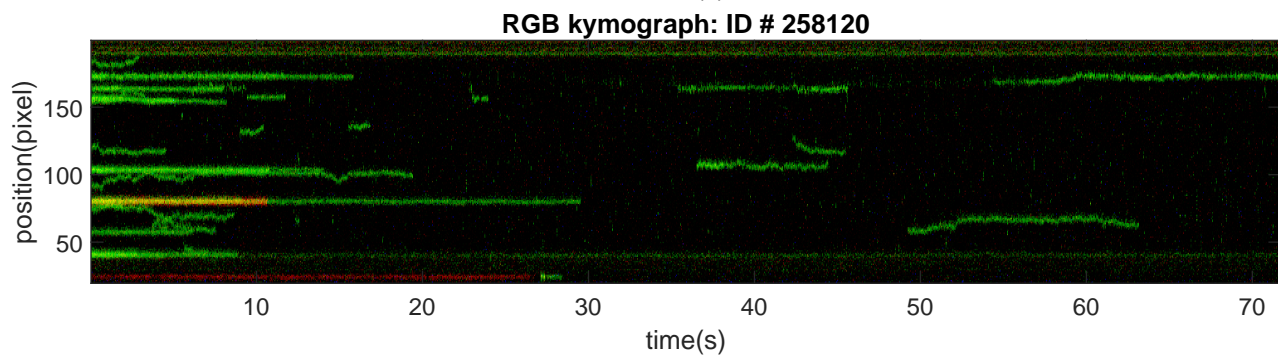

composite tracks: ID # 261360

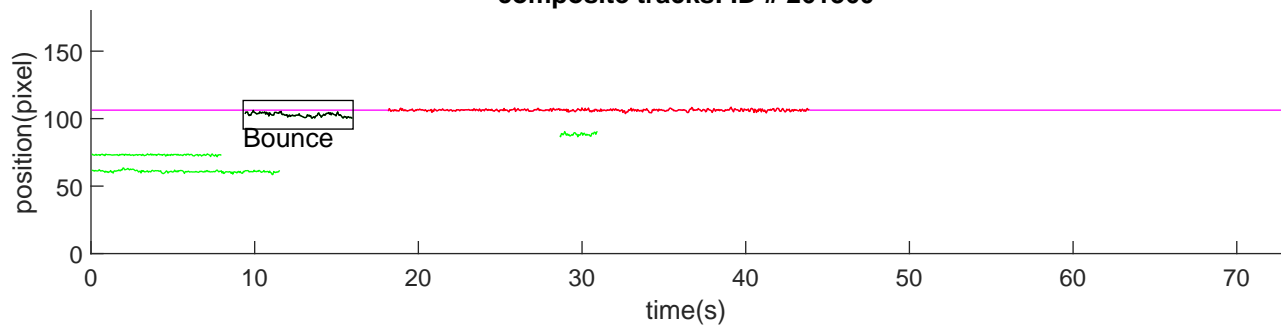

RGB kymograph: ID # 261360

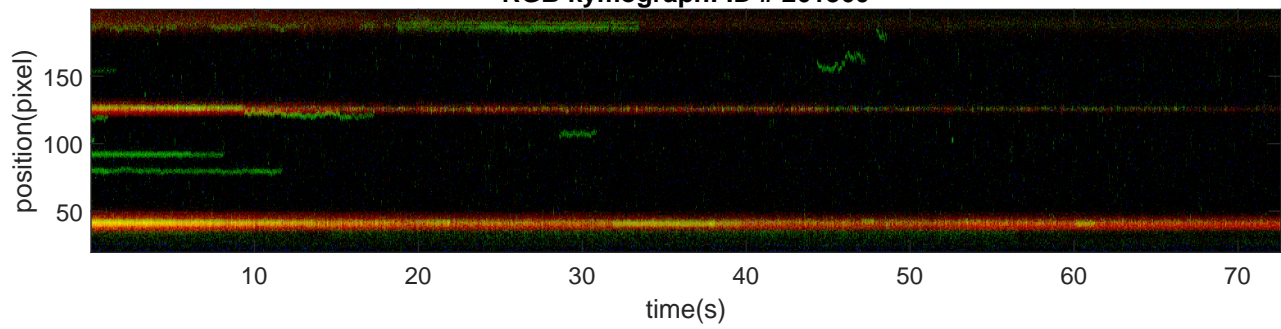

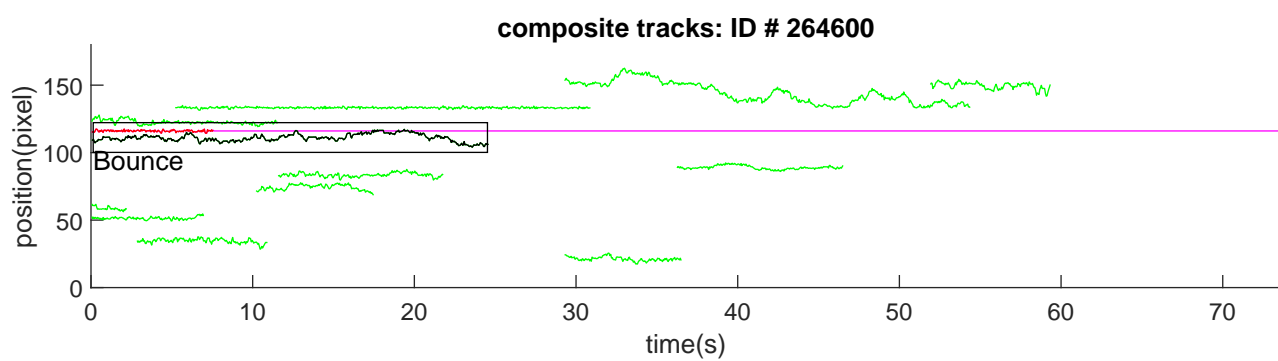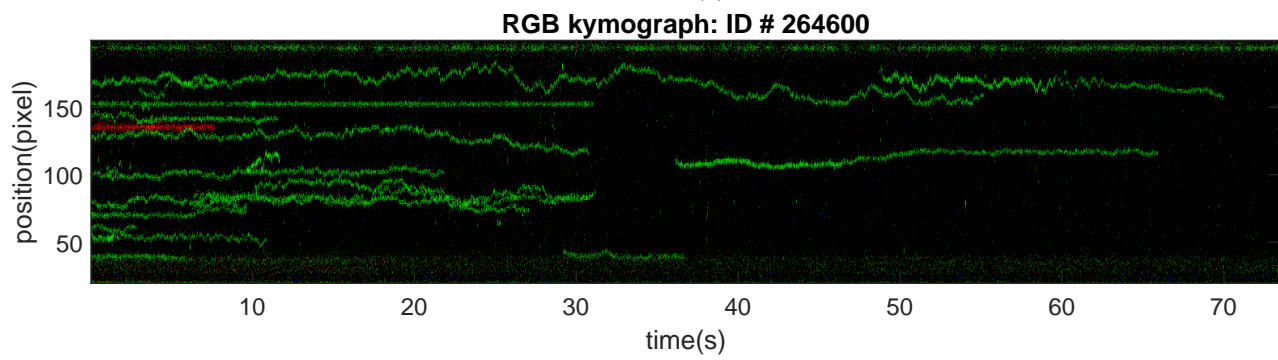

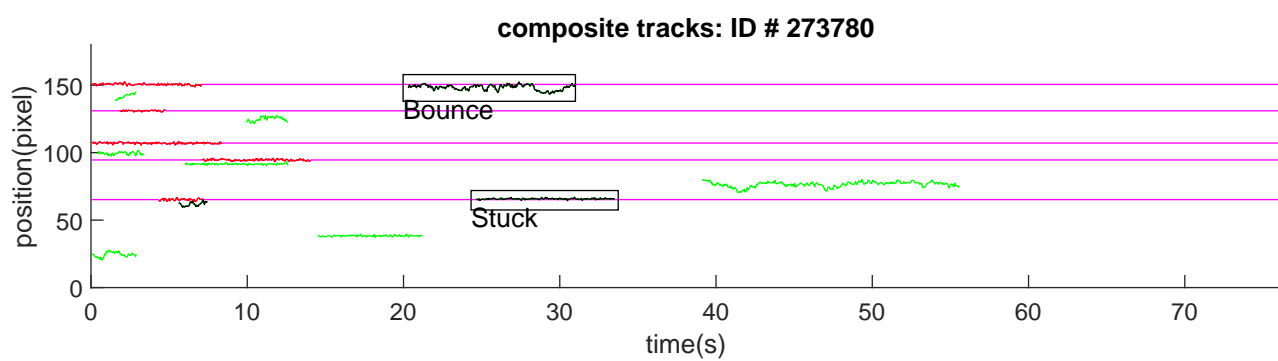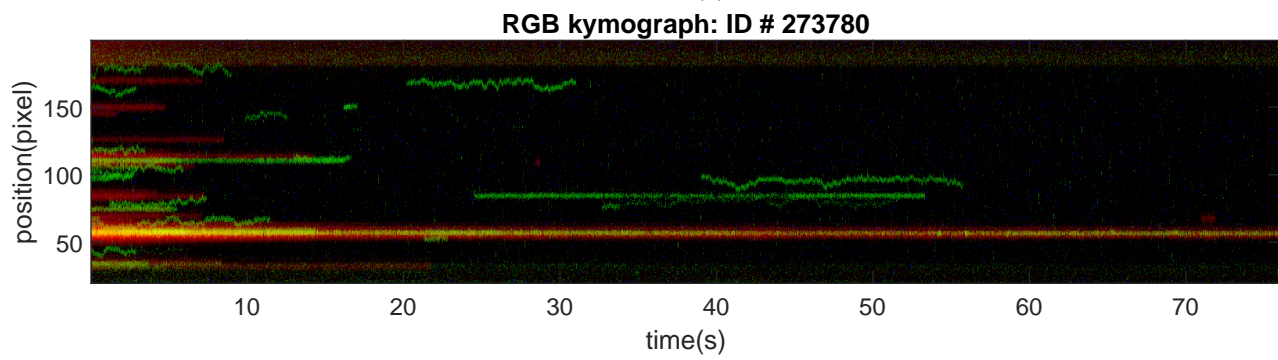

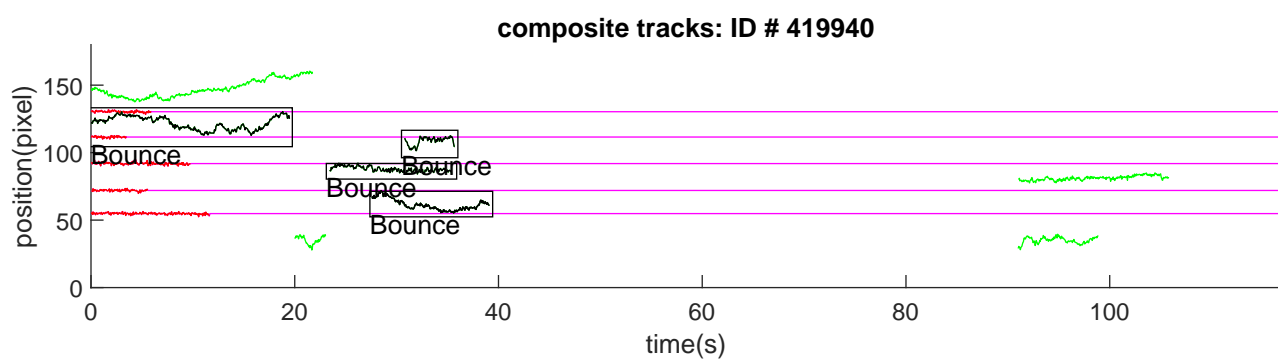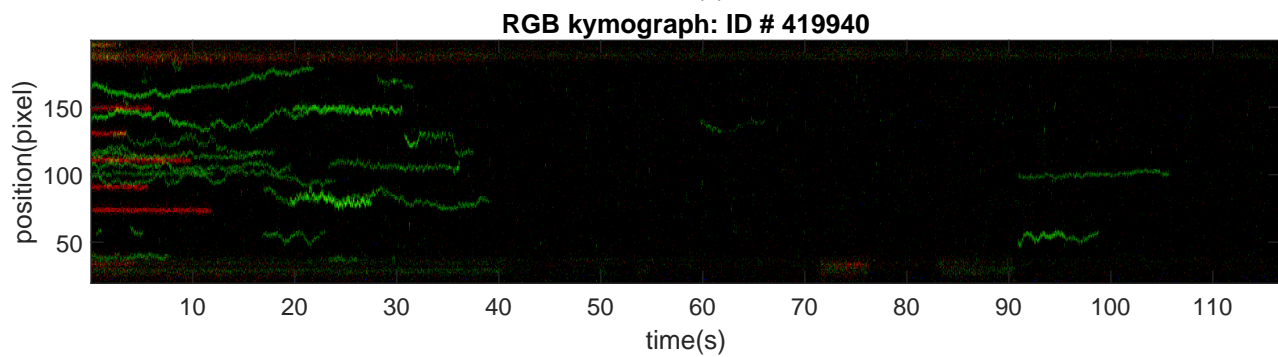

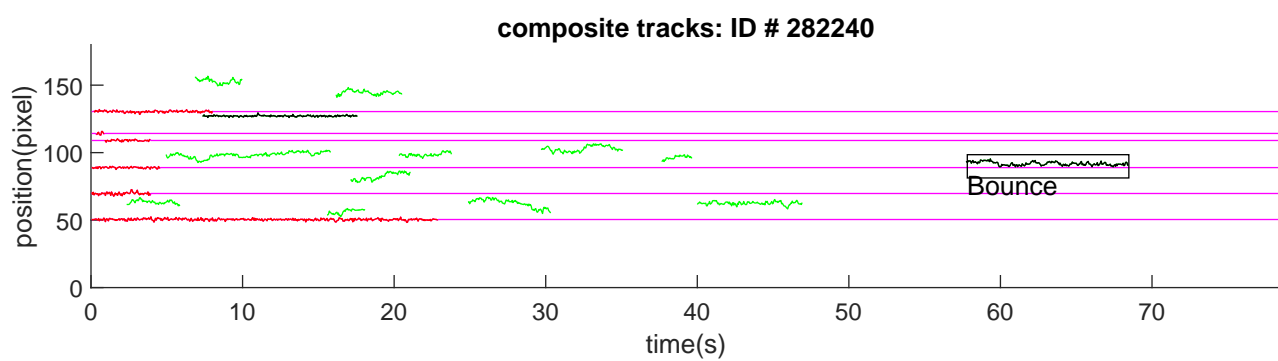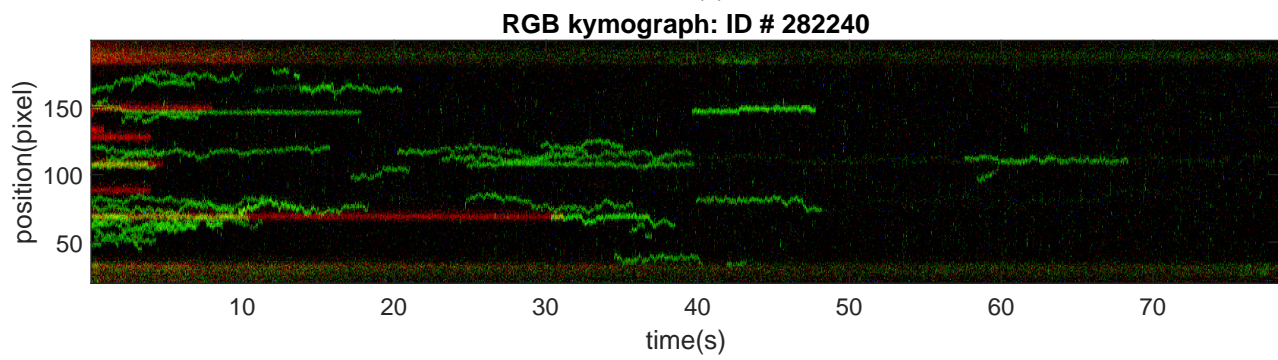

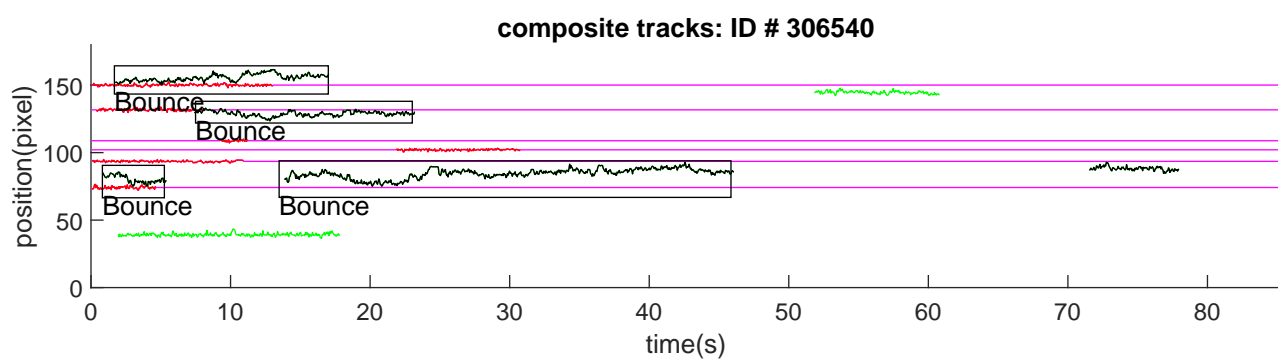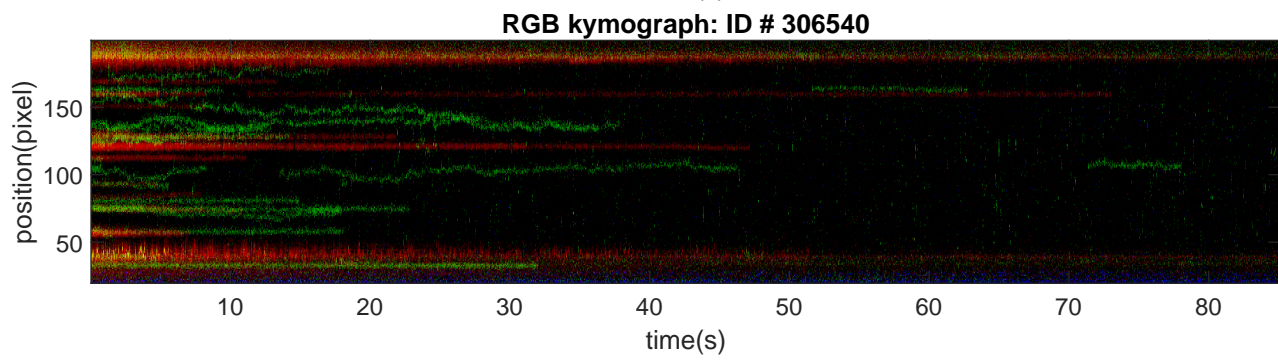



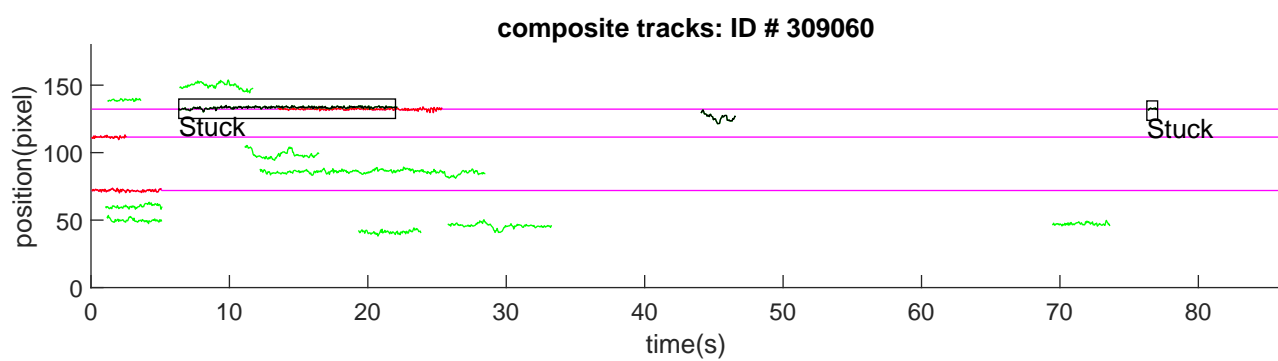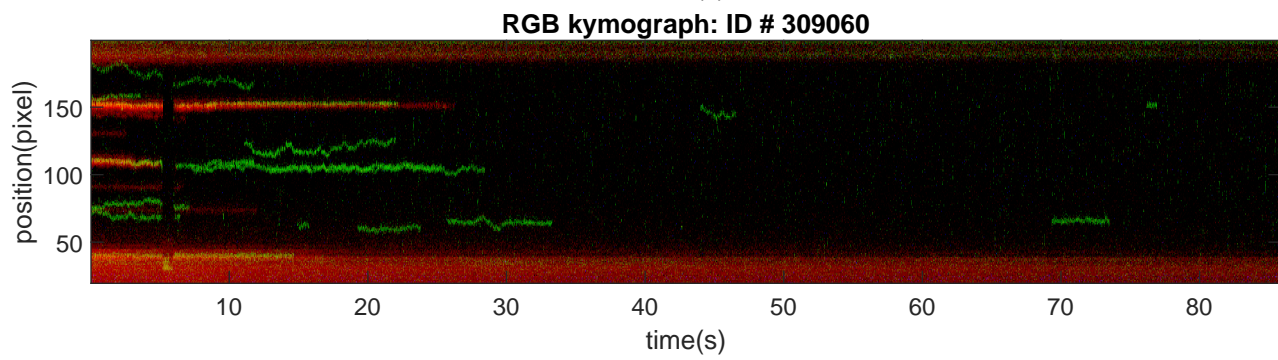

composite tracks: ID # 310680

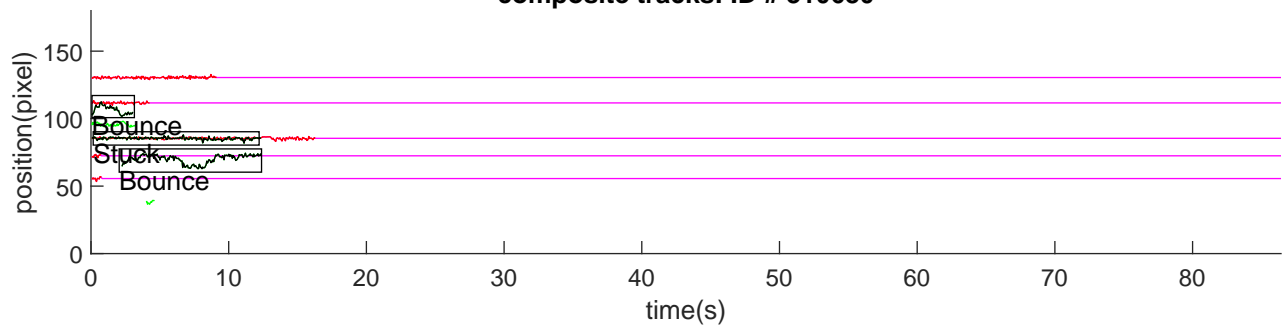

RGB kymograph: ID # 310680

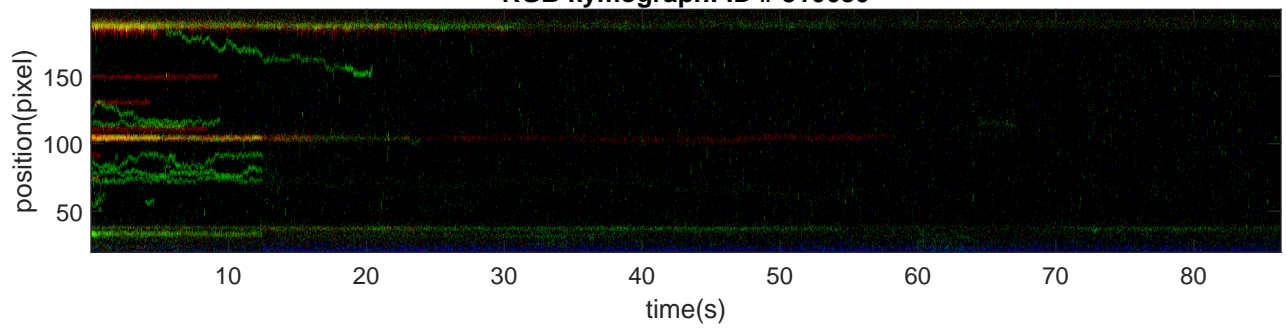

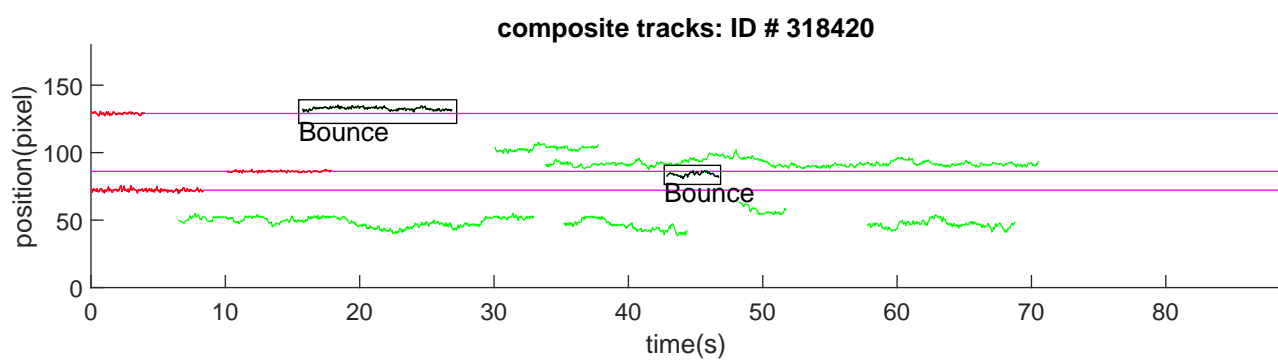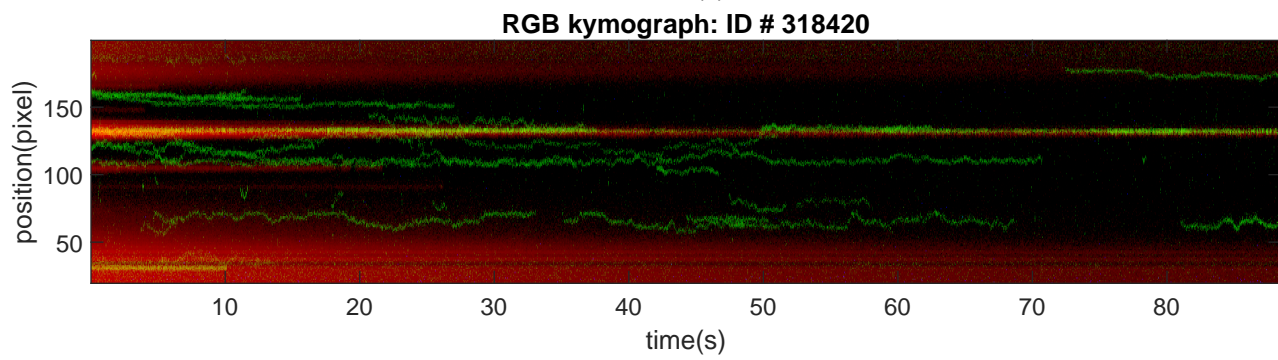

composite tracks: ID # 261180

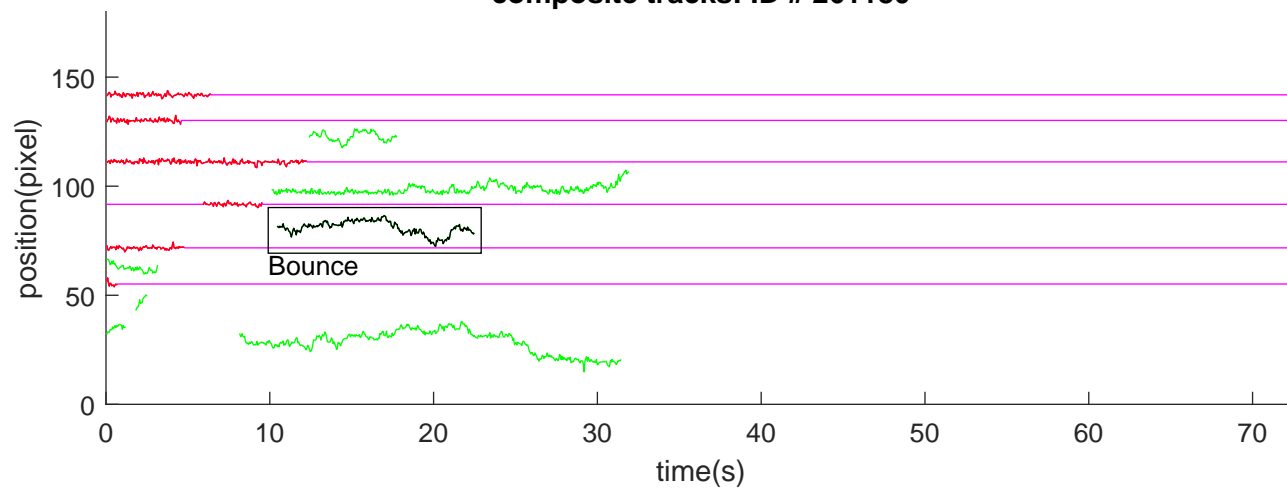

RGB kymograph: ID # 261180

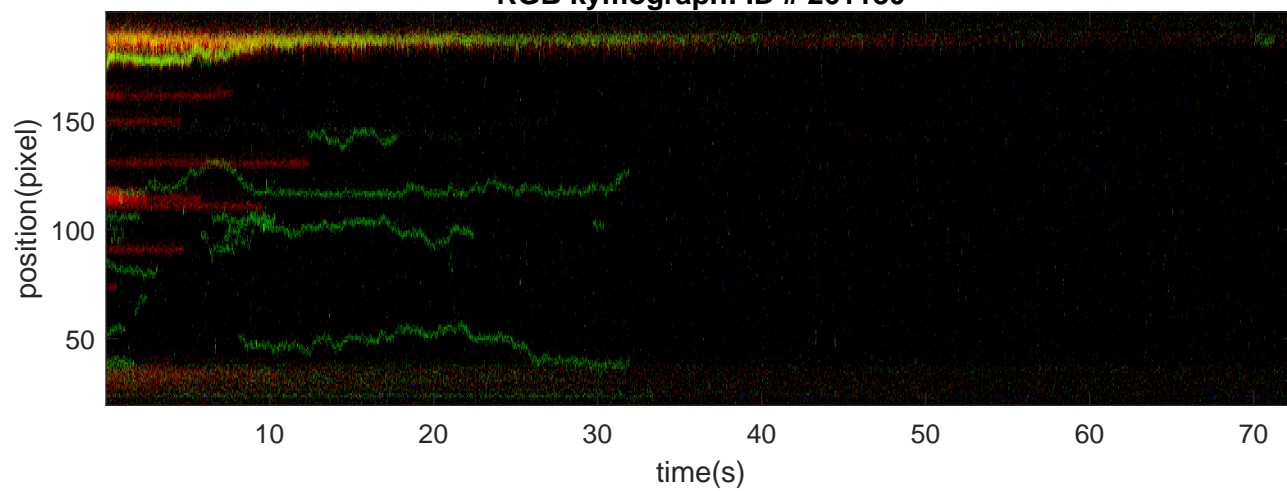

composite tracks: ID # 320220

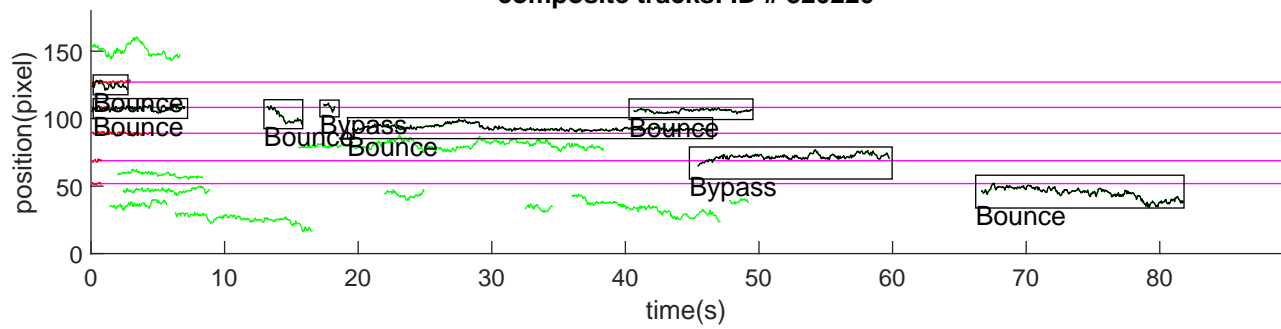

RGB kymograph: ID # 320220

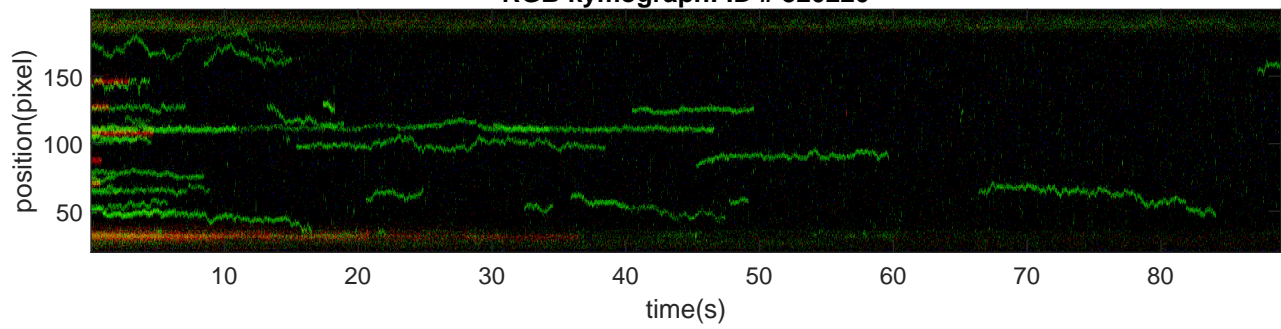

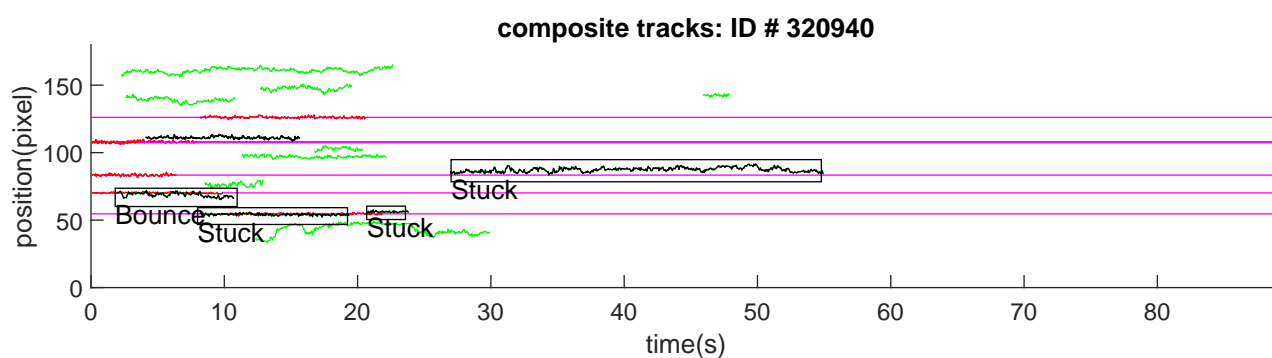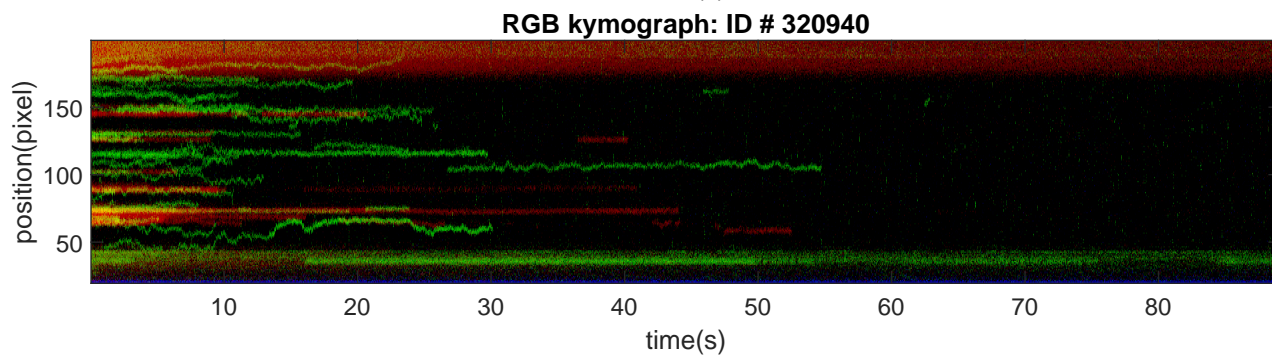

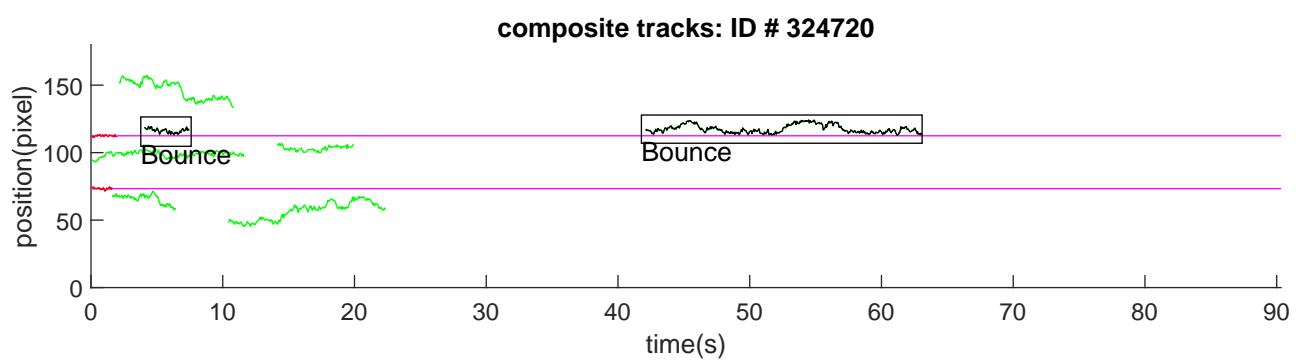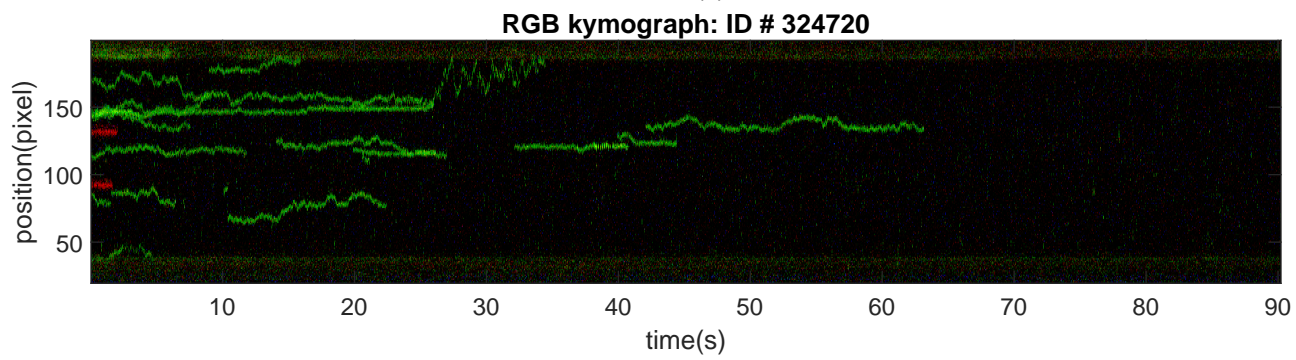

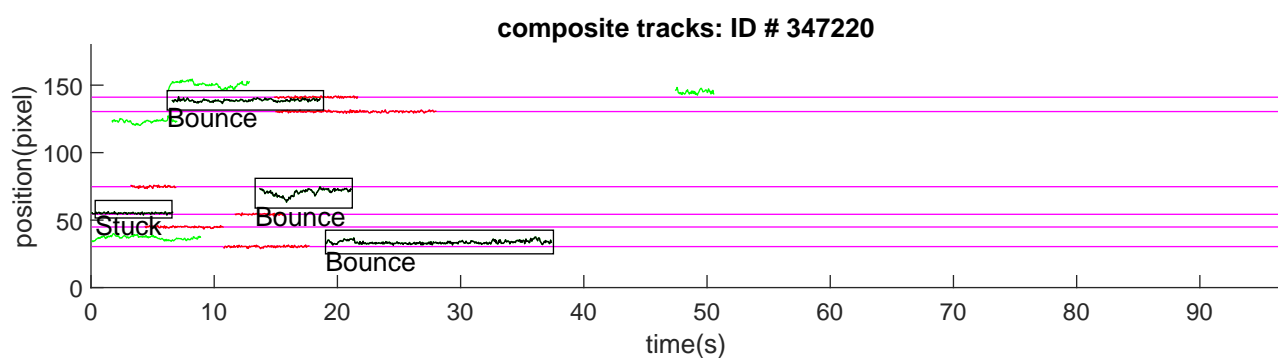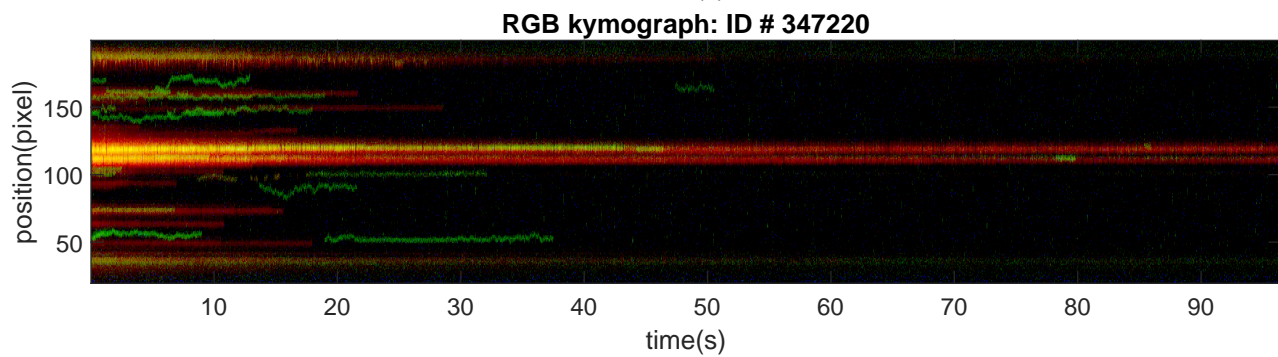



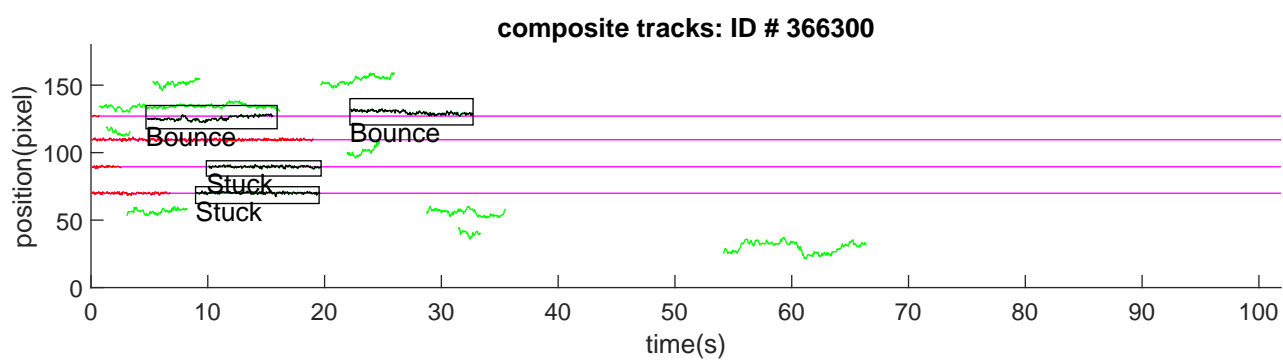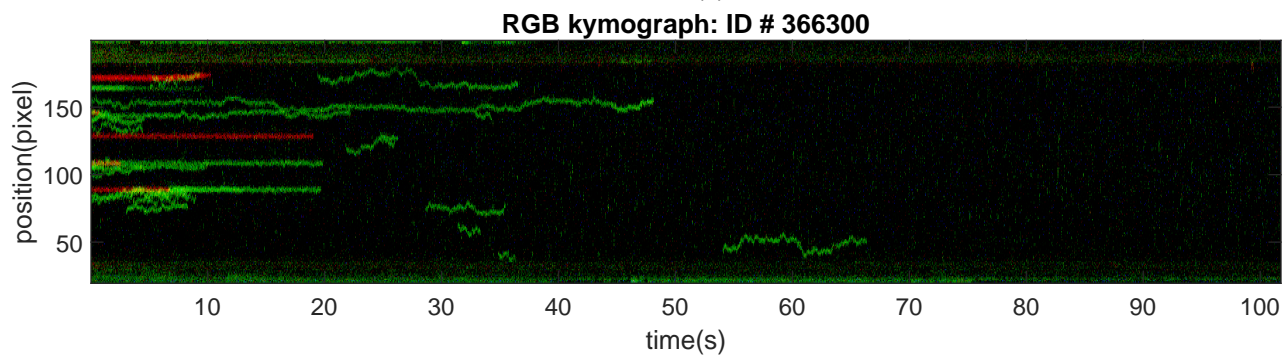

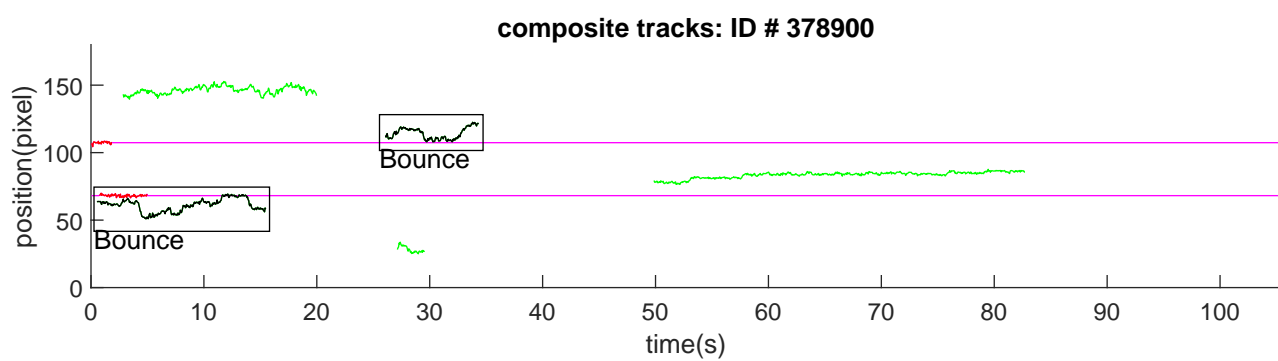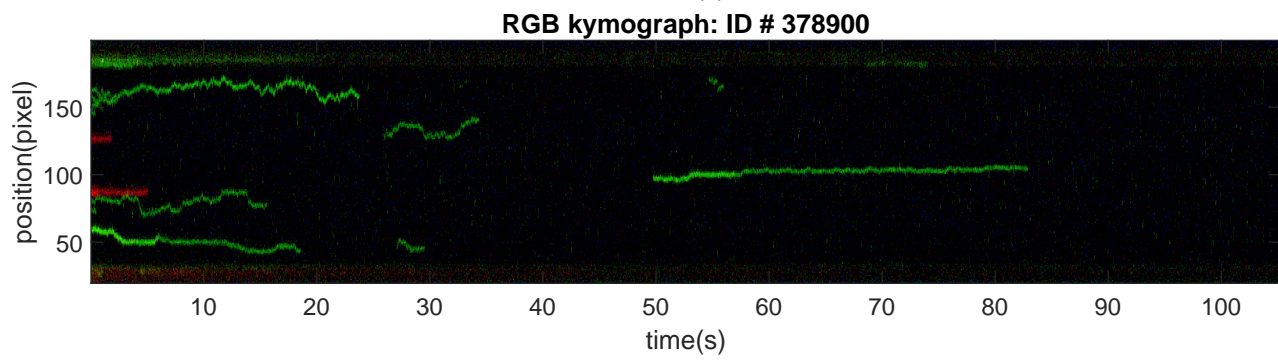

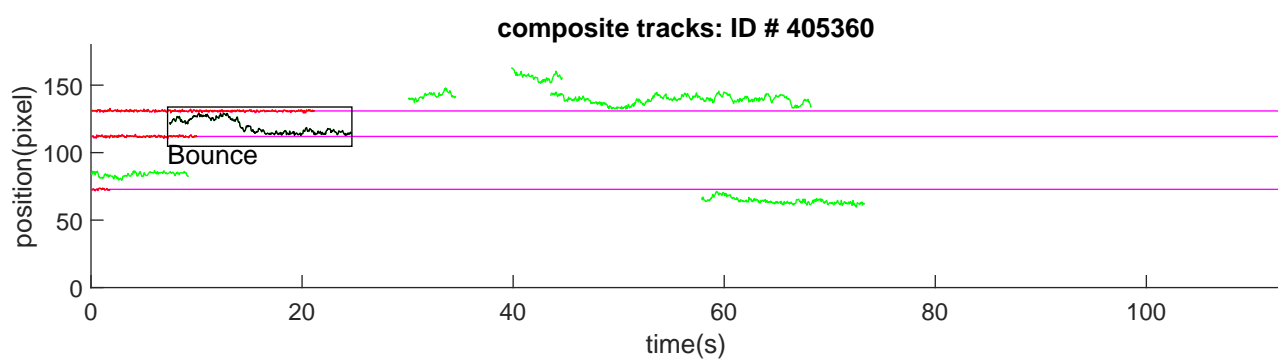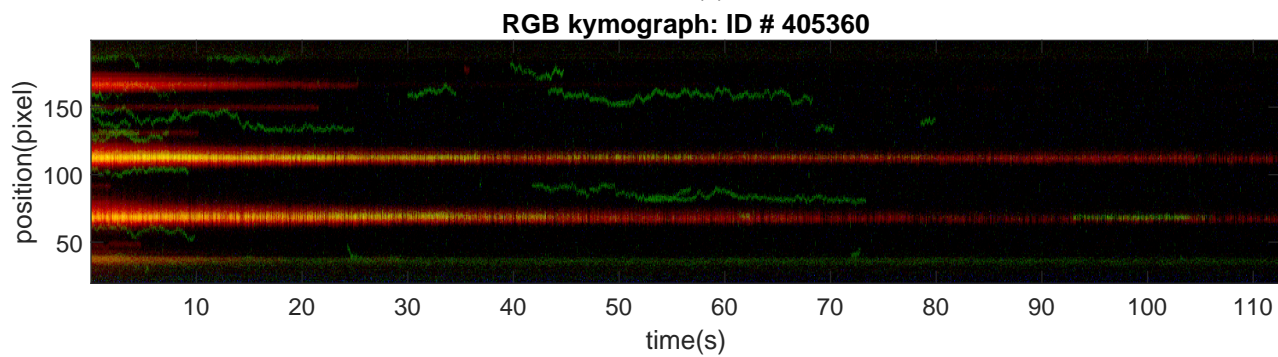

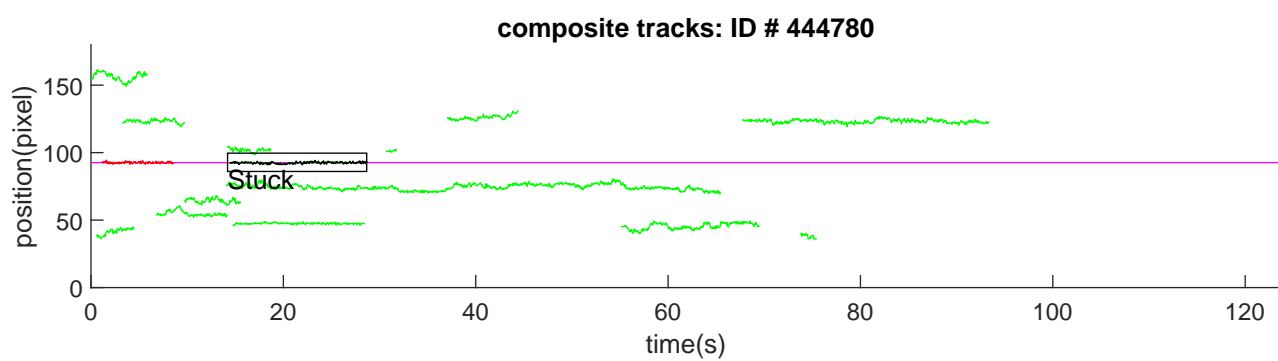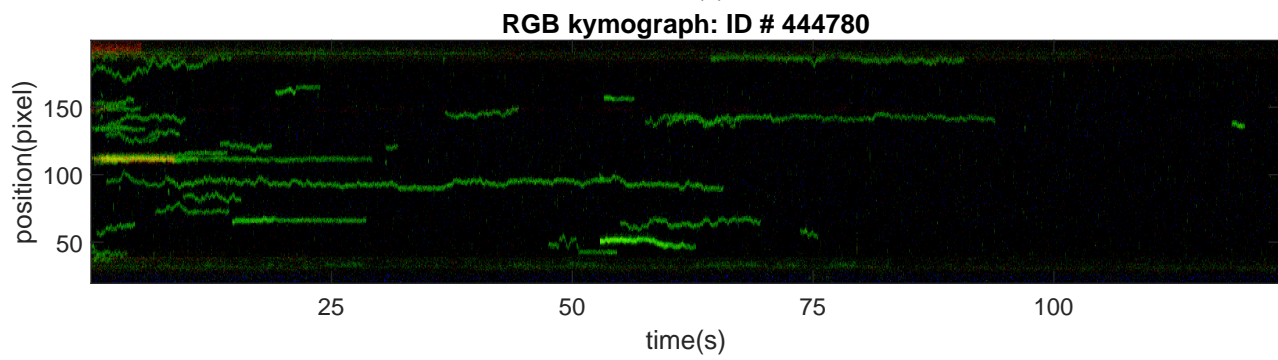

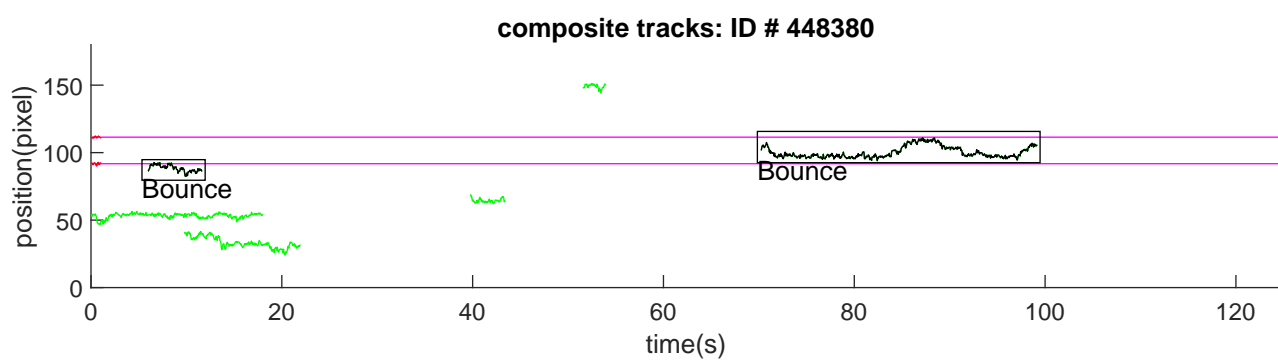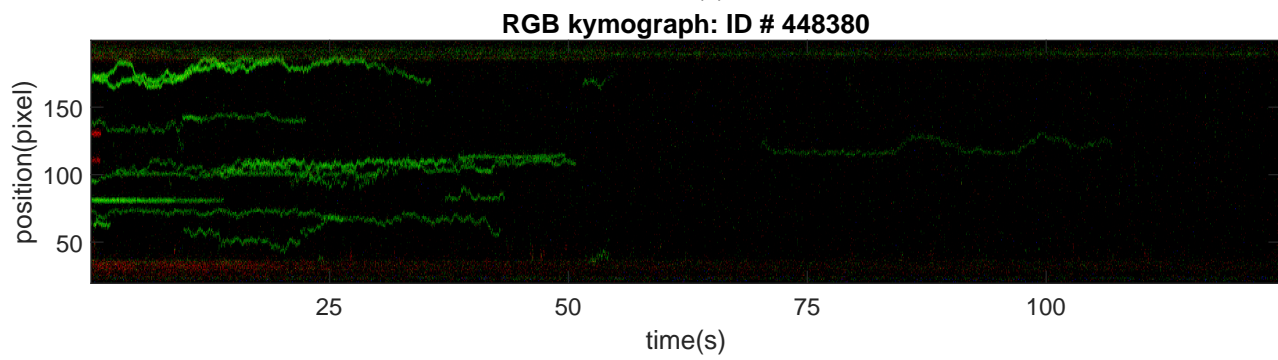

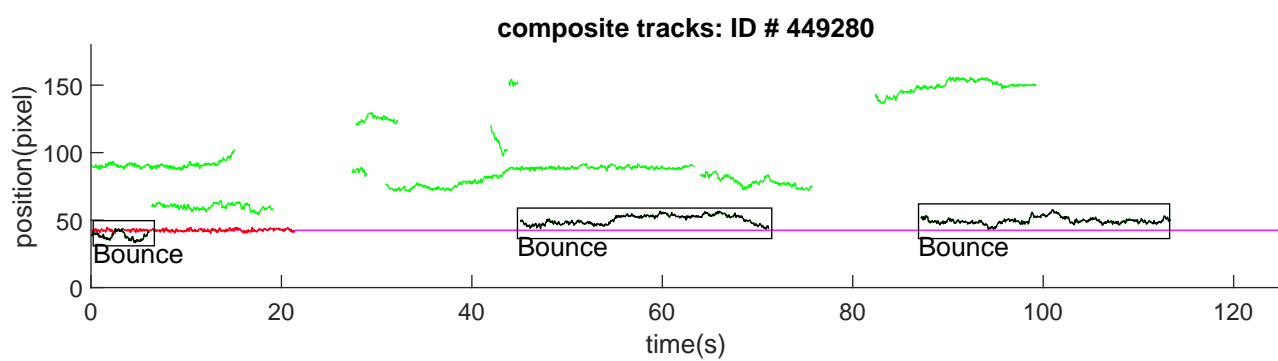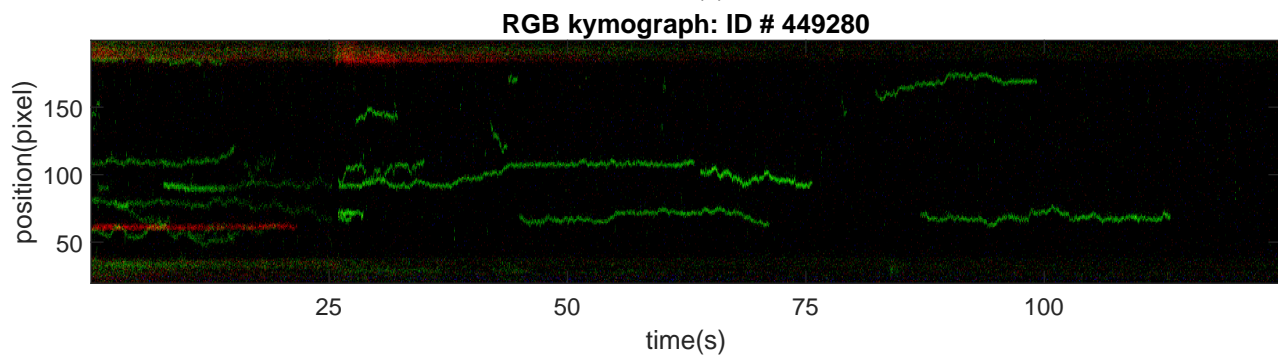

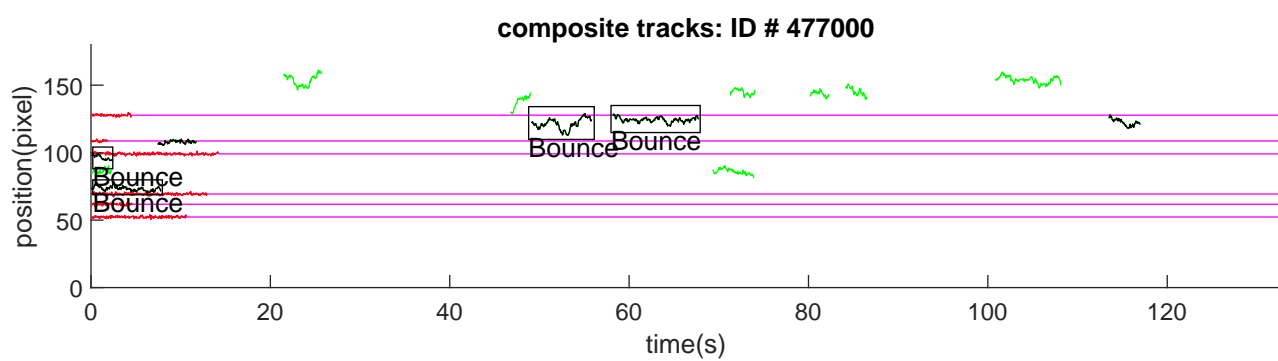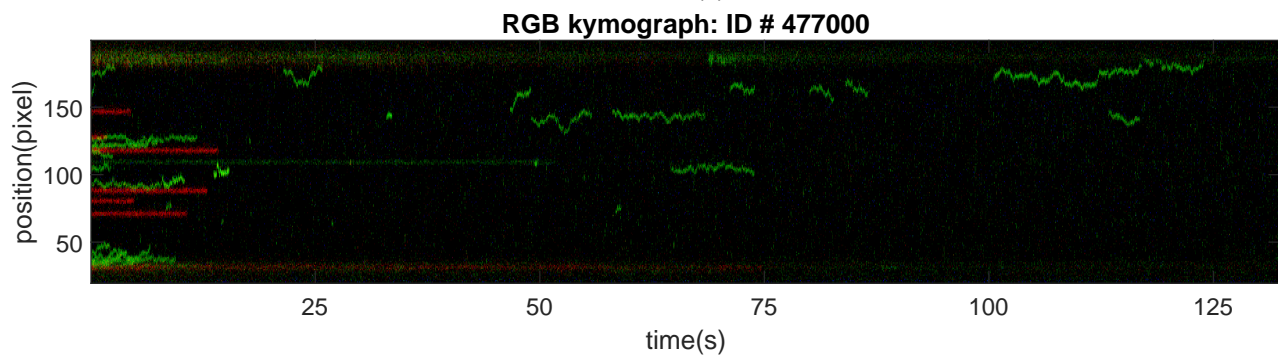

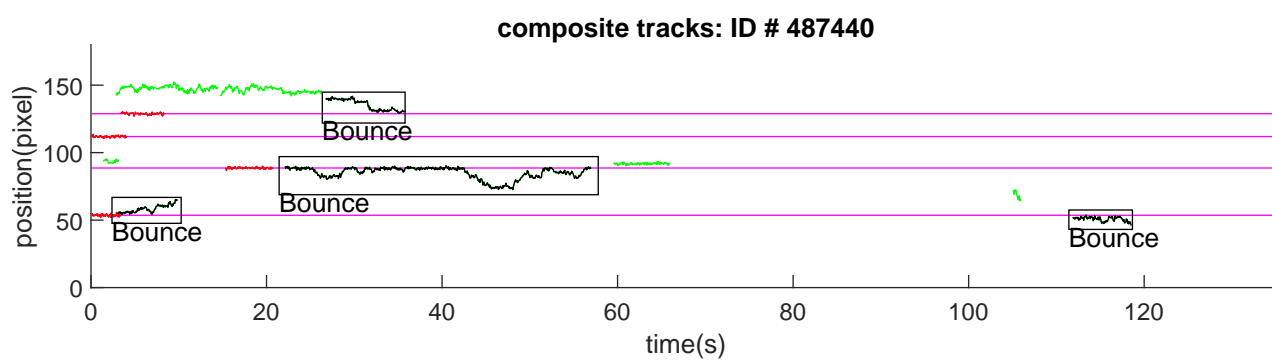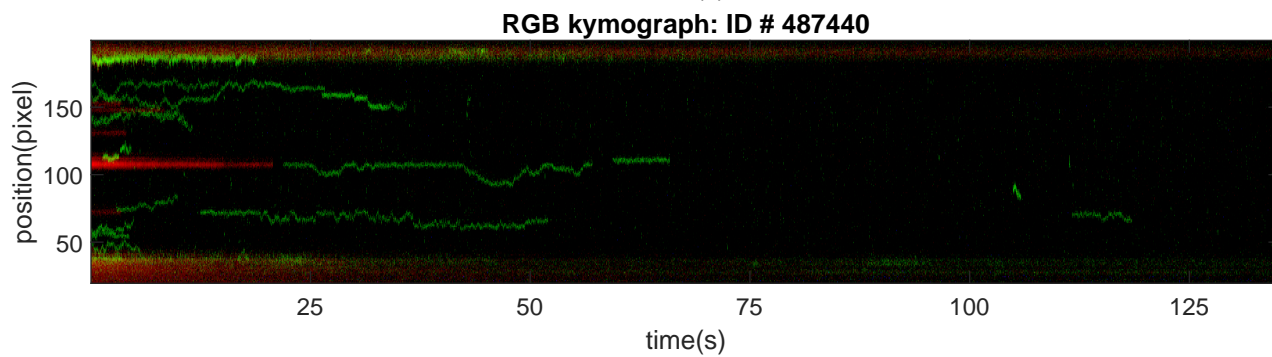



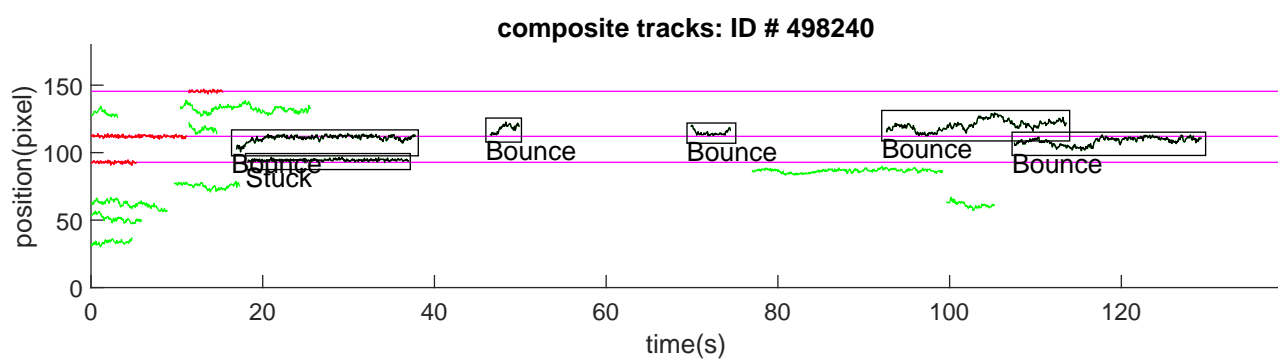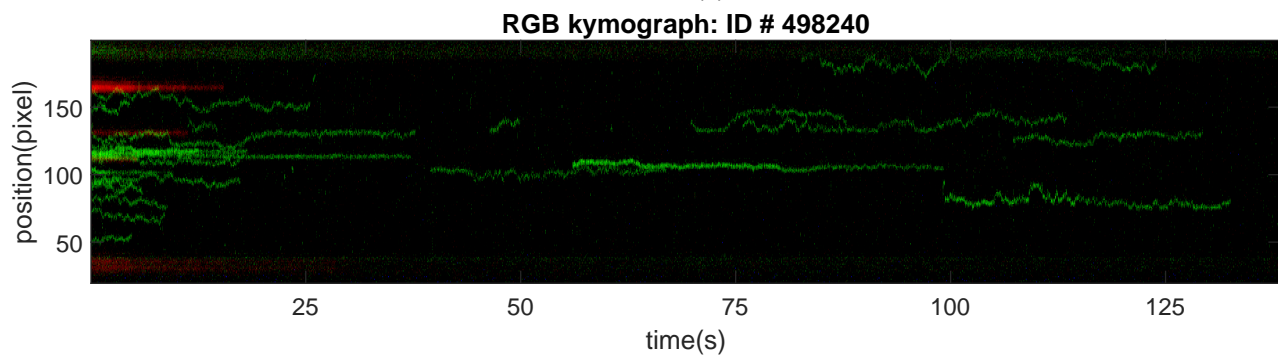

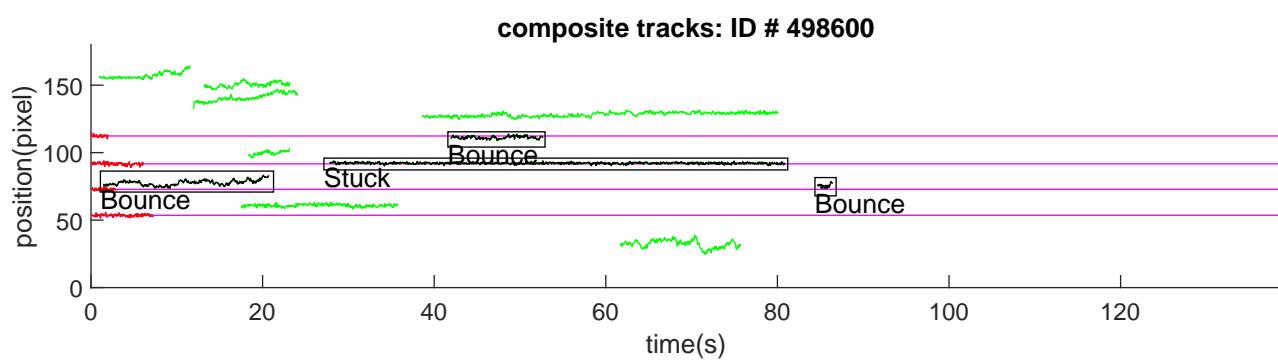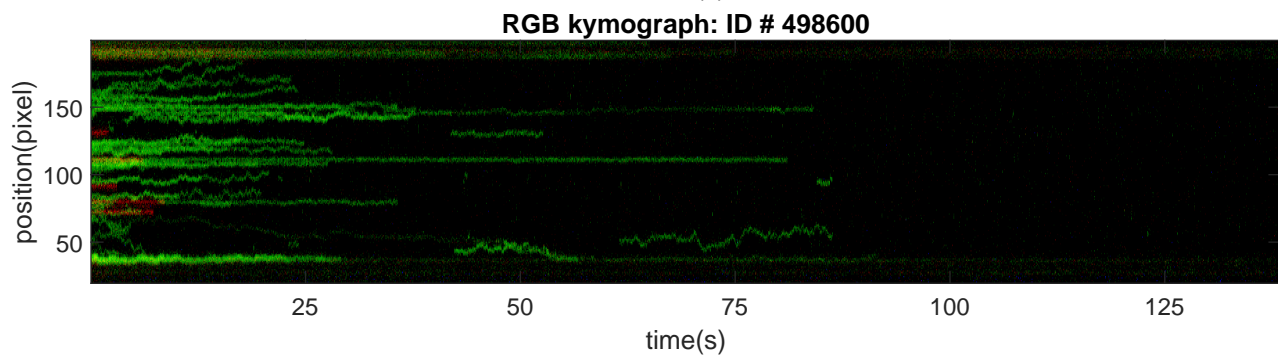

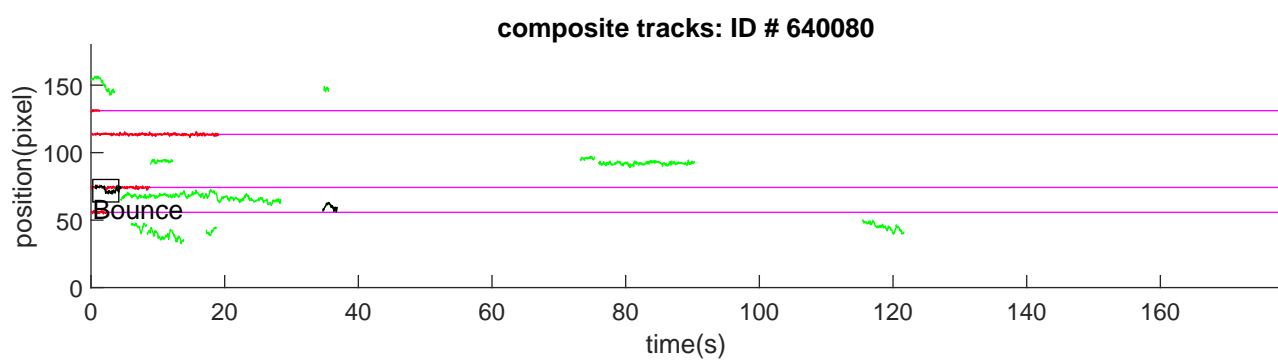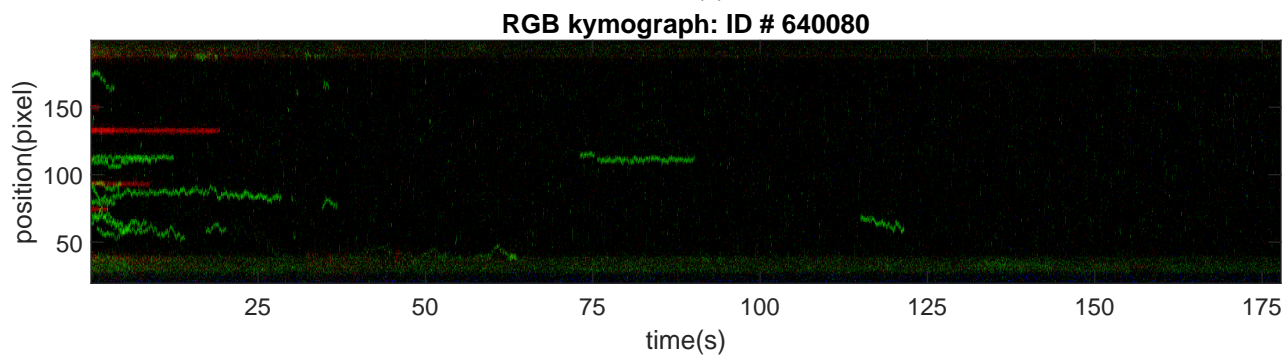

Supplement: supp [file elife-77352-supp-v1.zip]
