# Supplementary material for: ATP binding facilitates target search of SWR1 chromatin remodeler by promoting one-dimensional diffusion on DNA
Source: eLife journal article supplement (doi:10.7554/elife.77352), 2022-07-25
Supplement: supp [file Figure 1 figure supplement 1.xlsx]

## Sheet: Panel C
n =	DNA Length	On Rate	Error (St Dev)	Norm On Rate	Norm Error
40	20	5e-08	2e-08	3.75e-07	1.5e-07
67	40	9e-08	1e-08	3.375e-07	3.75e-08
267	60	1.6e-07	2e-08	4e-07	5e-08
129	80	1.7e-07	4e-08	3.1875e-07	7.5e-08
221	100	2.1e-07	3e-08	3.15e-07	4.5e-08
409	150	3.6e-07	2e-08	3.6e-07	2e-08
	two-tailed P	Statistical Tests
	Group 1	20	20	20	20	20
	Group 2	40	60	80	100	150
	Result (p-value)	NS	NS	NS	NS	NS

## Sheet: Panel F SWR1 150bp DNA
Data best fit to a double exponential decay function
Data collected by Matt Poyton
Buffer Only											two-tailed P	Statistical Tests
Replicate	A1	T1	A2	T2	% T2	Amp Avg	Avg Amp Avg	N	Total N		Group 1	Buffer Only	Buffer Only	Buffer Only	ssDNA	ssDNA	High Salt
1	0.76	90.9091	0.22	7.14286	0.77551	72.1044	52.0339	135	563		Group 2	ssDNA	High Salt	ATP	High Salt	ATP	ATP
2	0.75	52.6316	0.27	3.22581	0.735294	39.5536	Std	228			Result (p-value)	0.0252	0.0238	0.8149	0.7765	0.0031	0.0031
3	0.51	76.9231	0.45	7.63359	0.53125	44.4436	17.5527	200
											Condition	Avg Amp Avg	Std
Buffer plus ATP											SWR1 Buffer Only	52.0339	17.5527
Replicate	A1	T1	A2	T2	% T2	Amp Avg	Avg Amp Avg	N	Total N		SWR1 ATP	49.2264	8.39171
1	0.74	58.8235	0.31	1.92308	0.704762	42.0243	49.2264	198	588		SWR1 High Salt	15.1645	3.95303
2	0.73	62.5	0.27	5.88235	0.73	47.2132	Std	192			SWR1 ssDNA	16.0711	3.3312
3	0.6	100	0.45	3.0303	0.571429	58.4416	8.39171	198			Swc2 Buffer Only	12.5373	3.23027
											Swc2 High Salt	2.91306	1.55233
High Salt (200mM NaCl)											Swc2 ssDNA	1.67781	0.171502
Replicate	A1	T1	A2	T2	% T2	Amp Avg	Avg Amp Avg	N	Total N
1	0.89	1.35135	0.28	40	0.760684	10.6006	15.1645	169	538
2	0.76	14.4928	0.44	22.7273	0.633333	17.5121	Std	201
3	0.68	2.38095	0.42	41.6667	0.618182	17.381	3.95303	168
ssDNA
Replicate	A1	T1	A2	T2	% T2	Amp Avg	Avg Amp Avg	N	Total N
1	0.69	1.51515	0.42	40	0.378378	16.077	16.0711	431	750
2	0.83	1.99601	0.29	43.4783	0.258929	12.7369	Std	172
3	0.76	2.27273	0.36	55.5556	0.321429	19.3994	3.3312	147

## Sheet: Panel H Swc2 150bp DNA
Data best fit to a double exponential decay function
Data collected by X. Ashlee Feng
Buffer Only											two-tailed P	Statistical Tests
Replicate	A1	T1	A2	T2	% T2	Amp Avg	Avg Amp Avg	N	Total N		Group 1	Buffer Only	Buffer Only	ssDNA
1	0.56209	0.91602	0.42369	28.2097	0.429802	12.6469	12.5373	338	1027		Group 2	ssDNA	High Salt	High Salt
2	0.5873	1.15558	0.40276	36.9364	0.406804	15.7113	Std	415			Result (p-value)	0.0044	0.0097	0.2426
3	0.65212	0.7994	0.34206	25.3711	0.344062	9.25359	3.23027	274
												Avg Amp Avg	Std
ssDNA											Swc2 Buffer Only	12.5373	3.23027
Replicate	A1	T1	A2	T2	% T2	Amp Avg	Avg Amp Avg	N	Total N		Swc2 High Salt	2.91306	1.55233
1	0.71897	0.2305	0.2181	6.87028	0.232747	1.77589	1.67781	293	699		Swc2 ssDNA	1.67781	0.171502
2	1.32167	0.26433	0.29758	6.87806	0.183776	1.47978	Std	218
3	0.67931	0.24662	0.23812	6.1458	0.259551	1.77776	0.171502	188
												`
High Salt (200mM NaCl)
Replicate	A1	T1	A2	T2	% T2	Amp Avg	Avg Amp Avg	N	Total N
1	0.60139	0.4129	0.39409	11.172	0.395879	4.67221	2.91306	249	605
2	0.71663	0.27404	0.26955	7.80135	0.273327	2.33146	Std	245
3	0.81623	0.259	0.1801	8.42723	0.180763	1.73552	1.55233	111
