# Supplementary material for: ATP binding facilitates target search of SWR1 chromatin remodeler by promoting one-dimensional diffusion on DNA
Source: eLife journal article supplement (doi:10.7554/elife.77352), 2022-07-25
Supplement: supp [file Figure 1.xlsx]

## Sheet: Panel F
DNA Length	On Rate	Error (St Dev)	N
20	5e-08	2e-08	40
40	9e-08	1e-08	67
60	1.6e-07	2e-08	267
80	1.7e-07	4e-08	129
100	2.1e-07	3e-08	221
150	3.6e-07	2e-08	409
Panel F
two-tailed P	Statistical Tests
Group 1	20	40	40	80	100
Group 2	40	60	80	100	150
Result (p-value)	0.0363	0.0056	0.7183	0.2381	0.002
	*	**	N.S.	N.S.	**
two-tailed P	Statistical Tests
Group 1	60
Group 2	100
Result (p-value)	0.0742
	N.S.

## Sheet: Panel G
DNA Length	Off Time	Error (St. Dev.)	N
20	1.5224	0.265125	48
40	8.95022	1.45461	118
60	12.6752	5.79855	291
80	36.3894	22.0311	382
100	31.3453	2.72902	339
150	31.8628	12.8779	363
Panel G
two-tailed P	Statistical Tests
Group 1	20	40	40	80	100
Group 2	40	60	80	100	150
Result (p-value)	0.001	0.3412	0.1457	0.714	0.949
	***	N.S.	N.S.	N.S.	N.S.
two-tailed P	Statistical Tests
Group 1	40	40	40
Group 2	80	100	150
Result (p-value)	0.0977	0.0002	0.0376
	N.S.	***	*
Group 1		60	60
Group 2		100	150
Result (p-value)		0.0073	0.0782
		**	N.S.
