# Supplementary material for: ATP binding facilitates target search of SWR1 chromatin remodeler by promoting one-dimensional diffusion on DNA
Source: eLife journal article supplement (doi:10.7554/elife.77352), 2022-07-25
Supplement: supp [file Figure 2.xlsx]

## Sheet: Panel D
		m	b	r2	pval
	Line 1	0.0059	0.016	0.8326	1.0056e-16
	Line 2	0.0302	0.009207	0.98912	4.0403e-20
	Line 3	0.052148	0.0060482	0.994	4.4304e-18
	Line 4	0.06449	0.0015938	0.99734	1.0392e-33
	Line 5	0.095051	0.0079885	0.99366	4.4159e-10
	Time						MSD
	Line 1	Line 2	Line 3	Line 4	Line 5		Line 1	Line 2	Line 3	Line 4	Line 5
	0.05443	0.06851	0.05443	0.05443	0.05443		0.0112949	0.0101333	0.00912264	0.00790672	0.0113902
	0.10886	0.13702	0.10886	0.10886	0.10886		0.0145057	0.015427	0.0129192	0.0100689	0.0171453
	0.16329	0.20553	0.16329	0.16329	0.16329		0.0160902	0.0167147	0.0152996	0.0119009	0.02464
	0.21772	0.27404	0.21772	0.21772	0.21772		0.0157887	0.0183133	0.0175119	0.0129402	0.0295832
	0.27215	0.34255	0.27215	0.27215	0.27215		0.0154283	0.0204853	0.0186038	0.0180405	0.036217
	0.32658	0.41106	0.32658	0.32658	0.32658		0.0172481	0.0224543	0.0208834	0.0219048	0.0390701
	0.38101	0.47957	0.38101	0.38101	0.38101		0.0183961	0.0237701	0.0242829	0.0259031	0.0447213
	0.43544	0.54808	0.43544	0.43544	0.43544		0.0198764	0.0242318	0.0286325	0.0278859	0.0489116
	0.48987	0.61659	0.48987	0.48987	0.48987		0.0188463	0.0251001	0.0332514	0.0310867	0.0541201
	0.5443	0.6851	0.5443	0.5443	0.5443		0.0208479	0.0286474	0.0359169	0.0358384	0.0586341
	0.59873	0.75361	0.59873	0.59873	0.59873		0.0210362	0.0298364	0.0379479	0.0410499	0.0629337
	0.65316	0.82212	0.65316	0.65316	0.65316		0.0219339	0.0327219	0.0404666	0.0439467	0.0666055
	0.70759	0.89063	0.70759	0.70759	0.70759		0.0199989	0.0375032	0.0423286	0.0472674	0.0694227
	0.76202	0.95914	0.76202	0.76202	0.76202		0.020143	0.0389056	0.0466937	0.0519707	0.0713054
	0.81645	1.02765	0.81645	0.81645	0.81645		0.0220234	0.0390787	0.0480112	0.0564712	0.0736206
	0.87088	1.09616	0.87088	0.87088	0.87088		0.023455	0.0424851	0.0507619	0.0582645	0.0773402
	0.92531	1.16467	0.92531	0.92531	0.92531		0.0222934	0.0448399	0.0544647	0.0611018	0.0798606
	0.97974	1.23318	0.97974	0.97974	0.97974		0.0217163	0.0474029	0.056771	0.0662058	0.0832837
	1.03417	1.30169	1.03417	1.03417	1.03417		0.0216575	0.0486356	0.0576858	0.0693522	0.0862883
	1.0886	1.3702	1.0886	1.0886	1.0886		0.023568	0.0497675	0.0587061	0.0722785	0.0898015
	1.14303	1.43871	1.14303	1.14303	1.14303		0.0260411	0.0544816	0.0607247	0.0742059	0.0933998
	1.19746	1.50722	1.19746	1.19746	1.19746		0.0220046	0.0557389	0.0618273	0.0793254	0.0981395
	1.25189	1.57573	1.25189	1.25189	1.25189		0.0227234	0.0543097	0.0629355	0.0837859	0.105481
	1.30632	1.64424	1.30632	1.30632	1.30632		0.0240579	0.0556913	0.0642678	0.087553	0.11297
	1.36075	1.71275	1.36075	1.36075	1.36075		0.0265479	0.0565474	0.0641879	0.08703	0.120232
	1.41518	1.78126	1.41518	1.41518	1.41518		0.0263244	0.0578081	0.0646758	0.0913126	0.126491
	1.46961	1.84977	1.46961	1.46961	1.46961		0.0249339	0.0574087	0.0656561	0.09528	0.131641
	1.52404	1.91828	1.52404	1.52404	1.52404		0.0258292	0.0590142	0.0686821	0.0997823	0.13641
	1.57847	1.98679	1.57847	1.57847	1.57847		0.0273858	0.060743	0.0728005	0.0972167	0.144742
	1.6329	2.0553	1.6329	1.6329	1.6329		0.0266435	0.0628402	0.0745539	0.0996467	0.154245
	1.68733	2.12381	1.68733	1.68733	1.68733		0.026136	0.0636577	0.076483	0.101203	0.160595
	1.74176	2.19232	1.74176	1.74176	1.74176		0.0272294	0.0640425	0.07668	0.106392	0.16944
	1.79619	2.26083	1.79619	1.79619	1.79619		0.0261337	0.0672881	0.0802242	0.106533	0.177318
	1.85062	2.32934	1.85062	1.85062	1.85062		0.0258091	0.0678366	0.083477	0.107906	0.186126
	1.90505	2.39785	1.90505	1.90505	1.90505		0.0265851	0.0682808	0.0880986	0.107776	0.188583
	1.95948	2.46636	1.95948	1.95948	1.95948		0.0269099	0.0716312	0.0903465	0.109207	0.194046
	2.01391	2.53487	2.01391	2.01391	2.01391		0.0276147	0.0739277	0.0925422	0.108984	0.1957
	2.06834	2.60338	2.06834	2.06834	2.06834		0.0279705	0.072804	0.0937228	0.108831	0.200896
	2.12277	2.67189	2.12277	2.12277	2.12277		0.0258153	0.0737822	0.0937195	0.106485	0.198983
	2.1772	2.7404	2.1772	2.1772	2.1772		0.0248742	0.0750709	0.0957004	0.107029	0.200881
	2.23163	2.80891	2.23163	2.23163	2.23163		0.0271122	0.0770952	0.0966862	0.10878	0.19992
	2.28606	2.87742	2.28606	2.28606	2.28606		0.0274844	0.077103	0.0977176	0.109009	0.20372
	2.34049	2.94593	2.34049	2.34049	2.34049		0.0267058	0.0772596	0.0999703	0.106117	0.205826
	2.39492	3.01444	2.39492	2.39492	2.39492		0.0251587	0.0782307	0.102656	0.108726	0.215303
	2.44935	3.08295	2.44935	2.44935	2.44935		0.0239823	0.0803882	0.100779	0.10819	0.219873
	2.50378	3.15146	2.50378	2.50378	2.50378		0.0235142	0.0818451	0.101608	0.107688	0.225684
	2.55821	3.21997	2.55821	2.55821	2.55821		0.0213651	0.0823263	0.10035	0.106634	0.228712
	2.61264	3.28848	2.61264	2.61264	2.61264		0.0228378	0.0852942	0.0996942	0.10963	0.235042
	2.66707	3.35699	2.66707	2.66707	2.66707		0.0202172	0.0868363	0.100854	0.109867	0.239279
	2.7215	3.4255	2.7215	2.7215	2.7215		0.0212842	0.0864644	0.0996788	0.10866	0.24492
	2.77593	3.49401	2.77593	2.77593	2.77593		0.0229329	0.0873251	0.0996407	0.108025	0.243277
	2.83036	3.56252	2.83036	2.83036	2.83036		0.0225695	0.087399	0.0966605	0.106889	0.244415
	2.88479	3.63103	2.88479	2.88479	2.88479		0.0204527	0.0880907	0.0927274	0.10629	0.24754
	2.93922	3.69954	2.93922	2.93922	2.93922		0.0218872	0.089491	0.0918562	0.104232	0.252518
	2.99365	3.76805	2.99365	2.99365	2.99365		0.0232973	0.0896852	0.0903066	0.101716	0.259351
	3.04808	3.83656	3.04808	3.04808	3.04808		0.0245176	0.0927441	0.0876581	0.0957787	0.267181
	3.10251	3.90507	3.10251	3.10251	3.10251		0.0251002	0.0948629	0.0845498	0.0921518	0.271886
	3.15694	3.97358	3.15694	3.15694	3.15694		0.0230478	0.0965318	0.0796396	0.0878741	0.274911
	3.21137	4.04209	3.21137	3.21137	3.21137		0.0251144	0.0964837	0.0758124	0.0810874	0.280181
	3.2658	4.1106	3.2658	3.2658	3.2658		0.025476	0.100455	0.0740831	0.0735528	0.281663
	3.32023	4.17911	3.32023	3.32023	3.32023		0.0227908	0.104053	0.0727182	0.0641887	0.289544
	3.37466	4.24762	3.37466	3.37466	3.37466		0.0199751	0.104402	0.0713889	0.0570609	0.293316
	3.42909	4.31613	3.42909	3.42909	3.42909		0.0206275	0.107192	0.0663857	0.0536303	0.301882
	3.48352	4.38464	3.48352	3.48352	3.48352		0.0249936	0.109785	0.0619399	0.0474789	0.306625
	3.53795	4.45315	3.53795	3.53795	3.53795		0.0253372	0.111192	0.0582853	0.040276	0.315117
	3.59238	4.52166	3.59238	3.59238	3.59238		0.0248017	0.114124	0.0560325	0.0349974	0.317791
	3.64681	4.59017	3.64681	3.64681	3.64681		0.0240939	0.117511	0.0551089	0.0337359	0.323519
	3.70124	4.65868	3.70124	3.70124	3.70124		0.0252862	0.122253	0.0530735	0.0311309	0.325015
	3.75567	4.72719	3.75567	3.75567	3.75567		0.0252544	0.121251	0.0495567	0.0281079	0.336203
	3.8101	4.7957	3.8101	3.8101	3.8101		0.0286496	0.120571	0.0497417	0.0264317	0.344478
	3.86453	4.86421	3.86453	3.86453	3.86453		0.0288355	0.123525	0.0482429	0.0267077	0.35865
	3.91896	4.93272	3.91896	3.91896	3.91896		0.0257112	0.125202	0.0470018	0.0241765	0.37015
	3.97339	5.00123	3.97339	3.97339	3.97339		0.0268779	0.124294	0.0454273	0.0243299	0.38474
	4.02782	5.06974	4.02782	4.02782	4.02782		0.0258138	0.123406	0.0456761	0.0240557	0.392589
	4.08225	5.13825	4.08225	4.08225	4.08225		0.0286481	0.125923	0.0448454	0.0212814	0.412761
	4.13668	5.20676	4.13668	4.13668	4.13668		0.0284225	0.127875	0.0461235	0.0213261	0.427962
	4.19111	5.27527	4.19111	4.19111	4.19111		0.029266	0.13174	0.0453583	0.0207715	0.448074
	4.24554	5.34378	4.24554	4.24554	4.24554		0.0337945	0.131556	0.0460497	0.0181231	0.461147
	4.29997	5.41229	4.29997	4.29997	4.29997		0.031519	0.129373	0.0454011	0.0176677	0.473559
	4.3544	5.4808	4.3544	4.3544	4.3544		0.0281066	0.129424	0.0439604	0.0192909	0.482792
	4.40883	5.54931	4.40883	4.40883	4.40883		0.0302485	0.130914	0.0430411	0.0157671	0.4925
	4.46326	5.61782	4.46326	4.46326	4.46326		0.0344562	0.128954	0.0428617	0.0129349	0.50444
	4.51769	5.68633	4.51769	4.51769	4.51769		0.0348346	0.129123	0.0434817	0.0123388	0.512673
	4.57212	5.75484	4.57212	4.57212	4.57212		0.0355064	0.126552	0.0406978	0.013504	0.537483
	4.62655	5.82335	4.62655	4.62655	4.62655		0.0328593	0.124796	0.0418413	0.0131866	0.564426
	4.68098	5.89186	4.68098	4.68098	4.68098		0.033178	0.125333	0.0406049	0.012321	0.584814
	4.73541	5.96037	4.73541	4.73541	4.73541		0.0372706	0.126828	0.0430275	0.0130654	0.610678
	4.78984	6.02888	4.78984	4.78984	4.78984		0.0402603	0.129555	0.0434711	0.0168699	0.63822
	4.84427	6.09739	4.84427	4.84427	4.84427		0.0348343	0.128516	0.0428728	0.018645	0.663036
	4.8987	6.1659	4.8987	4.8987	4.8987		0.0357662	0.126174	0.0453056	0.0177806	0.681634
	4.95313	6.23441	4.95313	4.95313	4.95313		0.0331193	0.127916	0.0473031	0.0178899	0.71293
	5.00756	6.30292	5.00756	5.00756	5.00756		0.0284428	0.131951	0.0509105	0.0197709	0.726983
	5.06199	6.37143	5.06199	5.06199	5.06199		0.027348	0.129122	0.0559876	0.0226109	0.740503
	5.11642	6.43994	5.11642	5.11642	5.11642		0.0238749	0.124213	0.0622082	0.0256192	0.731179
	5.17085	6.50845	5.17085	5.17085	5.17085		0.023919	0.124482	0.0657238	0.0275568	0.737995
	5.22528	6.57696	5.22528	5.22528	5.22528		0.0218395	0.124915	0.0702225	0.0304968	0.746566
	5.27971	6.64547	5.27971	5.27971	5.27971		0.0248293	0.124623	0.0750857	0.036326	0.743504
	5.33414	6.71398	5.33414	5.33414	5.33414		0.0232392	0.122455	0.0815765	0.0376055	0.751953
	5.38857	6.78249	5.38857	5.38857	5.38857		0.0213858	0.118361	0.0873887	0.0410365	0.750833
	5.443	6.851	5.443	5.443	5.443		0.0207744	0.117529	0.093765	0.0440049	0.752999
	5.49743	6.91951	5.49743	5.49743	5.49743		0.0260625	0.113321	0.0982814	0.0490816	0.738896
	5.55186	6.98802	5.55186	5.55186	5.55186		0.0256651	0.111023	0.104534	0.0536294	0.731018
	5.60629	7.05653	5.60629	5.60629	5.60629		0.0240241	0.11359	0.107798	0.0560678	0.728208
	5.66072	7.12504	5.66072	5.66072	5.66072		0.027993	0.112357	0.112263	0.0656972	0.740269
	5.71515	7.19355	5.71515	5.71515	5.71515		0.0271045	0.107297	0.114197	0.0786966	0.7352
	5.76958	7.26206	5.76958	5.76958	5.76958		0.0279346	0.111479	0.117459	0.0917563	0.748013
	5.82401	7.33057	5.82401	5.82401	5.82401		0.0215472	0.114627	0.12412	0.102975	0.736585
	5.87844	7.39908	5.87844	5.87844	5.87844		0.0192968	0.112392	0.126658	0.115973	0.748814
	5.93287	7.46759	5.93287	5.93287	5.93287		0.0192807	0.108497	0.130888	0.128047	0.724979
	5.9873	7.5361	5.9873	5.9873	5.9873		0.0225134	0.107038	0.135621	0.155359	0.68212
	6.04173	7.60461	6.04173	6.04173	6.04173		0.0201563	0.10436	0.134262	0.161936	0.533878
	6.09616	7.67312	6.09616	6.09616	6.09616		0.0167839	0.0999873	0.1377	0.151381	0.545281
	6.15059	7.74163	6.15059	6.15059	6.15059		0.0161514	0.0998894	0.139921	0.168146	0.51338
	6.20502	7.81014	6.20502	6.20502	6.20502		0.015489	0.097618	0.141003	0.186	0.595234
	6.25945	7.87865	6.25945	6.25945			0.0187482	0.10339	0.145941	0.161809
	6.31388	7.94716	6.31388	6.31388			0.0130938	0.103081	0.146758	0.178457
	6.36831	8.01567	6.36831	6.36831			0.0130817	0.097426	0.149945	0.176873
	6.42274	8.08418	6.42274	6.42274			0.0136198	0.0929681	0.151113	0.180351
	6.47717	8.15269	6.47717	6.47717			0.0136264	0.0931461	0.152719	0.267687
	6.5316	8.2212	6.5316	6.5316			0.0153793	0.0956135	0.158141	0.358376
	6.58603	8.28971	6.58603				0.0178694	0.0960797	0.160474
	6.64046	8.35822	6.64046				0.0166879	0.09681	0.163916
	6.69489	8.42673	6.69489				0.0215093	0.0967448	0.164525
	6.74932	8.49524	6.74932				0.0256878	0.0918954	0.168322
	6.80375	8.56375	6.80375				0.0211479	0.0897156	0.170161
	6.85818	8.63226	6.85818				0.0192266	0.0853417	0.173321
	6.91261	8.70077	6.91261				0.0148723	0.0824335	0.175781
	6.96704	8.76928	6.96704				0.0225248	0.0775318	0.176101
	7.02147	8.83779	7.02147				0.0189311	0.07589	0.177786
	7.0759	8.9063	7.0759				0.0178994	0.076332	0.17713
	7.13033	8.97481	7.13033				0.0163298	0.0755312	0.174947
	7.18476	9.04332	7.18476				0.0130967	0.0758669	0.178983
	7.23919	9.11183	7.23919				0.0209212	0.0785022	0.180753
	7.29362	9.18034	7.29362				0.0160258	0.0745692	0.181787
	7.34805	9.24885	7.34805				0.0193205	0.0707067	0.184687
	7.40248	9.31736	7.40248				0.0161045	0.0667671	0.182808
	7.45691	9.38587	7.45691				0.0301863	0.0659201	0.183226
		9.45438	7.51134					0.0701639	0.180924
		9.52289	7.56577					0.071235	0.180498
		9.5914	7.6202					0.0696448	0.181536
		9.65991	7.67463					0.0687534	0.179475
		9.72842	7.72906					0.0690879	0.180265
		9.79693	7.78349					0.0629774	0.178845
		9.86544	7.83792					0.0582023	0.176819
		9.93395	7.89235					0.0553705	0.171494
		10.0025	7.94678					0.0522494	0.167142
		10.071	8.00121					0.0547126	0.164353
		10.1395	8.05564					0.0573251	0.157791
		10.208	8.11007					0.0547829	0.152966
		10.2765	8.1645					0.0564148	0.147867
		10.345	8.21893					0.0616736	0.143548
		10.4135	8.27336					0.0612588	0.13637
		10.482	8.32779					0.06121	0.118983
		10.5505	8.38222					0.0610325	0.113402
		10.619	8.43665					0.0594437	0.105831
		10.6876	8.49108					0.0604586	0.0925509
		10.7561	8.54551					0.0609786	0.0835134
		10.8246	8.59994					0.0559349	0.07419
		10.8931	8.65437					0.0525505	0.0711939
		10.9616	8.7088					0.0518165	0.0659757
		11.0301	8.76323					0.0513263	0.0572362
		11.0986	8.81766					0.0530881	0.0552768
		11.1671	8.87209					0.0523718	0.0505608
		11.2356	8.92652					0.0490943	0.0445673
		11.3041	8.98095					0.0665136	0.04348
		11.3727	9.03538					0.0842332	0.0318939
		11.4412	9.08981					0.0948824	0.031627
		11.5097	9.14424					0.0945657	0.0239861
		11.5782	9.19867					0.0833957	0.0275594
		11.6467	9.2531					0.0536591	0.0134876
		11.7152	9.30753					0.0556193	0.0105546
		11.7837	9.36196					0.103036	0.00250436
		11.8522	9.41639					0.156057	0.0114031
		11.9207	9.47082					0.183089	0.000555871
		11.9893						0.0988002

## Sheet: Panel E
		Values in Histogram (Dcoef)
		dCas9		no ATP (SWR1)
		0.00033568		0.0480674
		9.89896e-05		0.00293431
		0.000870381		0.0322449
		0.00372736		0.00750164
		0.000149473		0.0260741
		0.000277188		0.0475253
		0.000189448		0.0243233
		0		0.0523349
		0.000457193		0.0796309
		0.000401656		0.1305
		0		0.0030893
		0.000178082		0.0600046
		0.0022772		0.101504
		2.23968e-05		0.0159699
		2.6743e-05		0.0148077
		0.000120689		0.0150889
		0.000396521		0.00791935
		0.000258957		0.00277393
		0.000372687		0.0790849
		0.00357804		0.0489457
		7.29197e-05		0.0270382
		0		0.0210992
		0.000156483		0.0518832
		0.000346347		0.0512973
		0.000240031		0.021408
		1.38929e-05		0.0198649
		0.000242317		0.0219777
		0.00900825		0.0228869
		0.0063658		0.010197
		8.42756e-05		0.0611069
		0.000416438		0.0527285
		9.63411e-05		0.0372031
		0.00105852		0.0449031
		0		0.00909072
		0.00514401		0.0286619
		0.00286692		0.0040557
		0		0.00865328
		0.000819867		0.0103897
		0		0.0209946
		0.000427858		0.0220918
		0		0.00819591
		0.00145486		0.00459238
		0.00422312		0.0217097
		0.000530388		0.00464566
				0.0570535
				0.00437158
				0.016128
				0.00559652
				0.0322515
				0.00353417
				0.00514047
				0.0205663
				0.00917726
				0.0096981
				0.0144079
				0.0163202
				0.0110584
				0.0023605
				0.0406576
				0.0507424
				0.0348252
				0.0522751
				0.00468247
				0.00474449
				0.0284197
				0.0176187
				0.026842
				0.0100998
				0.00235418
				0.00460972
				0.0237695
				0.0161309
				0.0298678
				0.00769298
				0.00920159
				0.0333654
				0.0123088
				0.0176534
				0.023005
				0.00431738
				0.00445172
				0.0206844
				0.00302463
				0.00980614
				0.00270573
				0.00177522
				0.0321222
				0.00798704
				0.00210784
				0.0169494
				0.00943084
				0.00292913
				0.00436979
				0.00431771
				0.0436144
				0.0241459
				0.0202591
				0.0129259
				0.0179809
				0.0121943
				0.0277041
				0.0078175
				0.044471
				0.00276522
				0.0119834
				0.0171564
				0.0035801
				0.0111029
				0.00685357
				0.00638479
				0.045277
				0.0246682
				0.0260751
				0.0155773
				0.027903
				0.0151221
				0.0953952
				0.0293293
				0.00412462
				0.00791697
				0.0199735
				0.00633392
				0.000971557
				0.00840717
				0.0232812
				0.00136827
				0.0662499
				0.0166329
				0.011391
				0.0104204
				0.0210235
				0.0707122
				0.00696611
				0.0288484
				0.0227028
				0.0545155
				0.0460338
				0.00296481
				0.0099939
				0.00636668
				0.0277054
				0.00118413
				0.0149668
				0.0117204
				0.0966557
				0.012165
				0.0541891
				0.0426531
				0.0957975
				0.0147375
				0.00698797
				0.0119651
				0.00827899
				0.00921292
				0.0151899
				0.00195855
				0.000316419
				0.00192052
				0.0065035
				0.00308556
				0.0042753
				0.00837096
				0.00924822
				0.00763089
				0.00378407
				0.00928285
				0.0219739
				0.00416832
				0.020592
				0.00618006
				0.0172598
				0.0146121
				0.0243437
				0.0126124
				0.0276058
				0.0174388
				0.0243634
				0.0226379
				0.00604907
				0.00713465
				0.00169633
				0.00143575
				0.00703645
				0.0029399
				0.000774046
				0.00451822
				0.0016848
				0.000857607
				0.00111297
				0.00402709
				0.00188684
				0.00702243
				0.00199296
				0.00778979
				0.0041842
				0.00118783
				0.0299075
				0.0450481
				0.0453161
				0.0535669
				0.0167347
				0.0125247
				0.0158361
				0.00387437
				0.0216099
				0.00187944
				0.0133052
				0.0103933
				0.00568508
				0.0183555
				0.00205131
				0.0193395
				0.0192767
				0.0196649
				0.0103123
				0.0155451
				0.0185637
				0.0610909
				0.0779041
				0.00336555
				0.00340601
				0.0472311
				0.00626071
				0.00408978
				0.00835839
				0.0246995
				0.000698371
				0.0512836
				0.00181069
				0.0140168
				0.0151063
				0.0350402
				0.00517835
				0.00474292
				0.00679324
				0.00133897
				0.000701678
				0.0154519
				0.0497534
				0.00184714
				0.00119656
				0.00294501
				0.0174982
				0.0160895
				0.00252714
