# Supplementary material for: ATP binding facilitates target search of SWR1 chromatin remodeler by promoting one-dimensional diffusion on DNA
Source: eLife journal article supplement (doi:10.7554/elife.77352), 2022-07-25
Supplement: supp [file Figure 3.xlsx]

## Sheet: Panel A
dCas9			no ATP			1mM ATP
x	y	SEM	x	y	SEM	x	y	SEM
0.05827	0.00845767	0.000511015	0.05007	0.0053996	0.00017804	0.05	0.00950488	0.000301122
0.11654	0.00934514	0.000537212	0.10014	0.00760031	0.000336234	0.1	0.0140813	0.000509286
0.17481	0.00909851	0.00046325	0.15021	0.00939312	0.000494998	0.15	0.0178685	0.000720401
0.23308	0.00927018	0.000567238	0.20028	0.0110438	0.000648461	0.2	0.0214758	0.000938106
0.29135	0.00925612	0.000540602	0.25035	0.0125661	0.000779552	0.25	0.0248743	0.00119795
0.34962	0.00937524	0.000488802	0.30042	0.0140371	0.000934616	0.3	0.028133	0.00145582
0.40789	0.00933524	0.000562441	0.35049	0.0155231	0.00109775	0.35	0.0313191	0.00172103
0.46616	0.00969098	0.000641363	0.40056	0.0169107	0.00124051	0.4	0.0342373	0.0019932
0.52443	0.00936796	0.000604891	0.45063	0.0183995	0.00139367	0.45	0.0371664	0.00232755
0.5827	0.00950164	0.000620594	0.5007	0.0197486	0.00153287	0.5	0.0401931	0.0026803
0.64097	0.0096167	0.000694878	0.55077	0.0211697	0.00169395	0.55	0.0428701	0.00300484
0.69924	0.00957728	0.000607348	0.60084	0.022642	0.00185143	0.6	0.0457129	0.00334838
0.75751	0.00947047	0.000592406	0.65091	0.0240342	0.00200687	0.65	0.0486316	0.00373117
0.81578	0.0097345	0.000739021	0.70098	0.0252868	0.00215054	0.7	0.0515051	0.00413473
0.87405	0.00968692	0.000715778	0.75105	0.0265307	0.00230437	0.75	0.0539447	0.00458319
0.93232	0.0095517	0.000680391	0.80112	0.0277494	0.00244999	0.8	0.0568881	0.00507472
0.99059	0.00940819	0.000553652	0.85119	0.0289263	0.00259492	0.85	0.0598159	0.00562018
1.04886	0.00950595	0.000619766	0.90126	0.030083	0.00272771	0.9	0.063143	0.00615802
1.10713	0.00934228	0.000552369	0.95133	0.0311093	0.00285377	0.95	0.0658197	0.00667283
1.1654	0.00949611	0.000552775	1.0014	0.032258	0.00298415	1	0.0686395	0.00724313
1.22367	0.00965598	0.000679648	1.05147	0.0331347	0.00309505	1.05	0.0720222	0.00786631
1.28194	0.00953892	0.000546994	1.10154	0.0343465	0.00322352	1.1	0.0753841	0.00850662
1.34021	0.00966507	0.00062092	1.15161	0.0354803	0.00338418	1.15	0.0779496	0.00908289
1.39848	0.00972455	0.000703165	1.20168	0.0366304	0.00354522	1.2	0.0811256	0.00974434
1.45675	0.00938138	0.000553429	1.25175	0.0379267	0.00373611	1.25	0.0843633	0.0103499
1.51502	0.00949671	0.000533753	1.30182	0.0391825	0.00391028	1.3	0.0874538	0.0110025
1.57329	0.00968648	0.000651069	1.35189	0.0405365	0.00411122	1.35	0.09051	0.0116531
1.63156	0.00943092	0.000512157	1.40196	0.0417876	0.00430258	1.4	0.0939686	0.0123404
1.68983	0.00909347	0.000545236	1.45203	0.0429429	0.00450754	1.45	0.0971193	0.0130666
1.7481	0.0091645	0.000532441	1.5021	0.0442718	0.00472214	1.5	0.100437	0.0138165
1.80637	0.00899742	0.000544806	1.55217	0.0457003	0.0049256	1.55	0.103743	0.0146375
1.86464	0.00931633	0.00051029	1.60224	0.0471016	0.00513038	1.6	0.106904	0.0154628
1.92291	0.00942127	0.0005069	1.65231	0.0483701	0.00533578	1.65	0.109401	0.0160133
1.98118	0.00949175	0.00049309	1.70238	0.0498628	0.00554732	1.7	0.11226	0.0166153
			1.75245	0.0515806	0.00576867	1.75	0.1151	0.0170876
			1.80252	0.0532489	0.00601349	1.8	0.117508	0.0174866
			1.85259	0.0547211	0.00624234	1.85	0.120076	0.0178809
			1.90266	0.0560886	0.00646207	1.9	0.122616	0.0183663
			1.95273	0.0574705	0.00672694	1.95	0.125458	0.0190449
						2	0.126258	0.0189327

## Sheet: Panel B
		Please see Dryad and Github for raw data and plotting information

## Sheet: Panel C
diffusion coefficients in histogram
no ATP	ADP	ATP	ATPgS
0.0480674	0.00275571	0.0345284	0.0194418
0.00293431	0.0127857	0.0267547	0.0239108
0.0322449	0.0338038	0.00676252	0.031585
0.00750164	0.00859422	0.0154112	0.0366658
0.0260741	0.116149	0.00987405	0.0273079
0.0475253	0.0133794	0.0239336	0.0414681
0.0243233	0.00284689	0.0469807	0.0267347
0.0523349	0.0147667	0.0472759	0.0281589
0.0796309	0.00752349	0.00457536	0.0925851
0.1305	0.0156909	0.0333326	0.0578886
0.0030893	0.0198478	0.00825832	0.0296608
0.0600046	0.0113015	0.0263592	0.060601
0.101504	0.0082826	0.0198205	0.0701572
0.0159699	0.0115018	0.0142149	0.030364
0.0148077	0.00657672	0.00659953	0.02198
0.0150889	0.00536923	0.0223933	0.0710367
0.00791935	0.00137138	0.0394743	0.0177694
0.00277393	0.0284884	0.0173205	0.0255304
0.0790849	0.00595557	0.0210706	0.0480364
0.0489457	0.00151959	0.00828688	0.00476549
0.0270382	0.00170277	0.0287792	0.0185193
0.0210992	0.00205191	0.0201933	0.0195862
0.0518832	0.00961682	0.0154287	0.0419594
0.0512973	0.00389054	0.0368383	0.0126795
0.021408	0.0129923	0.00429767	0.13529
0.0198649	0.0148967	0.0268331	0.024806
0.0219777	0.00773991	0.0154518	0.0228349
0.0228869	0.00899471	0.0654612	0.0432833
0.010197	0.0672707	0.0207717	0.0382263
0.0611069	0.00188224	0.00704099	0.0164622
0.0527285	0.0195818	0.00730693	0.0213995
0.0372031	0.0123311	0.0492297	0.0263474
0.0449031	0.00892921	0.097716	0.0799779
0.00909072	0.0127182	0.0470439	0.0188875
0.0286619	0.00509689	0.03432	0.0556902
0.0040557	0.00432683	0.0742498	0.0256063
0.00865328	0.00117771	0.00748904	0.0678625
0.0103897	0.00280212	0.012034	0.0206759
0.0209946	0.012152	0.0234075	0.0757431
0.0220918	0.0349193	0.0271288	0.0364505
0.00819591	0.00433175	0.0520664	0.0106998
0.00459238	0.0147938	0.00996083	0.00312519
0.0217097	0.00124787	0.0205134	0.0315093
0.00464566	0.0174091	0.015584	0.0371748
0.0570535	0.00041439	0.00403984	0.0232682
0.00437158	0.0288598	0.0146724	0.0562253
0.016128	0.00676417	0.015327	0.0128688
0.00559652	0.00817918	0.0115314	0.0302978
0.0322515	0.0334296	0.0456552	0.019819
0.00353417	0.00214022	0.00601491	0.0768625
0.00514047	0.0163183	0.00910108	0.00350819
0.0205663	0.0103761	0.0146645	0.0154846
0.00917726	0.0055505	0.00881195	0.0197933
0.0096981	0.0447624	0.0460301	0.0153023
0.0144079	0.0177439	0.0877658	0.0534856
0.0163202	0.024516	0.0125193	0.0222863
0.0110584	0.010276	0.00996139	0.0102559
0.0023605	0.0218042	0.00913334	0.027674
0.0406576	0.0144571	0.0324929	0.0533096
0.0507424	0.00878658	0.00523201	0.00644689
0.0348252	0.00983726	0.0132206	0.0367197
0.0522751	0.0198817	0.0238826	0.0231795
0.00468247	0.0158182	0.0248708	0.0892004
0.00474449	0.0221485	0.00666823	0.0181668
0.0284197	0.0143397	0.0498515	0.024068
0.0176187	0.00864259	0.0167439	0.0124001
0.026842	0.0167944	0.0099225	0.011306
0.0100998	0.0901234	0.00185663	0.0590728
0.00235418	0.0109163	0.0117831	0.0619844
0.00460972	0.0149086	0.0234501	0.108942
0.0237695	0.00493299	0.0195331	0.0246476
0.0161309	0.00334132	0.0385304	0.0179951
0.0298678	0.00861585	0.00975657	0.0685445
0.00769298	0.0140254	0.0191787	0.0508648
0.00920159	0.0265362	0.0151857	0.0221112
0.0333654	0.00184645	0.045798	0.00266787
0.0123088	0.00296312	0.00941797	0.00825774
0.0176534	0.0114058	0.010448	0.0136387
0.023005	0.00239745	0.0198596	0.0259201
0.00431738	0.0028946	0.04178	0.00399932
0.00445172	0.00328841	0.00533712	0.0216595
0.0206844	0.0413242	0.0220683	0.0313659
0.00302463	0.00465278	0.00524444	0.0351633
0.00980614	0.00497729	0.00312604	0.035333
0.00270573	0.0158941	0.00821293	0.0389706
0.00177522	0.0106482	0.00751575	0.0240763
0.0321222	0.00702566	0.0138909	0.0184356
0.00798704	0.0128904	0.0430575	0.011993
0.00210784	0.00426403	0.0492383	0.0247367
0.0169494	0.0214793	0.03219	0.0519203
0.00943084	0.0116484	0.0169203	0.0560785
0.00292913	0.0261136	0.0389009	0.0234061
0.00436979	0.0191183	0.0499629	0.0104603
0.00431771	0.0269387	0.0230297	0.027176
0.0436144	0.0111819	0.0315755	0.0134818
0.0241459	0.00528214	0.0389625	0.0405225
0.0202591	0.00274947	0.0210448	0.00172494
0.0129259	0.0012275	0.0226634	0.0483949
0.0179809	0.00331224	0.033593	0.0469944
0.0121943	0.000624193	0.0294811	0.0212708
0.0277041	0.00261128	0.0357482	0.0161954
0.0078175	0.0035525	0.0136627	0.0219447
0.044471	0.0197088	0.00477362	0.0203842
0.00276522	0.00946056	0.0394086	0.0172861
0.0119834	0.00893506	0.0146033	0.0135277
0.0171564	0.010757	0.0235655	0.0148347
0.0035801	0.0134593	0.00929589	0.0317482
0.0111029	0.00225599	0.0752675	0.0322516
0.00685357	0.00132481	0.00612934	0.0530337
0.00638479	0.0131619	0.0382495	0.0121609
0.045277	0.00901069	0.0341555	0.0123386
0.0246682	0.0104573	0.0373395	0.0288694
0.0260751	0.00150021	0.00861721	0.0267705
0.0155773	0.00435928	0.0165503	0.0173771
0.027903	0.0069449	0.00801926	0.0800109
0.0151221	0.0234681	0.0466884	0.045334
0.0953952	0.0144643	0.0316981	0.0332321
0.0293293	0.0470885	0.0345777	0.0229719
0.00412462	0.0401934	0.0478179	0.0254645
0.00791697	0.00327919	0.00350416	0.0071205
0.0199735	0.00285956	0.0267139	0.0227605
0.00633392	0.019283	0.0183384	0.0222771
0.000971557	0.0267354	0.00451598	0.029978
0.00840717	0.0355862	0.0187473	0.00627907
0.0232812	0.0190402	0.0148896	0.0697693
0.00136827	0.00321326	0.0132702	0.0101874
0.0662499	0.0190087	0.0530491	0.0169753
0.0166329	0.00440241	0.0452317	0.00752644
0.011391	0.00721661	0.0110163	0.00723083
0.0104204	0.00200502	0.0139307	0.000887418
0.0210235	0.00307958	0.0272866	0.0170699
0.0707122	0.00680678	0.130366	0.0805143
0.00696611	0.00671842	0.0086016	0.00169185
0.0288484	0.00464713	0.00862363	0.0539601
0.0227028	0.0169551	0.0211435	0.0918714
0.0545155	0.00332386	0.00767272	0.0744615
0.0460338	0.00150919	0.034292	0.0563293
0.00296481	0.00216712	0.0287896	0.0372361
0.0099939	0.0482829	0.0273879	0.0757653
0.00636668	0.00816649	0.0158444	0.0468653
0.0277054	0.0110585	0.0166282	0.0379719
0.00118413	0.104368	0.0207213	0.114048
0.0149668	0.0238136	0.0122548	0.0408206
0.0117204	0.00388868	0.0351202	0.0213157
0.0966557	0.0268195	0.0319389	0.0413567
0.012165	0.0125166	0.00586869	0.0215645
0.0541891	0.00405513	0.0242339	0.0459536
0.0426531	0.0161369	0.0237092	0.0121216
0.0957975	0.00615147	0.0701014	0.0248037
0.0147375	0.0501286	0.0235075	0.0220464
0.00698797	0.00862118	0.0269316	0.0197262
0.0119651	0.00694748	0.0357804	0.00883133
0.00827899	0.00772494	0.0183358	0.0196223
0.00921292	0.00230026	0.0389722	0.0297295
0.0151899	0.00924777	0.0241146	0.0561204
0.00195855	0.0378678	0.0522577	0.0319377
0.000316419	0.0738007	0.0036097	0.0550439
0.00192052	0.0176621	0.0199065	0.0555764
0.0065035	0.0558585	0.0350734	0.037582
0.00308556	0.0153259	0.0270166	0.0898962
0.0042753	0.0097345	0.0145973	0.011126
0.00837096	0.0243612	0.0212919	0.0530669
0.00924822	0.0370861	0.0374962	0.0933293
0.00763089	0.0190898	0.0293709	0.003829
0.00378407	0.0426558	0.0237819	0.092895
0.00928285	0.0226957	0.0228631	0.0129777
0.0219739	0.0435311	0.0376373	0.014572
0.00416832	0.0066475	0.012045	0.033026
0.020592	0.00868027	0.00219963	0.0027054
0.00618006	0.00621659	0.0187524	0.0102475
0.0172598	0.00926383	0.0432481	0.00827226
0.0146121	0.0266338	0.0280316	0.0122447
0.0243437	0.0101145	0.0281963	0.00885099
0.0126124	0.0058229	0.0169898	0.0537333
0.0276058	0.00529808	0.0498718	0.046548
0.0174388	0.00304964	0.0306522	0.00638344
0.0243634	0.00975899	0.0324912	0.0132104
0.0226379	0.0073283	0.0368362	0.0242487
0.00604907	0.0059404	0.0143825	0.108716
0.00713465	0.00908466	0.0168846	0.0116962
0.00169633	0.00852283	0.023443	0.0533212
0.00143575	0.00628696	0.0109037	0.0813774
0.00703645	0.00543182	0.0103866	0.030873
0.0029399	0.0164106	0.0116124	0.0298092
0.000774046	0.011076	0.0142505	0.0201512
0.00451822	0.0341438	0.012303	0.0180643
0.0016848	0.0121559	0.0256324	0.00395963
0.000857607	0.00168451	0.0123941	0.0360373
0.00111297	0.017551	0.0402994	0.0279218
0.00402709	0.00342189	0.0236296	0.0108485
0.00188684	0.00560551	0.0223365	0.0243364
0.00702243	0.00732746	0.0212333	0.00923958
0.00199296	0.0137505	0.00508652	0.0534524
0.00778979	0.015219	0.00165917	0.00236369
0.0041842	0.00276639	0.023819	0.0695528
0.00118783	0.00101277	0.0319254	0.0681301
0.0299075	0.0116838	0.018546	0.0185136
0.0450481	0.00360799	0.0228052	0.0417351
0.0453161	0.0260426	0.0303086	0.0318952
0.0535669	0.00982394	0.0130513	0.00979876
0.0167347	0.000896167	0.0158965	0.0163116
0.0125247	0.0134395	0.00337747	0.041833
0.0158361	0.0165091	0.0229112	0.0243348
0.00387437	0.00277797	0.0248888	0.0269987
0.0216099	0.0101362	0.00909643	0.0393492
0.00187944	0.00534739	0.0286291	0.0654212
0.0133052	0.0174334	0.0155546	0.0330329
0.0103933	0.00448808	0.0280453	0.0371611
0.00568508	0.0045406	0.0289805	0.0167278
0.0183555	0.0111177	0.0303505	0.0495379
0.00205131	0.00838222	0.0374675	0.0470682
0.0193395	0.00948155	0.0229191	0.00415223
0.0192767	0.00240174	0.032727	0.03418
0.0196649	0.00421726	0.0109272	0.0329078
0.0103123	0.0115003	0.0168425	0.10697
0.0155451	0.00300413	0.0258041	0.0527085
0.0185637	0.00192642	0.0150155	0.0355951
0.0610909	0.0120652	0.0361075	0.0101379
0.0779041	0.00140724	0.0260374	0.0113477
0.00336555	0.00460466	0.00889959	0.0303355
0.00340601	0.00231624	0.0930155	0.0361838
0.0472311	0.00696521	0.0462636	0.0469951
0.00626071	0.00714845	0.0117204	0.0381824
0.00408978	0.0258225	0.0265023	0.0180721
0.00835839	0.00390733	0.0128474	0.0363808
0.0246995	0.00480752	0.0513814	0.0110795
0.000698371	0.00613792	0.0047301	0.00173735
0.0512836	0.00706535	0.0253355	0.0243329
0.00181069	0.00052694	0.0399698	0.0748487
0.0140168	0.00485447	0.0109232	0.066683
0.0151063	0.00231002	0.0347783	0.0207745
0.0350402	0.0122022	0.0543182	0.0129826
0.00517835	0.024867	0.0219866	0.0105009
0.00474292	0.00822929	0.0900793	0.000125842
0.00679324	0.00287587	0.0389746	0.00585325
0.00133897	0.0383878	0.0554279	0.0514679
0.000701678	0.0124501	0.0279968	0.0149068
0.0154519	0.00239336	0.0273165	0.0764866
0.0497534	0.0207607	0.0297428	0.00330767
0.00184714	0.00642123	0.00906166	0.0175394
0.00119656	0.004239	0.0243041	0.0426434
0.00294501	0.00667715	0.0223915	0.0014181
0.0174982	0.00300122	0.0893533	0.0630618
0.0160895	0.138834	0.0560418	0.0577881
0.00252714	0.0616097	0.0779553	0.0682529
	0.0521413	0.0321237	0.0599834
	0.0628585	0.0277921	0.0232169
	0.00310168	0.026988	0.00428725
	0.00331442	0.0683474	0.00987024
	0.0370809	0.0169781	0.0419191
	0.0100288	0.0172246	0.0486433
	0.00753792	0.0213886	0.0184859
	0.0646972	0.0359121	0.0273451
	0.00407332	0.0636676	0.0235123
	0.083077	0.0282484	0.00718029
	0.00813094	0.0442352	0.0235783
	0.0439515	0.0343944	0.0142857
	0.101381	0.0223852	0.0632488
	0.0690504	0.00518841	0.027179
	0.0254873	0.0320225	0.139509
	0.0834934	0.0489416	0.0648441
	0.0380268	0.0589816	0.0205486
	0.00620453	0.0208725	0.00425176
	0.0581257	0.0327866	0.0198138
	0.0110799	0.0325112	0.00934858
	0.114298	0.0382326	0.0103472
	0.0194299	0.028347	0.00871339
	0.0918951	0.0288474	0.0486019
	0.00403824	0.0011822	0.0162166
	0.069616	0.089703	0.0743571
	0.0538176	0.0554273	0.0342502
	0.0193005	0.0166736	0.0416755
	0.0102883	0.0338615	0.0353458
	0.0404196	0.020596	0.0193857
	0.0958487	0.00492575	0.0116142
	0.0106698	0.10033	0.0290033
	0.041424	0.0254945	0.0529019
	0.0505308	0.0204352	0.109669
	0.0350715	0.0285127	0.0661784
	0.0348189	0.0185004	0.0114673
	0.0786488	0.052168	0.0170579
	0.0426817	0.00398914	0.11479
	0.0887363	0.0365692	0.0861219
	0.0247987	0.0244466
	0.00811616	0.0540861
	0.100546	0.0361425
	0.0170653	0.0589402
	0.102733	0.088347
	0.00337517	0.0446991
	0.0392253	0.0223775
	0.0305439	0.00743906
	0.0833069	0.102009
	0.112532	0.0158217
	0.00876094	0.0233424
	0.0523892	0.0263736
	0.0429901	0.10098
	0.0397265	0.0616359
	0.00770143	0.00625748
	0.125846	0.0347057
	0.0256193	0.0216818
	0.0847677	0.0203732
	0.0262799	0.049189
	0.0161889	0.052907
	0.0493276	0.00971505
	0.0751683	0.0296474
	0.0600657	0.0208507
	0.0691688	0.0320496
	0.0131426	0.0263906
	0.094625	0.00975881
	0.109497	0.0431611
	0.0503704	0.0084139
	0.0814706	0.0315653
	0.0326706	0.0368363
		0.0236686
		0.0207031
		0.0625314
		0.0200647
		0.00633039
		0.0420716
		0.0290973
		0.0557952
		0.0239611
		0.0102379
		0.00451743
		0.0475569
		0.102128
		0.0564201
		0.0263906
		0.0373699
		0.0685249
		0.00684637
		0.0591948
		0.0784799
		0.0329934
		0.0218624
		0.0789058
		0.0615684
		0.0726423
		0.0554977
		0.0689532
		0.104813
		0.0936455
		0.0473717
		0.0544426
		0.0204842
		0.0510926
		0.0410931
		0.0910802
		0.0461409
		0.0551537
		0.0132598
		0.0194035
		0.0522424
		0.0382737
		0.0425949
		0.0254664
		0.040616
		0.0504707
		0.0258434
		0.0502715
		0.0431353
		0.0618779
		0.0652085
		0.00602205
		0.0116172
		0.0578216
		0.116266
		0.0100576
		0.0311135
		0.0520737
		0.0141926
		0.0452939
		0.0789914
		0.0141632
		0.0564441
		0.0925487
		0.0249024
		0.00145388
		0.0110521
		0.00849559
		0.0529429
		0.00688176
		0.13279
		0.00421943
		0.00813556
		0.0572464
		0.0410056
		0.0210739
		0.0349451
		0.0612537
		0.00988072
		0.0232609
		0.0926499
		0.0156191
		0.0937079
		0.0261227
		0.0586172
		0.0626324
		0.00980049
		0.0669597
		0.0147309
		0.0165138
		0.0400261
		0.0260052
		0.0255869
		0.0113506
		0.0190757
		0.0267722
		0.0635942
		0.0208529
		0.0769053
		0.0188301
		0.0138824
		0.0304823
		0.129422
		0.0317037
		0.026109
		0.108405
		0.0149665
		0.018715
		0.0698776
		0.062422
		0.0435019
		0.00733634
		0.00810915
		0.0105142
		0.0199457
		0.00269589
		0.0223171
		0.00543031
		0.0204592
		0.00947823
		0.00932195
		0.0202523
		0.013955
		0.00731267
		0.0242981
		0.104151
		0.0116641
		0.0515981
		0.0201667
		0.0472813
		0.0501818
		0.010558
		0.0157525
		0.00659048
		0.0103371
		0.00613808
		0.0111568
		0.0198399
		0.0133372
		0.0220025
		0.0236882
		0.0174088
		0.0279127
		0.00277202
		0.00566216
		0.00237772
		0.0219992
		0.00393804
		0.0218985
		0.0149296

## Sheet: Panel D
	dCas9	no ATP	ADP	ATP	ATPgS
median	0.000268072	0.0126124	0.0110585	0.0239473	0.0263474
SEM (median)	0.000366547	0.00167932	0.00186519	0.00138659	0.00193693
Mann-Witney U-Test:	h =	p =
dCas9 and no ATP	1	4.7228e-22
no ATP and ADP	0	0.75532
no ATP and ATP	1	1.769e-15
ATP and ATPgS	0	0.091205

## Sheet: Panel E
		dCas9	no ATP	ADP	ATP	ATPgS
	% Immobile	97.7273	32.2449	32.8125	9.1684	7.8767
