# Supplementary material for: ATP binding facilitates target search of SWR1 chromatin remodeler by promoting one-dimensional diffusion on DNA
Source: eLife journal article supplement (doi:10.7554/elife.77352), 2022-07-25
Supplement: supp [file Figure 4.xlsx]

## Sheet: Panel A
SWR1				Swc2
25mM KCl	70mM KCl	200mM KCl		25mM KCl	70mM KCl	150mM KCl
0.019629	0.0345284	0.0147429		6.62507	1.41496	1.37141
0.00749483	0.0267547	0.0427683		0.661359	11.414	1.58082
0.0099531	0.00676252	0.00512281		2.00898	2.28229	0.680358
0.0284718	0.0154112	0.0354008		0.47638	1.81194	1.40628
0.00905898	0.00987405	0.0113813		0.109418	0.281483	4.14162
0.0138005	0.0239336	0.0375868		5.79622	2.17405	2.05822
0.00350165	0.0469807	0.0803602		0.401671	0.285672	1.17579
0.00740293	0.0472759	0.0568227		0.197645	1.86035	2.32669
0.027316	0.00457536	0.0136725		0.116815	2.10515	2.19048
0.00308714	0.0333326	0.108669		1.6423	0.564555	2.76928
0.00504772	0.00825832	0.0431566		0.689938	0.617246	1.36662
0.0195264	0.0263592	0.0235779		0.912403	0.532115	1.42628
0.0291531	0.0198205	0.0142063		0.700735	1.55836	1.09405
0.0243094	0.0142149	0.00264736		1.9855	0.345212	0.563415
0.00101573	0.00659953	0.114932		0.389686	0.93254	1.07536
0.0346386	0.0223933	0.0260839		0.845508	0.422556	1.52389
0.0272647	0.0394743	0.0266319		0.341707	1.5553	3.68699
0.0116643	0.0173205	0.153333		0.259871	0.789397	1.42504
0.0138512	0.0210706	0.0293263		0.710957	0.541562	1.65824
0.0154711	0.00828688	0.0532085		0.311062	0.115416	0.76008
0.0705963	0.0287792	0.0340425		0.449041	0.348647	1.59437
0.0369229	0.0201933	0.049166		0.950621	1.7212	1.54869
0.0192917	0.0154287	0.0400752		0.0783955	0.672308	0.852332
0.015474	0.0368383	0.0339287		0.346584	0.209014	0.580376
0.0103977	0.00429767	0.0934299		1.13905	1.58871	3.29321
0.0543748	0.0268331	0.0927004		0.127043	0.495669	1.08201
0.018864	0.0154518	0.0683074		0.863369	1.73953	1.24983
0.0264138	0.0654612	0.0722208		0.277843	1.11939	1.55639
0.0268256	0.0207717	0.0369191		0.467676	1.43635	0.999848
0.0702361	0.00704099	0.0103568		0.501589	1.80241	0.96971
0.0272723	0.00730693	0.037279		0.34823	3.84066	1.4461
0.0211225	0.0492297	0.043258		0.163603	1.30723	0.754961
0.00344599	0.097716	0.0232556		0.32758	0.50586	2.84643
0.018087	0.0470439	0.075705		0.196621	1.48024	1.82766
0.00687611	0.03432	0.0246266		0.1502	0.97324	0.980117
0.00568509	0.0742498	0.117337		1.09314	0.844644	1.71846
0.0114313	0.00748904	0.0530827		2.40234	2.78661	1.11158
0.00458427	0.012034	0.0569094		2.09863	1.83183	2.62374
0.0240834	0.0234075	0.0180684		0.920507	0.935517	4.62164
0.0197985	0.0271288	0.0253816		0.975659	1.43733	2.96984
0.0100387	0.0520664	0.0872981		1.24288	1.48822	2.35612
0.00873619	0.00996083	0.0441897		1.07138	3.12335	0.775348
0.00595999	0.0205134	0.0111823		0.323954	0.961385	2.23361
0.00418936	0.015584	0.0366568		0.379572	0.787075	1.46215
0.0159448	0.00403984	0.0139699		0.894211	1.01799	1.94375
0.0212167	0.0146724	0.0378149		1.28761	1.03147	0.611953
0.0145487	0.015327	0.0749944		1.19939	0.334123	1.71769
0.00722634	0.0115314	0.0401919		0.592167	0.530353	1.92321
0.0134434	0.0456552	0.127612		1.32741	0.602251	2.29276
0.021192	0.00601491	0.144259		1.51404	1.71893	1.6008
0.0376546	0.00910108	0.051218		1.14807	1.93445	2.76024
0.0119553	0.0146645	0.0400103		0.437142	2.57633	0.764694
0.0257846	0.00881195	0.0369918		0.908707	2.69544	11.8447
0.0389966	0.0460301	0.0534516		0.469787	2.2508	1.42416
0.0243443	0.0877658	0.0532653		0.676106	1.02214	1.73969
0.0231034	0.0125193	0.0848491		0.770951	0.688189	3.45404
0.140312	0.00996139	0.02428		0.218012	1.68255	1.36825
0.0149385	0.00913334	0.0627221		0.404155	0.874997	0.778599
0.0148332	0.0324929	0.10179		1.36864	1.40979	0.504237
0.00244871	0.00523201	0.0324485		1.00282	0.992868	1.01639
0.0233571	0.0132206	0.03132		0.251959	0.833378	2.32834
0.00822367	0.0238826	0.0414002		0.236853	1.01429	2.363
0.016229	0.0248708	0.0609778		1.12424	1.08797	0.22017
0.0175078	0.00666823	0.0409501		0.868322	1.04693	2.4355
0.0121837	0.0498515	0.0368666		0.935779	0.966238	1.60192
0.0137833	0.0167439	0.0671911		0.297638	1.46149	2.36109
0.0102858	0.0099225	0.0267205		0.527718	0.657571	1.15052
0.0248085	0.00185663	0.0461687		0.364071	1.12837	1.6978
0.0154007	0.0117831	0.0412016		0.532068	1.45274	1.44486
0.0155264	0.0234501	0.0140095		0.561047	1.21965	1.48918
0.0146719	0.0195331	0.0704721		0.0462765	1.9948	3.38204
0.0117839	0.0385304	0.0140908		0.153699	1.14228	1.05897
0.0105211	0.00975657	0.094058		0.893007	0.414767	3.20615
0.019753	0.0191787	0.0884027		1.12518	0.715737	0.759765
0.00508894	0.0151857	0.0179244		0.273234	2.99069	1.03541
0.025673	0.045798	0.00776248		0.445664	0.600737	1.88131
0.00551255	0.00941797	0.0369849		0.333371	1.87578	1.86305
0.0149626	0.010448	0.0635155		0.242875	0.979992	2.60826
0.0079876	0.0198596	0.0585661		2.34429	0.863553	2.52223
0.0413584	0.04178	0.0484848		3.03105	2.71897	1.1081
0.00768841	0.00533712	0.0472047		0.937453	5.07943	6.47439
0.00816207	0.0220683	0.0272349		1.60713	1.02098
0.000901696	0.00524444	0.10462		0.989265	2.20789
0.0109135	0.00312604	0.0288973		1.24617	1.76989
0.00844127	0.00821293	0.0777338		2.60343	1.07237
0.0146645	0.00751575	0.023228		1.57216	1.64287
0.0171874	0.0138909	0.0288241		0.926476	0.402906
0.0143861	0.0430575	0.0494586		0.620813	0.488289
0.0493755	0.0492383	0.0291108		1.17581	0.758355
0.0118071	0.03219	0.0301652		0.911608	1.01798
0.00807786	0.0169203	0.0414113		1.43904	0.669667
0.00911675	0.0389009	0.0283026		0.444197	2.52672
0.0261101	0.0499629	0.049926		0.713148	1.1014
0.0174073	0.0230297	0.0429527		4.31334	1.52551
0.0205143	0.0315755	0.127966		0.7329	1.17047
0.0257723	0.0389625	0.0219023		0.27251	0.31564
0.00147962	0.0210448	0.0635827		0.421326	1.0926
0.0382177	0.0226634	0.0444925		0.450636	0.695383
0.0288939	0.033593	0.0263109		0.998362	0.906998
0.0147006	0.0294811	0.0678887		1.01125	1.22949
0.00558953	0.0357482	0.0469955		1.16868	0.525618
0.00456737	0.0136627	0.0554001		1.04061	1.17902
0.0188235	0.00477362	0.0165131		2.52588	1.33836
0.00625014	0.0394086	0.0499694		1.21457	0.0718213
0.0176569	0.0146033	0.140821		0.837303	1.26523
0.0051028	0.0235655	0.0393834		1.03482	2.39298
0.0176481	0.00929589	0.0417941		1.09661	1.00502
0.0136132	0.0752675	0.0148882		0.972201	1.2189
0.00878455	0.00612934	0.0788104		0.381358	3.9503
0.0179504	0.0382495	0.00361363		1.04013	1.80216
0.0192122	0.0341555	0.220068		1.14449	0.475547
0.0380083	0.0373395	0.0421701		1.13253	0.51474
0.00187331	0.00861721	0.0223803		2.4512	0.566844
0.0317652	0.0165503	0.0179818		3.77889	0.415405
0.0117654	0.00801926	0.0299571		2.25687	0.894327
0.00345698	0.0466884	0.067929		0.973335	1.03803
0.012051	0.0316981	0.079408		0.116746	0.8836
0.00738707	0.0345777	0.028789		1.20554
0.0223076	0.0478179	0.0801747		0.538074
0.0128186	0.00350416	0.0762612		0.476391
0.0127939	0.0267139	0.0249147		0.99243
0.0246128	0.0183384	0.0463118		0.72536
0.0215726	0.00451598	0.0723593		0.523541
0.030323	0.0187473	0.0447476		0.461107
0.00831266	0.0148896	0.0646204		1.35112
0.0153969	0.0132702	0.0326828		1.23633
0.0294747	0.0530491	0.0224974		0.68001
0.0114672	0.0452317	0.03487		1.40839
0.0163988	0.0110163	0.109098		0.0629973
0.0137912	0.0139307	0.0407318		0.794161
0.0039496	0.0272866	0.0718613		0.813285
0.0138675	0.130366	0.034489		0.219261
0.00645178	0.0086016	0.00452032		0.229648
0.00910138	0.00862363	0.00908759		0.642837
0.0149698	0.0211435	0.0184798		0.833191
0.00570049	0.00767272			0.32238
0.036182	0.034292			0.371778
0.0321281	0.0287896			0.922911
0.0228187	0.0273879			0.103326
0.0155974	0.0158444			0.408421
0.0282321	0.0166282			0.555815
0.0153767	0.0207213			0.636273
0.0213957	0.0122548			0.468308
0.0146344	0.0351202			0.436747
0.00362456	0.0319389			0.915963
0.0263272	0.00586869			0.787963
0.0193163	0.0242339			0.568402
0.024442	0.0237092			0.332
0.0185501	0.0701014			0.734666
0.0269828	0.0235075			0.598674
0.0252394	0.0269316			0.427653
0.0112911	0.0357804			1.10044
0.00219089	0.0183358			0.824675
0.0196415	0.0389722			0.470858
0.0223183	0.0241146
0.0097704	0.0522577
0.0112959	0.0036097
0.0238563	0.0199065
	0.0350734
	0.0270166
	0.0145973
	0.0212919
	0.0374962
	0.0293709
	0.0237819
	0.0228631
	0.0376373
	0.012045
	0.00219963
	0.0187524
	0.0432481
	0.0280316
	0.0281963
	0.0169898
	0.0498718
	0.0306522
	0.0324912
	0.0368362
	0.0143825
	0.0168846
	0.023443
	0.0109037
	0.0103866
	0.0116124
	0.0142505
	0.012303
	0.0256324
	0.0123941
	0.0402994
	0.0236296
	0.0223365
	0.0212333
	0.00508652
	0.00165917
	0.023819
	0.0319254
	0.018546
	0.0228052
	0.0303086
	0.0130513
	0.0158965
	0.00337747
	0.0229112
	0.0248888
	0.00909643
	0.0286291
	0.0155546
	0.0280453
	0.0289805
	0.0303505
	0.0374675
	0.0229191
	0.032727
	0.0109272
	0.0168425
	0.0258041
	0.0150155
	0.0361075
	0.0260374
	0.00889959
	0.0930155
	0.0462636
	0.0117204
	0.0265023
	0.0128474
	0.0513814
	0.0047301
	0.0253355
	0.0399698
	0.0109232
	0.0347783
	0.0543182
	0.0219866
	0.0900793
	0.0389746
	0.0554279
	0.0279968
	0.0273165
	0.0297428
	0.00906166
	0.0243041
	0.0223915
	0.148472
	0.0893533
	0.0560418
	0.0779553
	0.0321237
	0.0277921
	0.026988
	0.0683474
	0.217169
	0.0169781
	0.0172246
	0.0213886
	0.0359121
	0.0636676
	0.0282484
	0.0442352
	0.0343944
	0.0223852
	0.00518841
	0.0320225
	0.0489416
	0.180995
	0.0589816
	0.0208725
	0.0327866
	0.0325112
	0.0382326
	0.028347
	0.0288474
	0.0011822
	0.089703
	0.0554273
	0.0166736
	0.0338615
	0.020596
	0.00492575
	0.10033
	0.0254945
	0.0204352
	0.0285127
	0.0185004
	0.052168
	0.00398914
	0.0365692
	0.0244466
	0.0540861
	0.0361425
	0.169294
	0.0589402
	0.088347
	0.0446991
	0.0223775
	0.00743906
	0.102009
	0.0158217
	0.0233424
	0.0263736
	0.10098
	0.0616359
	0.00625748
	0.0347057
	0.0216818
	0.0203732
	0.049189
	0.052907
	0.00971505
	0.0296474
	0.0208507
	0.0320496
	0.0263906
	0.00975881
	0.0431611
	0.0084139
	0.0315653
	0.0368363
	0.473008
	0.0236686
	0.0207031
	0.0625314
	0.0200647
	0.00633039
	0.0420716
	0.0290973
	0.0557952
	0.0239611
	0.0102379
	0.00451743
	0.0475569
	0.102128
	0.0564201
	0.0263906
	0.0373699
	0.0685249
	0.00684637
	0.0591948
	0.0784799
	0.0329934
	0.0218624
	0.0789058
	0.0615684
	0.0726423
	0.0554977
	0.238456
	0.0689532
	0.104813
	0.0936455
	0.0473717
	0.0544426
	0.0204842
	0.0510926
	0.0410931
	0.0910802
	0.0461409
	0.0551537
	0.0132598
	0.0194035
	0.0522424
	0.0382737
	0.0425949
	0.0254664
	0.040616
	0.0504707
	0.0258434
	0.0502715
	0.0431353
	0.0618779
	0.0652085
	0.00602205
	0.0116172
	0.0578216
	0.116266
	0.0100576
	0.0311135
	0.0520737
	0.0141926
	0.0452939
	0.0789914
	0.0141632
	0.0564441
	0.0925487
	0.0249024
	0.00145388
	0.0110521
	0.00849559
	0.0529429
	0.00688176
	0.13279
	0.00421943
	0.00813556
	0.0572464
	0.0410056
	0.371706
	0.0210739
	0.0349451
	0.0612537
	0.00988072
	0.0232609
	0.0926499
	0.0156191
	0.0937079
	0.0261227
	0.0586172
	0.0626324
	0.00980049
	0.0669597
	0.0147309
	0.0165138
	0.0400261
	0.0260052
	0.0255869
	0.0113506
	0.0190757
	0.0267722
	0.0635942
	0.0208529
	0.0769053
	0.0188301
	0.0138824
	0.0304823
	0.129422
	0.0317037
	0.026109
	0.108405
	0.0149665
	0.018715
	0.0698776
	0.062422
	0.0435019
	0.00733634
	0.00810915
	0.0105142
	0.0199457
	0.00269589
	0.0223171
	0.00543031
	0.0204592
	0.00947823
	0.00932195
	0.0202523
	0.013955
	0.00731267
	0.0242981
	0.104151
	0.0116641
	0.0515981
	0.0201667
	0.0472813
	0.0501818
	0.010558
	0.0157525
	0.00659048
	0.0103371
	0.00613808
	0.0111568
	0.0198399
	0.0133372
	0.0220025
	0.0236882
	0.0174088
	0.0279127
	0.00277202
	0.00566216
	0.00237772
	0.0219992
	0.00393804
	0.0218985
	0.0149296

## Sheet: Panel B
0.77883	3.33499	2.05691	3.994	0.93859	1.65751	0.83874	1.35796	2.1967	0.47928	7.5886	5.991	4.13379	1.57763	2.49625	4.41337	1.23814	0.49925	1.03844	1.47778	1.65751	4.11382	1.23814	0.77883	2.75586	2.97553	7.32899	0.9985	5.85121	1.55766	2.27658	1.11832	11.9221	2.97553	0.49925	1.91712	2.55616	1.23814	1.93709	2.1967	0.97853	1.35796	1.81727	5.87118	6.03094	0.7988	0.73889	1.85721	0.55916	1.27808
SWR1										Swc2
25mM KCl			70mM KCl			200mM KCl				25mM KCl			70mM KCl			150mM KCl
Trace Lengths	Time(s)	1-CDF	Trace Lengths	Time(s)	1-CDF	Trace Lengths	Time(s)	1-CDF		Trace Lengths	Time(s)	1-CDF	Trace Lengths	Time(s)	1-CDF	Trace Lengths	Time(s)	1-CDF
7.2	0	1	15.2961	0	1	4.85	0	1		1.21817	0	1	0.77883	0	1	8.06788	0	1
23.7	0	0.993631	21.9264	0	0.997835	3.45	0	0.984733		1.23814	0	0.993421	3.33499	0	0.991304	5.3919	0	0.987342
7.55	0.25	0.987261	10.3727	0.02724	0.995671	3.6	0.25	0.977099		2.5961	0.11982	0.986842	2.05691	0.09985	0.982609	2.91562	0.01997	0.974684
5.55	0.75	0.980892	8.3187	0.13518	0.993506	21.35	0.4	0.961832		1.21817	0.17973	0.973684	3.994	0.11982	0.965217	0.91862	0.03994	0.962025
12.25	1.35	0.974522	70.2982	0.17724	0.989177	3.85	0.5	0.954198		1.01847	0.1997	0.967105	0.93859	0.13979	0.956522	1.03844	0.07988	0.949367
24.9	1.45	0.968153	14.6348	0.22724	0.987013	4.7	0.7	0.946565		4.37343	0.23964	0.960526	1.65751	0.17973	0.947826	3.61457	0.11982	0.924051
8.5	1.7	0.955414	12.0672	0.24783	0.984848	4.3	0.75	0.938931		1.61757	0.25961	0.940789	0.83874	0.1997	0.93913	1.55766	0.15976	0.898734
35.5	2	0.949045	12.5294	0.29289	0.982684	5.6	0.8	0.923664		4.53319	0.29955	0.934211	1.35796	0.21967	0.930435	1.7973	0.17973	0.886076
14.65	2.1	0.936306	22.9021	0.32724	0.978355	9.9	0.85	0.916031		1.29805	0.33949	0.927632	2.1967	0.27958	0.921739	2.09685	0.1997	0.873418
27.35	2.45	0.929936	7.86672	0.35316	0.97619	13.25	1.15	0.908397		1.37793	0.35946	0.921053	0.47928	0.29955	0.913043	2.3964	0.21967	0.860759
7.05	2.65	0.923567	11.964	0.36048	0.974026	9.4	1.2	0.900763		9.06638	0.37943	0.907895	7.5886	0.31952	0.904348	1.37793	0.29955	0.835443
4.2	2.85	0.917197	4.64355	0.37724	0.969697	5.15	1.25	0.89313		0.55916	0.41937	0.894737	5.991	0.35946	0.895652	1.55766	0.37943	0.822785
58.2	3.2	0.910828	12.8255	0.39204	0.967532	20.3	1.3	0.877863		9.88515	0.43934	0.881579	4.13379	0.37943	0.878261	0.51922	0.3994	0.797468
5.65	3.45	0.898089	5.09247	0.41092	0.965368	9.25	1.35	0.870229		6.55016	0.47928	0.875	1.57763	0.3994	0.852174	4.51322	0.41937	0.78481
61.55	3.5	0.88535	33.891	0.42724	0.963203	2.7	1.45	0.862595		12.8407	0.53919	0.868421	2.49625	0.41937	0.843478	1.31802	0.43934	0.772152
45.65	3.55	0.878981	10.3727	0.52724	0.961039	11.9	1.5	0.854962		1.997	0.55916	0.861842	4.41337	0.45931	0.817391	1.43784	0.51922	0.759494
9.2	3.6	0.872611	7.8052	0.55532	0.958874	5.5	1.55	0.839695		1.47778	0.57913	0.855263	1.23814	0.47928	0.808696	1.07838	0.53919	0.746835
28.7	3.7	0.866242	24.0792	0.57724	0.95671	2.55	1.65	0.832061		5.01247	0.63904	0.835526	0.49925	0.49892	0.8	1.43784	0.55916	0.721519
18.85	3.9	0.859873	7.92162	0.60831	0.954545	7.5	1.75	0.816794		1.85721	0.65901	0.828947	1.03844	0.55916	0.791304	2.15676	0.61907	0.708861
51.2	4.05	0.847134	4.4009	0.61308	0.952381	6.35	1.8	0.80916		3.43484	0.71892	0.822368	1.47778	0.57913	0.782609	1.07838	0.63904	0.683544
6.2	4.1	0.840764	6.00795	0.62724	0.950216	8.1	2	0.801527		3.45481	0.75886	0.809211	1.65751	0.5991	0.773913	0.71892	0.65901	0.658228
2.35	4.15	0.828025	24.1345	0.64879	0.948052	12.2	2.25	0.793893		1.29805	0.77883	0.796053	4.11382	0.61907	0.756522	0.95856	0.67898	0.64557
7.75	4.35	0.821656	10.514	0.72724	0.943723	17.8	2.4	0.778626		2.69595	0.7988	0.789474	1.23814	0.65901	0.73913	4.57313	0.69895	0.632911
4.75	4.45	0.815287	10.4089	0.82724	0.939394	10.9	2.5	0.770992		2.03694	0.83874	0.782895	0.77883	0.69895	0.730435	1.85721	0.71892	0.620253
9.4	4.55	0.802548	17.5058	0.91205	0.937229	3.8	2.55	0.755725		7.80827	0.87868	0.776316	2.75586	0.71892	0.721739	0.69895	0.73889	0.607595
5.8	4.75	0.796178	11.4511	0.92724	0.935065	3.05	2.6	0.717557		8.42734	0.89865	0.763158	2.97553	0.73889	0.713043	2.23664	0.7988	0.594937
8.6	4.85	0.789809	36.972	0.96879	0.9329	5.35	2.8	0.709924		3.21517	0.91862	0.75	7.32899	0.75886	0.704348	1.13829	0.85871	0.582278
14.6	4.95	0.77707	4.29172	1.0174	0.930736	7.7	2.85	0.70229		6.63004	0.93859	0.736842	0.9985	0.85871	0.678261	16.1757	0.91862	0.556962
6.65	5.1	0.770701	18.3833	1.02724	0.928571	4.9	2.95	0.694656		9.32599	0.95856	0.730263	5.85121	0.87868	0.66087	3.91412	0.97853	0.544304
2.1	5.2	0.764331	17.7157	1.02972	0.926407	3.65	3.05	0.671756		1.23814	0.97853	0.710526	1.55766	0.89865	0.643478	4.77283	1.03844	0.518987
12	5.25	0.757962	13.0943	1.07724	0.922078	5.6	3.1	0.664122		2.07688	0.9985	0.671053	2.27658	0.91862	0.634783	2.17673	1.05841	0.506329
27.15	5.3	0.751592	8.0106	1.11094	0.919913	4.9	3.2	0.656489		6.9895	1.01847	0.664474	1.11832	0.97853	0.617391	2.15676	1.09835	0.493671
29.45	5.35	0.738854	7.9534	1.12724	0.917749	5.25	3.25	0.641221		1.13829	1.03844	0.651316	11.9221	0.9985	0.608696	0.67898	1.27808	0.468354
8.95	5.45	0.732484	9.269	1.17724	0.915584	2.3	3.3	0.625954		3.07538	1.05841	0.638158	2.97553	1.01847	0.6	1.49775	1.31802	0.455696
40.55	5.5	0.726115	6.0996	1.19068	0.911255	3.75	3.4	0.618321		0.55916	1.07838	0.631579	0.49925	1.09835	0.582609	4.87268	1.33799	0.443038
20.25	5.6	0.719745	8.07521	1.22724	0.906926	10.3	3.45	0.610687		0.63904	1.09835	0.605263	1.91712	1.13772	0.573913	2.77583	1.37793	0.417722
25.75	5.65	0.707006	6.162	1.2306	0.904762	7.1	3.5	0.603053		1.1982	1.17823	0.598684	2.55616	1.15826	0.565217	2.07688	1.55766	0.405063
9.45	5.7	0.700637	2.72155	1.31536	0.902597	6.45	3.55	0.59542		2.51622	1.23814	0.592105	1.23814	1.17823	0.556522	1.61757	1.57763	0.392405
11.65	5.8	0.694268	7.24035	1.36396	0.900433	10.15	3.65	0.587786		0.77883	1.25811	0.585526	1.93709	1.1982	0.53913	0.53919	1.63754	0.35443
10.7	5.95	0.687898	14.7463	1.37724	0.896104	14.8	3.8	0.580153		2.35646	1.31802	0.572368	2.1967	1.27808	0.521739	0.93859	1.65751	0.341772
3.45	6.05	0.675159	7.5891	1.39284	0.893939	21.7	3.85	0.572519		1.29805	1.33799	0.565789	0.97853	1.29805	0.513043	2.5961	1.71742	0.316456
27.2	6.25	0.66879	30.6032	1.39686	0.891775	8.8	4	0.557252		2.83574	1.35796	0.559211	1.35796	1.31802	0.504348	2.55616	1.7973	0.303797
31.5	6.35	0.66242	12.2783	1.41939	0.88961	5.95	4.05	0.549618		1.997	1.37793	0.552632	1.81727	1.34533	0.495652	1.15826	1.87718	0.278481
3.8	6.4	0.656051	14.6229	1.42724	0.887446	5.55	4.1	0.541985		1.3979	1.41787	0.546053	5.87118	1.35796	0.478261	1.15826	1.95706	0.265823
6.85	6.45	0.649682	47.242	1.46886	0.885281	8.7	4.15	0.534351		0.55916	1.47778	0.539474	6.03094	1.37793	0.469565	0.63904	2.03694	0.253165
22.4	6.5	0.643312	16.0725	1.47724	0.883117	3.15	4.2	0.526718		3.37493	1.49775	0.526316	0.7988	1.39324	0.46087	0.89865	2.07688	0.240506
8.35	6.55	0.630573	16.3293	1.47988	0.880952	4.7	4.25	0.519084		0.93859	1.55766	0.513158	0.73889	1.3979	0.452174	2.47628	2.11682	0.227848
21.45	6.85	0.617834	8.4214	1.52724	0.876623	3	4.35	0.51145		0.65901	1.57763	0.506579	1.85721	1.43784	0.443478	1.25811	2.17673	0.202532
14.2	7.05	0.611465	20.332	1.5771	0.874459	18.55	4.5	0.503817		0.73889	1.5976	0.5	0.55916	1.47778	0.434783	1.23814	2.25661	0.189873
14.85	7.1	0.605096	24.7572	1.57724	0.87013	15.5	4.8	0.496183		1.91712	1.61757	0.493421	1.27808	1.53769	0.426087	1.89715	2.29655	0.177215
10.7	7.3	0.598726	10.3454	1.67164	0.867965	7.55	5.15	0.48855		2.1967	1.67748	0.486842	1.97703	1.55294	0.417391	2.15676	2.3964	0.164557
8.45	7.35	0.592357	7.8338	1.67724	0.863636	6.55	5.2	0.473282		2.1967	1.69745	0.473684	0.57913	1.55766	0.4	0.81877	3.03544	0.151899
9.85	7.45	0.585987	6.279	1.71052	0.861472	3.5	5.25	0.458015		3.93409	1.73739	0.467105	0.51922	1.56891	0.391304	2.69595	3.09535	0.139241
9.15	7.5	0.573248	13.0446	1.72724	0.859307	4.9	5.4	0.450382		1.89715	1.77733	0.460526	1.73739	1.5976	0.382609	1.57763	3.3949	0.126582
8.15	7.6	0.56051	4.5188	1.73481	0.857143	13.75	5.45	0.442748		4.25361	1.7973	0.453947	0.67898	1.67748	0.373913	1.21817	3.994	0.113924
19.15	7.7	0.55414	7.03495	1.77724	0.854978	11.85	5.75	0.435115		2.81577	1.89715	0.440789	1.13829	1.81727	0.356522	0.5991	4.05391	0.101266
6.15	7.75	0.547771	10.6295	1.80968	0.852814	4.1	5.8	0.427481		0.67898	1.93709	0.434211	1.09835	1.82443	0.347826	1.17823	4.25361	0.0886076
7.75	8.15	0.541401	8.67815	1.81294	0.850649	8.25	5.95	0.412214		3.07538	1.97703	0.427632	0.9985	1.89715	0.33913	6.53019	4.35346	0.0759494
14.2	8.25	0.535032	8.26735	1.82724	0.844156	5.8	6	0.40458		3.71442	2.01697	0.421053	9.40587	2.03694	0.330435	1.1982	4.87268	0.0632911
6.45	8.45	0.528662	7.3944	1.82984	0.841991	7.5	6.05	0.396947		3.35496	2.05691	0.407895	1.25811	2.09685	0.321739	2.3964	5.15226	0.0506329
34.75	8.6	0.503185	7.85655	1.88119	0.837662	12.1	6.3	0.389313		0.47928	2.13679	0.401316	1.94834	2.11682	0.313043	0.73889	6.01097	0.0379747
11.6	8.85	0.496815	4.46745	1.97044	0.835498	15.8	6.35	0.381679		1.29805	2.15676	0.394737	2.20386	2.17673	0.304348	2.81577	7.54866	0.0253165
9.7	8.95	0.490446	4.5188	1.97724	0.833333	8.65	6.4	0.374046		1.31802	2.21667	0.388158	1.77267	2.37643	0.295652	8.32749	7.80827	0.0126582
8.55	9	0.484076	13.5148	2.02503	0.831169	20.65	6.5	0.366412		1.67748	2.29655	0.375	1.51715	2.38338	0.286957	1.05841	15.6565	0
9.7	9.15	0.477707	7.34305	2.02724	0.829004	13.45	6.95	0.358779		2.27658	2.37643	0.368421	2.76281	2.41637	0.278261	2.63604
26.05	9.25	0.471338	9.39705	2.0282	0.82684	8.35	7.05	0.351145		1.29805	2.3964	0.361842	0.87835	2.52711	0.269565	2.23664
11.25	9.3	0.458599	19.8725	2.05023	0.824675	5.4	7.1	0.343511		0.93859	2.41637	0.355263	1.72476	2.53619	0.26087	0.67898
4.55	9.45	0.452229	9.1403	2.05644	0.822511	5.35	7.6	0.335878		6.41037	2.43634	0.348684	0.85871	2.57613	0.252174	2.31652
6.95	9.5	0.43949	36.0408	2.05708	0.820346	9.35	7.85	0.320611		2.09685	2.51622	0.342105	1.75736	2.5961	0.234783	1.83724
12.65	9.55	0.433121	11.7322	2.07724	0.813853	8.05	7.9	0.312977		1.65751	2.53619	0.335526	1.37793	2.95556	0.226087	0.55916
22.9	9.9	0.420382	11.9645	2.08659	0.811688	6.8	7.95	0.305344		1.05841	2.69595	0.328947	6.7898	3.1952	0.217391	0.91862
14.35	10	0.414013	7.2917	2.11484	0.809524	14.05	8	0.29771		0.93859	2.77583	0.315789	1.25811	3.61457	0.208696	0.81877
11.55	10.15	0.407643	12.6321	2.12724	0.807359	11.2	8.6	0.290076		2.35646	2.91562	0.309211	0.5991	3.71442	0.2	1.89715
13.45	10.3	0.401274	8.16465	2.17724	0.805195	6.4	8.65	0.282443		5.69145	2.93559	0.302632	0.69895	3.73439	0.191304	1.17823
11.4	10.35	0.394904	8.2214	2.21896	0.80303	10.25	8.9	0.274809		4.73289	3.05541	0.296053	4.89265	3.75436	0.182609	5.67148
42	10.55	0.388535	6.00795	2.23036	0.800866	12.9	9.25	0.267176		1.71742	3.07538	0.289474	0.65901	4.03394	0.173913	3.55466
10.95	11.3	0.375796	12.0159	2.27724	0.798701	8.6	9.3	0.259542		0.5991	3.13529	0.282895	1.03844	4.41337	0.165217	1.7973
15.35	11.35	0.369427	4.15935	2.29199	0.796537	3.6	9.55	0.251908		0.67898	3.15526	0.276316	1.27808	4.51322	0.156522	2.69595
11.1	11.5	0.363057	6.9836	2.32724	0.792208	16.55	9.6	0.244275		6.94956	3.1952	0.269737	0.37943	4.77283	0.147826	0.63904
18.4	11.85	0.356688	4.57015	2.32814	0.790043	5.7	9.8	0.236641		0.71892	3.41487	0.256579	1.67748	4.83274	0.13913
17.9	12.1	0.343949	10.9328	2.3466	0.787879	2.3	9.9	0.229008		1.25811	3.63454	0.25	4.09385	5.17223	0.130435
28	12.25	0.33758	11.1618	2.36964	0.785714	7.75	10.05	0.221374		2.31652	3.85421	0.236842	0.83874	5.47178	0.121739
33.95	12.45	0.33121	8.75772	2.38796	0.78355	6.1	10.6	0.21374		0.29955	3.87418	0.230263	0.77883	5.49175	0.113043
29.85	12.5	0.324841	10.5322	2.39469	0.781385	19.3	10.65	0.206107		0.85871	3.91412	0.223684	5.55166	5.61157	0.104348
9.55	12.55	0.318471	9.67356	2.42724	0.777056	4.85	10.95	0.198473		2.45631	3.95406	0.217105	1.69745	5.65151	0.0956522
22.15	12.75	0.312102	13.2483	2.44604	0.772727	43.55	11.15	0.19084		10.5841	4.03394	0.210526	0.83874	6.01097	0.0869565
22.3	13.25	0.305732	10.0646	2.47724	0.768398	5.35	11.45	0.183206		1.7973	4.07388	0.203947	1.29805	6.27058	0.0782609
4.95	13.8	0.299363	11.9132	2.49739	0.766234	5.55	11.75	0.175573		1.07838	4.1937	0.197368	2.47628	6.41037	0.0695652
7.7	14.8	0.292994	12.9402	2.52336	0.764069	3.95	12.2	0.167939		1.1982	4.23364	0.190789	0.75886	6.94956	0.0608696
11.4	15.8	0.286624	10.6808	2.54804	0.761905	39.8	12.5	0.160305		4.21367	4.43334	0.184211	6.65001	6.9895	0.0521739
15.9	16.3	0.280255	22.5426	2.56842	0.75974	16.75	13.05	0.152672		14.1587	4.71292	0.177632	7.36893	7.20917	0.0434783
48.85	16.75	0.273885	12.6321	2.57079	0.757576	4.05	13.2	0.145038		1.35796	4.75286	0.171053	6.3904	7.94806	0.0347826
13.4	17.05	0.267516	11.3483	2.57724	0.755411	4.55	13.5	0.137405		1.33799	4.7928	0.164474	1.93709	9.02644	0.026087
38.55	17.85	0.261146	10.5469	2.62724	0.753247	8.3	14.25	0.129771		2.43634	5.11232	0.157895	3.57463	11.5427	0.0173913
8.15	18.15	0.254777	28.0326	2.67724	0.751082	2.7	14.45	0.114504		2.9955	5.3919	0.151316	1.57763	16.3155	0.00869565
41.5	19.05	0.248408	3.8857	2.70279	0.748918	14.5	15.5	0.10687		1.85721	5.97103	0.144737	0.95856	27.3589	0
7.6	19.35	0.242038	19.1022	2.72132	0.746753	10.2	16.25	0.0992366		0.87868	6.11082	0.138158	1.47778
5.6	20.05	0.235669	32.7613	2.77724	0.742424	6.3	17	0.0916031		1.33799	6.25061	0.131579	27.7383
14.55	20.2	0.229299	22.0805	2.79372	0.74026	6.15	18	0.0839695		1.53769	6.33049	0.125	0.75886
8.65	20.3	0.22293	7.2917	2.82724	0.738095	11.55	18.35	0.0763359		1.97703	6.65001	0.111842	16.6949
25.2	20.8	0.216561	12.0404	2.86131	0.735931	25.6	19.05	0.0687023		1.63754	6.68995	0.105263	1.73739
8.65	21.5	0.210191	4.09779	2.86572	0.733766	5.75	19.4	0.0610687		1.09835	6.70992	0.0986842	2.7958
4.2	21.6	0.203822	5.31195	2.87724	0.729437	3.1	19.7	0.0534351		1.27808	7.22914	0.0921053	8.32749
12.4	22.7	0.197452	7.65115	2.88384	0.727273	12.35	21.3	0.0458015		9.00647	7.50872	0.0855263	1.07838
13.6	22.8	0.191083	9.0376	2.8946	0.725108	6.3	23.3	0.0381679		1.3979	7.72839	0.0789474	1.3979
12.45	23.1	0.184713	20.1806	2.9046	0.722944	4.9	25.75	0.0305344		1.3979	8.12779	0.0723684	1.93237
10.7	23.65	0.178344	6.88024	2.95143	0.718615	6.5	29.2	0.0229008		1.07838	8.60707	0.0592105	2.90654
2.85	23.95	0.171975	2.98481	3.01971	0.71645	3.1	37.5	0.0152672		2.71592	8.70692	0.0526316	2.95556
9.6	24.4	0.165605	7.03495	3.02724	0.714286	31.5	40.95	0.00763359		2.67598	8.76683	0.0460526	2.91562
23.6	25.05	0.159236	8.67815	3.039	0.712121	4.8	41.25	0		5.05241	9.02644	0.0394737	1.77733
6.25	25.1	0.152866	12.7861	3.05544	0.709957	3.85				0.49925	9.5856	0.0328947	2.41637
44.8	25.25	0.146497	9.49975	3.07724	0.705628	11.6				0.41937	10.2845	0.0263158	1.53769
13.4	25.9	0.140127	48.617	3.12564	0.703463	7.45				0.53919	11.1233	0.0197368	4.7928
10.55	26.6	0.133758	11.9132	3.22179	0.701299	4.9				0.47928	11.5626	0.0131579	5.21217
6.55	27.35	0.127389	8.98625	3.23919	0.699134	2.8				1.05841	12.5412	0.00657895	5.15226
10.25	27.75	0.121019	37.0747	3.27724	0.69697	15.35				1.3979	13.8592	0
6.65	29.4	0.11465	15.1483	3.31191	0.694805	22				1.61757
7.9	30.3	0.10828	12.6321	3.37724	0.692641	5.85				0.71892
12	31.85	0.101911	26.3939	3.42724	0.690476	3.55				1.77733
3.55	32.65	0.0955414	30.81	3.4722	0.688312	12.95				2.5961
12.1	33.4	0.089172	22.3373	3.47724	0.683983	10.15				0.83874
8.95	33.6	0.0828025	15.7131	3.48662	0.681818	6.65				1.7973
5.3	34.95	0.0764331	27.0101	3.57724	0.679654	8.25				2.23664
5.55	35.2	0.0700637	30.1938	3.64548	0.677489	23.6				1.55766
6	36.45	0.0636943	24.4426	3.67844	0.675325	5.1				2.73589
7.8	38.45	0.0573248	9.80785	3.69492	0.67316	43.25				8.90662
8.05	39.4	0.0509554	14.5834	3.72979	0.670996	4.05				4.15376
9.6	39.55	0.044586	15.6104	3.78504	0.668831	28.05				11.4228
9.8	39.9	0.0382166	13.2483	3.82724	0.666667	16.75				7.00947
7.35	42.7	0.0318471	9.39705	3.88384	0.664502	10.95				4.49325
6.15	43.55	0.0254777	3.1837	3.89769	0.662338	7.55				1.35796
13.95	46.75	0.0191083	3.88244	3.92724	0.658009					7.52869
7.45	49.1	0.0127389	42.8772	3.93519	0.65368					3.71442
5.6	56.1	0.00636943	12.8375	3.96528	0.651515					4.17373
37.3	59.45	0	13.2996	3.97724	0.649351					8.90662
7.45			13.5564	3.98654	0.647186					0.73889
6.25			6.7782	4.02684	0.645022					4.15376
32.4			13.351	4.02724	0.640693					1.87718
7.4			14.9428	4.0498	0.638528					6.94956
10.7			16.1239	4.07724	0.636364					3.23514
7.3			15.405	4.08924	0.634199					0.95856
19.95			15.1483	4.10756	0.632035					3.49475
11.35			12.1186	4.14059	0.62987					6.27058
24.8			29.783	4.14552	0.627706					4.33349
3.8			25.675	4.17724	0.623377					1.29805
5.7			12.9916	4.19058	0.621212					5.41187
16.9			20.1292	4.20624	0.619048					5.09235
7.05			7.44575	4.2807	0.616883					8.02794
11.6			32.6073	4.30972	0.614719					11.8622
37.05			8.88355	4.37724	0.612554					1.27808
21.15			27.7803	4.41588	0.608225					1.27808
41.65			12.2213	4.42724	0.606061					1.17823
4.1			5.7512	4.52724	0.603896
26.5			2.4648	4.57724	0.601732
35.7			6.93225	4.70544	0.599567
11.05			16.0725	4.71404	0.597403
10.35			12.7861	4.72724	0.593074
			22.9021	4.80748	0.590909
			16.8428	4.82724	0.588745
			8.0106	4.85949	0.584416
			3.55264	4.90476	0.582251
			17.2081	4.91084	0.580087
			8.54854	4.96219	0.575758
			12.5808	5.0606	0.571429
			10.6295	5.12724	0.569264
			20.1292	5.16759	0.5671
			10.8862	5.17724	0.564935
			21.1562	5.205	0.562771
			10.424	5.21894	0.556277
			10.2187	5.27029	0.551948
			10.8348	5.27478	0.549784
			10.7322	5.27724	0.547619
			13.4024	5.31708	0.545455
			12.8888	5.32164	0.54329
			16.8428	5.32724	0.541126
			20.5913	5.37299	0.538961
			12.8375	5.42724	0.534632
			9.60245	5.46492	0.532468
			7.95925	5.4938	0.530303
			6.21335	5.51634	0.528139
			53.0959	5.57839	0.525974
			20.4886	5.65503	0.52381
			11.0916	5.73244	0.521645
			19.3076	5.76104	0.519481
			3.95395	5.77724	0.517316
			3.9026	5.78379	0.515152
			3.95395	5.79396	0.512987
			43.3907	5.84886	0.510823
			23.2615	5.87724	0.508658
			14.378	5.88064	0.506494
			6.93225	5.88649	0.504329
			7.34305	5.89064	0.502165
			43.2517	5.92724	0.5
			8.1444	5.93784	0.495671
			20.4227	5.95588	0.493506
			4.4424	6.00245	0.491342
			10.1188	6.07164	0.489177
			14.0185	6.07724	0.487013
			16.3806	6.09189	0.484848
			25.3156	6.12724	0.482684
			12.5808	6.14864	0.480519
			5.9566	6.17724	0.478355
			8.9349	6.19459	0.47619
			4.36475	6.22724	0.474026
			7.2917	6.24594	0.471861
			9.3457	6.27724	0.469697
			35.8423	6.34864	0.467532
			9.08895	6.47578	0.465368
			11.8105	6.57724	0.463203
			10.8348	6.60539	0.45671
			6.0593	6.62724	0.454545
			11.2456	6.67788	0.452381
			16.4834	6.68496	0.450216
			5.80255	6.72724	0.448052
			4.77555	6.80772	0.445887
			21.9264	6.8106	0.443723
			11.5024	6.81079	0.441558
			7.34754	6.86214	0.439394
			10.202	6.91349	0.437229
			8.88048	6.96484	0.435065
			3.54162	7.01619	0.4329
			6.97752	7.06754	0.430736
			16.4834	7.0822	0.428571
			36.6639	7.19624	0.426407
			23.7237	7.27294	0.424242
			8.67815	7.27724	0.419913
			30.1425	7.32429	0.415584
			30.3479	7.37724	0.41342
			7.9634	7.42699	0.411255
			21.1442	7.48652	0.409091
			13.2906	7.52969	0.406926
			5.55	7.6008	0.404762
			2.8	7.62724	0.402597
			4.1	7.73509	0.400433
			3.9	7.99184	0.398268
			4.15	8.02724	0.396104
			4.5	8.04604	0.393939
			6.6	8.093	0.391775
			15.2	8.12922	0.38961
			7.5	8.14589	0.387446
			10.1	8.20852	0.385281
			3.65	8.26851	0.383117
			2.9	8.27264	0.380952
			20.2	8.29994	0.376623
			3.3	8.3361	0.374459
			8.65	8.35129	0.372294
			3.75	8.37724	0.37013
			4.65	8.3818	0.367965
			2.7	8.44124	0.365801
			8.7	8.4594	0.363636
			6.25	8.47414	0.361472
			3.65	8.55669	0.357143
			3.15	8.60804	0.354978
			4.75	8.64172	0.352814
			2.3	8.65939	0.350649
			3.9	8.67405	0.348485
			7.2	8.71911	0.34632
			2.4	8.76209	0.341991
			3	8.78612	0.339827
			5.15	8.81344	0.337662
			4.95	8.82724	0.335498
			5.45	8.86008	0.333333
			9.35	8.98828	0.331169
			3.75	9.01884	0.329004
			8.2	9.08904	0.32684
			8.15	9.1038	0.324675
			3.45	9.17289	0.322511
			9.35	9.27559	0.320346
			24.95	9.27724	0.318182
			8.8	9.30489	0.316017
			5.9	9.37829	0.313853
			13.35	9.42964	0.311688
			3.6	9.59778	0.309524
			6.65	9.6594	0.307359
			3.38812	9.73774	0.305195
			5.55938	9.84044	0.300866
			2.9	9.89121	0.298701
			5.1	9.89179	0.296537
			6.1	9.94314	0.294372
			3.15	9.96766	0.292208
			7.4	9.99449	0.290043
			20.55	10.0458	0.287879
			10.9	10.1485	0.285714
			3.85	10.2055	0.28355
			4.9	10.4566	0.281385
			4.85	10.508	0.277056
			3.2	10.5215	0.274892
			7.5	10.5593	0.268398
			6.8	10.6342	0.266234
			5.65	10.7134	0.261905
			13	10.7527	0.25974
			11.35	10.7647	0.255411
			6	10.8161	0.253247
			23.5	10.8674	0.251082
			4.55	10.9188	0.248918
			2.1	10.9272	0.246753
			5.55	10.9718	0.244589
			6.45	11.0215	0.242424
			4.2	11.1755	0.238095
			3.45	11.2179	0.235931
			6.5	11.2269	0.233766
			2.65	11.2772	0.231602
			2.6	11.2782	0.229437
			4.46072	11.3296	0.227273
			5.1282	11.442	0.225108
			3.7444	11.4836	0.222944
			3.30336	11.5272	0.220779
			4.1292	11.5354	0.218615
			4.41936	11.9458	0.21645
			3.10248	12.1437	0.214286
			4.97736	12.1662	0.212121
			8.88336	12.3052	0.209957
			7.56656	12.5106	0.207792
			4.1876	12.5501	0.205628
			2.48368	12.562	0.203463
			4.0432	12.6735	0.201299
			3.26344	12.8701	0.199134
			2.62808	13.0755	0.194805
			3.4656	13.0899	0.192641
			10.4546	13.1272	0.190476
			5.71824	13.2233	0.188312
			15.3642	13.2914	0.186147
			4.79408	13.3322	0.183983
			4.10096	13.378	0.181818
			4.12984	13.5376	0.179654
			4.6208	13.6403	0.177489
			6.7868	13.8334	0.175325
			26.6851	13.9998	0.170996
			7.53768	14.0511	0.168831
			2.68584	14.2565	0.166667
			3.43672	14.3079	0.164502
			7.13336	14.4106	0.160173
			5.11176	14.77	0.155844
			3.78328	15.1353	0.15368
			5.54496	15.1686	0.151515
			10.7145	15.433	0.149351
			9.15496	15.5232	0.147186
			8.02864	15.643	0.145022
			26.4541	15.6772	0.142857
			4.93848	16.109	0.140693
			3.09016	16.3105	0.138528
			4.30312	16.6722	0.136364
			20.0716	17.0294	0.134199
			5.1984	17.2348	0.132035
			9.55928	17.7997	0.12987
			7.27776	17.9988	0.127706
			10.1658	18.0564	0.123377
			6.12256	18.1078	0.121212
			10.8589	18.1272	0.119048
			11.061	18.2592	0.116883
			17.2414	18.3499	0.114719
			15.4508	18.4159	0.112554
			15.9062	18.4772	0.11039
			2.43324	18.5186	0.108225
			5.97045	19.0714	0.106061
			4.86648	19.0834	0.103896
			6.35346	19.8537	0.0995671
			17.5959	20.0077	0.0974026
			4.12299	20.2645	0.0952381
			5.38467	20.4699	0.0930736
			7.38984	20.8293	0.0887446
			14.2164	21.1888	0.0865801
			6.21828	21.4272	0.0844156
			10.3413	21.6509	0.0822511
			5.02419	22.0065	0.0800866
			10.7919	22.0617	0.0779221
			3.49215	22.3698	0.0757576
			2.36565	22.6844	0.0735931
			2.32059	22.8772	0.0714286
			6.48864	23.2428	0.0692641
			2.68107	23.6022	0.0670996
			18.745	24.3211	0.0649351
			3.80757	24.3813	0.0627706
			18.1817	24.6124	0.0606061
			12.5943	24.9373	0.0584416
			3.46962	25.4788	0.0562771
			32.5333	25.7076	0.0541126
			34.8088	25.9598	0.0519481
			6.03804	27.7102	0.0497835
			4.64118	28.0697	0.047619
			10.7468	28.121	0.0454545
			7.72779	28.2751	0.04329
			4.93407	28.5304	0.0411255
			34.178	28.7372	0.038961
			5.29455	30.4606	0.0367965
			5.76768	30.5345	0.034632
			3.64986	30.6885	0.0324675
			4.9566	31.8182	0.030303
			11.6705	32.1052	0.0281385
			5.8578	32.7361	0.025974
			6.26334	33.7695	0.0238095
			12.7069	33.9681	0.021645
			15.1627	34.5911	0.0194805
			5.02419	34.8992	0.017316
			3.04155	35.0019	0.0151515
			14.239	40.8045	0.012987
			11.3776	41.1789	0.0108225
			2.07276	41.318	0.00865801
			13.6081	45.1692	0.00649351
			6.48864	46.5442	0.004329
			4.59612	51.0231	0.0021645
			2.20794	68.2254	0
			4.15
			7.35
			5.35
			10.45
			27.5515
			11.1766
			7.13336
			6.38248
			8.75064
			3.26344
			10.2813
			6.18032
			2.42592
			4.96736
			4.15
			3.3
			4.35
			3.25
			2.25
			8.3
			2.45
			6.1
			2.8
			5.15
			7.95
			6.15
			4.95
			4.5
			4.05
			6.05
			4.4
			9.45
			2.25
			8.25
			6
			2.5
			4.4
			7.25
			6.25
			3.1
			6.9
			4.7
			8
			3.5
			8.35
			5.5
			4.55
			3.8
			6.8
			3.9
			3.6
			3.55
			7.85
			13.6
			17.75
			9.7
			2.45
			4.25
			4.85
			2.4
[truncated: 65 more columns]

## Sheet: Panel C
	SWR1	Swc2
Upper Limit With Rotation (Max)	0.183	6.86
Upper Limit With Rotation (Min)	0.105	4.01
Upper Limit Without Rotation	36.7	125
	dCas9	SWR1 + ATP			SWR1 no ATP	SWR1 ADP	SWR1 ATPgS	Swc2
	70mM KCl	200mM KCl	70mM KCl	25mM KCl	70mM KCl	70mM KCl	70mM KCl	150mM KCl	70mM KCl	25mM KCl
Median	0.000268072	0.0409501	0.0239473	0.0149698	0.0126124	0.0110585	0.0263474	1.54869	1.03803	0.719254
SEM	0.000366547	0.00304348	0.00138659	0.00116469	0.00167932	0.00186519	0.00193693	0.125014	0.0882993	0.0687303
	dCas9	SWR1 + ATP			SWR1 no ATP	SWR1 ADP	SWR1 ATPgS	Swc2
	70mM KCl	200mM KCl	70mM KCl	25mM KCl	70mM KCl	70mM KCl	70mM KCl	150mM KCl	70mM KCl	25mM KCl
	0.00033568	0.0147429	0.0345284	0.019629	0.0480674	0.00275571	0.0194418	1.37141	1.41496	0.661359
	9.89896e-05	0.0427683	0.0267547	0.00749483	0.00293431	0.0127857	0.0239108	1.58082	2.28229	2.00898
	0.000870381	0.00512281	0.00676252	0.0099531	0.0322449	0.0338038	0.031585	0.680358	1.81194	0.47638
	0.00372736	0.0354008	0.0154112	0.0284718	0.00750164	0.00859422	0.0366658	1.40628	0.281483	0.109418
	0.000149473	0.0113813	0.00987405	0.00905898	0.0260741	0.116149	0.0273079	4.14162	2.17405	0.401671
	0.000277188	0.0375868	0.0239336	0.0138005	0.0475253	0.0133794	0.0414681	2.05822	0.285672	0.197645
	0.000189448	0.0803602	0.0469807	0.00350165	0.0243233	0.00284689	0.0267347	1.17579	1.86035	0.116815
	0	0.0568227	0.0472759	0.00740293	0.0523349	0.0147667	0.0281589	2.32669	2.10515	1.6423
	0.000457193	0.0136725	0.00457536	0.027316	0.0796309	0.00752349	0.0925851	2.19048	0.564555	0.689938
	0.000401656	0.108669	0.0333326	0.00308714	0.1305	0.0156909	0.0578886	2.76928	0.617246	0.912403
	0	0.0431566	0.00825832	0.00504772	0.0030893	0.0198478	0.0296608	1.36662	0.532115	0.700735
	0.000178082	0.0235779	0.0263592	0.0195264	0.0600046	0.0113015	0.060601	1.42628	1.55836	1.9855
	0.0022772	0.0142063	0.0198205	0.0291531	0.101504	0.0082826	0.0701572	1.09405	0.345212	0.389686
	2.23968e-05	0.00264736	0.0142149	0.0243094	0.0159699	0.0115018	0.030364	0.563415	0.93254	0.845508
	2.6743e-05	0.114932	0.00659953	0.00101573	0.0148077	0.00657672	0.02198	1.07536	0.422556	0.341707
	0.000120689	0.0260839	0.0223933	0.0346386	0.0150889	0.00536923	0.0710367	1.52389	1.5553	0.259871
	0.000396521	0.0266319	0.0394743	0.0272647	0.00791935	0.00137138	0.0177694	3.68699	0.789397	0.710957
	0.000258957	0.0293263	0.0173205	0.0116643	0.00277393	0.0284884	0.0255304	1.42504	0.541562	0.311062
	0.000372687	0.0532085	0.0210706	0.0138512	0.0790849	0.00595557	0.0480364	1.65824	0.115416	0.449041
	0.00357804	0.0340425	0.00828688	0.0154711	0.0489457	0.00151959	0.00476549	0.76008	0.348647	0.950621
	7.29197e-05	0.049166	0.0287792	0.0705963	0.0270382	0.00170277	0.0185193	1.59437	1.7212	0.0783955
	0	0.0400752	0.0201933	0.0369229	0.0210992	0.00205191	0.0195862	1.54869	0.672308	0.346584
	0.000156483	0.0339287	0.0154287	0.0192917	0.0518832	0.00961682	0.0419594	0.852332	0.209014	1.13905
	0.000346347	0.0934299	0.0368383	0.015474	0.0512973	0.00389054	0.0126795	0.580376	1.58871	0.127043
	0.000240031	0.0927004	0.00429767	0.0103977	0.021408	0.0129923	0.13529	3.29321	0.495669	0.863369
	1.38929e-05	0.0683074	0.0268331	0.0543748	0.0198649	0.0148967	0.024806	1.08201	1.73953	0.277843
	0.000242317	0.0722208	0.0154518	0.018864	0.0219777	0.00773991	0.0228349	1.24983	1.11939	0.467676
	0.00900825	0.0369191	0.0654612	0.0264138	0.0228869	0.00899471	0.0432833	1.55639	1.43635	0.501589
	0.0063658	0.0103568	0.0207717	0.0268256	0.010197	0.0672707	0.0382263	0.999848	1.80241	0.34823
	8.42756e-05	0.037279	0.00704099	0.0702361	0.0611069	0.00188224	0.0164622	0.96971	3.84066	0.163603
	0.000416438	0.043258	0.00730693	0.0272723	0.0527285	0.0195818	0.0213995	1.4461	1.30723	0.32758
	9.63411e-05	0.0232556	0.0492297	0.0211225	0.0372031	0.0123311	0.0263474	0.754961	0.50586	0.196621
	0.00105852	0.075705	0.097716	0.00344599	0.0449031	0.00892921	0.0799779	2.84643	1.48024	0.1502
	0	0.0246266	0.0470439	0.018087	0.00909072	0.0127182	0.0188875	1.82766	0.97324	1.09314
	0.00514401	0.117337	0.03432	0.00687611	0.0286619	0.00509689	0.0556902	0.980117	0.844644	2.40234
	0.00286692	0.0530827	0.0742498	0.00568509	0.0040557	0.00432683	0.0256063	1.71846	2.78661	2.09863
	0	0.0569094	0.00748904	0.0114313	0.00865328	0.00117771	0.0678625	1.11158	1.83183	0.920507
	0.000819867	0.0180684	0.012034	0.00458427	0.0103897	0.00280212	0.0206759	2.62374	0.935517	0.975659
	0	0.0253816	0.0234075	0.0240834	0.0209946	0.012152	0.0757431	4.62164	1.43733	1.24288
	0.000427858	0.0872981	0.0271288	0.0197985	0.0220918	0.0349193	0.0364505	2.96984	1.48822	1.07138
	0	0.0441897	0.0520664	0.0100387	0.00819591	0.00433175	0.0106998	2.35612	3.12335	0.323954
	0.00145486	0.0111823	0.00996083	0.00873619	0.00459238	0.0147938	0.00312519	0.775348	0.961385	0.379572
	0.00422312	0.0366568	0.0205134	0.00595999	0.0217097	0.00124787	0.0315093	2.23361	0.787075	0.894211
	0.000530388	0.0139699	0.015584	0.00418936	0.00464566	0.0174091	0.0371748	1.46215	1.01799	1.28761
		0.0378149	0.00403984	0.0159448	0.0570535	0.00041439	0.0232682	1.94375	1.03147	1.19939
		0.0749944	0.0146724	0.0212167	0.00437158	0.0288598	0.0562253	0.611953	0.334123	0.592167
		0.0401919	0.015327	0.0145487	0.016128	0.00676417	0.0128688	1.71769	0.530353	1.32741
		0.127612	0.0115314	0.00722634	0.00559652	0.00817918	0.0302978	1.92321	0.602251	1.51404
		0.051218	0.0456552	0.0134434	0.0322515	0.0334296	0.019819	2.29276	1.71893	1.14807
		0.0400103	0.00601491	0.021192	0.00353417	0.00214022	0.0768625	1.6008	1.93445	0.437142
		0.0369918	0.00910108	0.0376546	0.00514047	0.0163183	0.00350819	2.76024	2.57633	0.908707
		0.0534516	0.0146645	0.0119553	0.0205663	0.0103761	0.0154846	0.764694	2.69544	0.469787
		0.0532653	0.00881195	0.0257846	0.00917726	0.0055505	0.0197933	1.42416	2.2508	0.676106
		0.0848491	0.0460301	0.0389966	0.0096981	0.0447624	0.0153023	1.73969	1.02214	0.770951
		0.02428	0.0877658	0.0243443	0.0144079	0.0177439	0.0534856	3.45404	0.688189	0.218012
		0.0627221	0.0125193	0.0231034	0.0163202	0.024516	0.0222863	1.36825	1.68255	0.404155
		0.10179	0.00996139	0.0149385	0.0110584	0.010276	0.0102559	0.778599	0.874997	1.36864
		0.0324485	0.00913334	0.0148332	0.0023605	0.0218042	0.027674	0.504237	1.40979	1.00282
		0.03132	0.0324929	0.00244871	0.0406576	0.0144571	0.0533096	1.01639	0.992868	0.251959
		0.0414002	0.00523201	0.0233571	0.0507424	0.00878658	0.00644689	2.32834	0.833378	0.236853
		0.0609778	0.0132206	0.00822367	0.0348252	0.00983726	0.0367197	2.363	1.01429	1.12424
		0.0409501	0.0238826	0.016229	0.0522751	0.0198817	0.0231795	0.22017	1.08797	0.868322
		0.0368666	0.0248708	0.0175078	0.00468247	0.0158182	0.0892004	2.4355	1.04693	0.935779
		0.0671911	0.00666823	0.0121837	0.00474449	0.0221485	0.0181668	1.60192	0.966238	0.297638
		0.0267205	0.0498515	0.0137833	0.0284197	0.0143397	0.024068	2.36109	1.46149	0.527718
		0.0461687	0.0167439	0.0102858	0.0176187	0.00864259	0.0124001	1.15052	0.657571	0.364071
		0.0412016	0.0099225	0.0248085	0.026842	0.0167944	0.011306	1.6978	1.12837	0.532068
		0.0140095	0.00185663	0.0154007	0.0100998	0.0901234	0.0590728	1.44486	1.45274	0.561047
		0.0704721	0.0117831	0.0155264	0.00235418	0.0109163	0.0619844	1.48918	1.21965	0.0462765
		0.0140908	0.0234501	0.0146719	0.00460972	0.0149086	0.108942	3.38204	1.9948	0.153699
		0.094058	0.0195331	0.0117839	0.0237695	0.00493299	0.0246476	1.05897	1.14228	0.893007
		0.0884027	0.0385304	0.0105211	0.0161309	0.00334132	0.0179951	3.20615	0.414767	1.12518
		0.0179244	0.00975657	0.019753	0.0298678	0.00861585	0.0685445	0.759765	0.715737	0.273234
		0.00776248	0.0191787	0.00508894	0.00769298	0.0140254	0.0508648	1.03541	2.99069	0.445664
		0.0369849	0.0151857	0.025673	0.00920159	0.0265362	0.0221112	1.88131	0.600737	0.333371
		0.0635155	0.045798	0.00551255	0.0333654	0.00184645	0.00266787	1.86305	1.87578	0.242875
		0.0585661	0.00941797	0.0149626	0.0123088	0.00296312	0.00825774	2.60826	0.979992	2.34429
		0.0484848	0.010448	0.0079876	0.0176534	0.0114058	0.0136387	2.52223	0.863553	3.03105
		0.0472047	0.0198596	0.0413584	0.023005	0.00239745	0.0259201	1.1081	2.71897	0.937453
		0.0272349	0.04178	0.00768841	0.00431738	0.0028946	0.00399932		1.02098	1.60713
		0.10462	0.00533712	0.00816207	0.00445172	0.00328841	0.0216595		2.20789	0.989265
		0.0288973	0.0220683	0.000901696	0.0206844	0.0413242	0.0313659		1.76989	1.24617
		0.0777338	0.00524444	0.0109135	0.00302463	0.00465278	0.0351633		1.07237	2.60343
		0.023228	0.00312604	0.00844127	0.00980614	0.00497729	0.035333		1.64287	1.57216
		0.0288241	0.00821293	0.0146645	0.00270573	0.0158941	0.0389706		0.402906	0.926476
		0.0494586	0.00751575	0.0171874	0.00177522	0.0106482	0.0240763		0.488289	0.620813
		0.0291108	0.0138909	0.0143861	0.0321222	0.00702566	0.0184356		0.758355	1.17581
		0.0301652	0.0430575	0.0493755	0.00798704	0.0128904	0.011993		1.01798	0.911608
		0.0414113	0.0492383	0.0118071	0.00210784	0.00426403	0.0247367		0.669667	1.43904
		0.0283026	0.03219	0.00807786	0.0169494	0.0214793	0.0519203		2.52672	0.444197
		0.049926	0.0169203	0.00911675	0.00943084	0.0116484	0.0560785		1.1014	0.713148
		0.0429527	0.0389009	0.0261101	0.00292913	0.0261136	0.0234061		1.52551	4.31334
		0.127966	0.0499629	0.0174073	0.00436979	0.0191183	0.0104603		1.17047	0.7329
		0.0219023	0.0230297	0.0205143	0.00431771	0.0269387	0.027176		0.31564	0.27251
		0.0635827	0.0315755	0.0257723	0.0436144	0.0111819	0.0134818		1.0926	0.421326
		0.0444925	0.0389625	0.00147962	0.0241459	0.00528214	0.0405225		0.695383	0.450636
		0.0263109	0.0210448	0.0382177	0.0202591	0.00274947	0.00172494		0.906998	0.998362
		0.0678887	0.0226634	0.0288939	0.0129259	0.0012275	0.0483949		1.22949	1.01125
		0.0469955	0.033593	0.0147006	0.0179809	0.00331224	0.0469944		0.525618	1.16868
		0.0554001	0.0294811	0.00558953	0.0121943	0.000624193	0.0212708		1.17902	1.04061
		0.0165131	0.0357482	0.00456737	0.0277041	0.00261128	0.0161954		1.33836	2.52588
		0.0499694	0.0136627	0.0188235	0.0078175	0.0035525	0.0219447		0.0718213	1.21457
		0.0393834	0.00477362	0.00625014	0.044471	0.0197088	0.0203842		1.26523	0.837303
		0.0417941	0.0394086	0.0176569	0.00276522	0.00946056	0.0172861		2.39298	1.03482
		0.0148882	0.0146033	0.0051028	0.0119834	0.00893506	0.0135277		1.00502	1.09661
		0.0788104	0.0235655	0.0176481	0.0171564	0.010757	0.0148347		1.2189	0.972201
		0.00361363	0.00929589	0.0136132	0.0035801	0.0134593	0.0317482		3.9503	0.381358
		0.0421701	0.0752675	0.00878455	0.0111029	0.00225599	0.0322516		1.80216	1.04013
		0.0223803	0.00612934	0.0179504	0.00685357	0.00132481	0.0530337		0.475547	1.14449
		0.0179818	0.0382495	0.0192122	0.00638479	0.0131619	0.0121609		0.51474	1.13253
		0.0299571	0.0341555	0.0380083	0.045277	0.00901069	0.0123386		0.566844	2.4512
		0.067929	0.0373395	0.00187331	0.0246682	0.0104573	0.0288694		0.415405	3.77889
		0.079408	0.00861721	0.0317652	0.0260751	0.00150021	0.0267705		0.894327	2.25687
		0.028789	0.0165503	0.0117654	0.0155773	0.00435928	0.0173771		1.03803	0.973335
		0.0801747	0.00801926	0.00345698	0.027903	0.0069449	0.0800109		0.8836	0.116746
		0.0762612	0.0466884	0.012051	0.0151221	0.0234681	0.045334			1.20554
		0.0249147	0.0316981	0.00738707	0.0953952	0.0144643	0.0332321			0.538074
		0.0463118	0.0345777	0.0223076	0.0293293	0.0470885	0.0229719			0.476391
		0.0723593	0.0478179	0.0128186	0.00412462	0.0401934	0.0254645			0.99243
		0.0447476	0.00350416	0.0127939	0.00791697	0.00327919	0.0071205			0.72536
		0.0646204	0.0267139	0.0246128	0.0199735	0.00285956	0.0227605			0.523541
		0.0326828	0.0183384	0.0215726	0.00633392	0.019283	0.0222771			0.461107
		0.0224974	0.00451598	0.030323	0.000971557	0.0267354	0.029978			1.35112
		0.03487	0.0187473	0.00831266	0.00840717	0.0355862	0.00627907			1.23633
		0.109098	0.0148896	0.0153969	0.0232812	0.0190402	0.0697693			0.68001
		0.0407318	0.0132702	0.0294747	0.00136827	0.00321326	0.0101874			1.40839
		0.0718613	0.0530491	0.0114672	0.0662499	0.0190087	0.0169753			0.0629973
		0.034489	0.0452317	0.0163988	0.0166329	0.00440241	0.00752644			0.794161
		0.00452032	0.0110163	0.0137912	0.011391	0.00721661	0.00723083			0.813285
		0.00908759	0.0139307	0.0039496	0.0104204	0.00200502	0.000887418			0.219261
		0.0184798	0.0272866	0.0138675	0.0210235	0.00307958	0.0170699			0.229648
			0.130366	0.00645178	0.0707122	0.00680678	0.0805143			0.642837
			0.0086016	0.00910138	0.00696611	0.00671842	0.00169185			0.833191
			0.00862363	0.0149698	0.0288484	0.00464713	0.0539601			0.32238
			0.0211435	0.00570049	0.0227028	0.0169551	0.0918714			0.371778
			0.00767272	0.036182	0.0545155	0.00332386	0.0744615			0.922911
			0.034292	0.0321281	0.0460338	0.00150919	0.0563293			0.103326
			0.0287896	0.0228187	0.00296481	0.00216712	0.0372361			0.408421
			0.0273879	0.0155974	0.0099939	0.0482829	0.0757653			0.555815
			0.0158444	0.0282321	0.00636668	0.00816649	0.0468653			0.636273
			0.0166282	0.0153767	0.0277054	0.0110585	0.0379719			0.468308
			0.0207213	0.0213957	0.00118413	0.104368	0.114048			0.436747
			0.0122548	0.0146344	0.0149668	0.0238136	0.0408206			0.915963
			0.0351202	0.00362456	0.0117204	0.00388868	0.0213157			0.787963
			0.0319389	0.0263272	0.0966557	0.0268195	0.0413567			0.568402
			0.00586869	0.0193163	0.012165	0.0125166	0.0215645			0.332
			0.0242339	0.024442	0.0541891	0.00405513	0.0459536			0.734666
			0.0237092	0.0185501	0.0426531	0.0161369	0.0121216			0.598674
			0.0701014	0.0269828	0.0957975	0.00615147	0.0248037			0.427653
			0.0235075	0.0252394	0.0147375	0.0501286	0.0220464			1.10044
			0.0269316	0.0112911	0.00698797	0.00862118	0.0197262			0.824675
			0.0357804	0.00219089	0.0119651	0.00694748	0.00883133			0.470858
			0.0183358	0.0196415	0.00827899	0.00772494	0.0196223
			0.0389722	0.0223183	0.00921292	0.00230026	0.0297295
			0.0241146	0.0097704	0.0151899	0.00924777	0.0561204
			0.0522577	0.0112959	0.00195855	0.0378678	0.0319377
			0.0036097	0.0238563	0.000316419	0.0738007	0.0550439
			0.0199065		0.00192052	0.0176621	0.0555764
			0.0350734		0.0065035	0.0558585	0.037582
			0.0270166		0.00308556	0.0153259	0.0898962
			0.0145973		0.0042753	0.0097345	0.011126
			0.0212919		0.00837096	0.0243612	0.0530669
			0.0374962		0.00924822	0.0370861	0.0933293
			0.0293709		0.00763089	0.0190898	0.003829
			0.0237819		0.00378407	0.0426558	0.092895
			0.0228631		0.00928285	0.0226957	0.0129777
			0.0376373		0.0219739	0.0435311	0.014572
			0.012045		0.00416832	0.0066475	0.033026
			0.00219963		0.020592	0.00868027	0.0027054
			0.0187524		0.00618006	0.00621659	0.0102475
			0.0432481		0.0172598	0.00926383	0.00827226
			0.0280316		0.0146121	0.0266338	0.0122447
			0.0281963		0.0243437	0.0101145	0.00885099
			0.0169898		0.0126124	0.0058229	0.0537333
			0.0498718		0.0276058	0.00529808	0.046548
			0.0306522		0.0174388	0.00304964	0.00638344
			0.0324912		0.0243634	0.00975899	0.0132104
			0.0368362		0.0226379	0.0073283	0.0242487
			0.0143825		0.00604907	0.0059404	0.108716
			0.0168846		0.00713465	0.00908466	0.0116962
			0.023443		0.00169633	0.00852283	0.0533212
			0.0109037		0.00143575	0.00628696	0.0813774
			0.0103866		0.00703645	0.00543182	0.030873
			0.0116124		0.0029399	0.0164106	0.0298092
			0.0142505		0.000774046	0.011076	0.0201512
			0.012303		0.00451822	0.0341438	0.0180643
			0.0256324		0.0016848	0.0121559	0.00395963
			0.0123941		0.000857607	0.00168451	0.0360373
			0.0402994		0.00111297	0.017551	0.0279218
			0.0236296		0.00402709	0.00342189	0.0108485
			0.0223365		0.00188684	0.00560551	0.0243364
			0.0212333		0.00702243	0.00732746	0.00923958
			0.00508652		0.00199296	0.0137505	0.0534524
			0.00165917		0.00778979	0.015219	0.00236369
			0.023819		0.0041842	0.00276639	0.0695528
			0.0319254		0.00118783	0.00101277	0.0681301
			0.018546		0.0299075	0.0116838	0.0185136
			0.0228052		0.0450481	0.00360799	0.0417351
			0.0303086		0.0453161	0.0260426	0.0318952
			0.0130513		0.0535669	0.00982394	0.00979876
			0.0158965		0.0167347	0.000896167	0.0163116
			0.00337747		0.0125247	0.0134395	0.041833
			0.0229112		0.0158361	0.0165091	0.0243348
			0.0248888		0.00387437	0.00277797	0.0269987
			0.00909643		0.0216099	0.0101362	0.0393492
			0.0286291		0.00187944	0.00534739	0.0654212
			0.0155546		0.0133052	0.0174334	0.0330329
			0.0280453		0.0103933	0.00448808	0.0371611
			0.0289805		0.00568508	0.0045406	0.0167278
			0.0303505		0.0183555	0.0111177	0.0495379
			0.0374675		0.00205131	0.00838222	0.0470682
			0.0229191		0.0193395	0.00948155	0.00415223
			0.032727		0.0192767	0.00240174	0.03418
			0.0109272		0.0196649	0.00421726	0.0329078
			0.0168425		0.0103123	0.0115003	0.10697
			0.0258041		0.0155451	0.00300413	0.0527085
			0.0150155		0.0185637	0.00192642	0.0355951
			0.0361075		0.0610909	0.0120652	0.0101379
			0.0260374		0.0779041	0.00140724	0.0113477
			0.00889959		0.00336555	0.00460466	0.0303355
			0.0930155		0.00340601	0.00231624	0.0361838
			0.0462636		0.0472311	0.00696521	0.0469951
			0.0117204		0.00626071	0.00714845	0.0381824
			0.0265023		0.00408978	0.0258225	0.0180721
			0.0128474		0.00835839	0.00390733	0.0363808
			0.0513814		0.0246995	0.00480752	0.0110795
			0.0047301		0.000698371	0.00613792	0.00173735
			0.0253355		0.0512836	0.00706535	0.0243329
			0.0399698		0.00181069	0.00052694	0.0748487
			0.0109232		0.0140168	0.00485447	0.066683
			0.0347783		0.0151063	0.00231002	0.0207745
			0.0543182		0.0350402	0.0122022	0.0129826
			0.0219866		0.00517835	0.024867	0.0105009
			0.0900793		0.00474292	0.00822929	0.000125842
			0.0389746		0.00679324	0.00287587	0.00585325
			0.0554279		0.00133897	0.0383878	0.0514679
			0.0279968		0.000701678	0.0124501	0.0149068
			0.0273165		0.0154519	0.00239336	0.0764866
			0.0297428		0.0497534	0.0207607	0.00330767
			0.00906166		0.00184714	0.00642123	0.0175394
			0.0243041		0.00119656	0.004239	0.0426434
			0.0223915		0.00294501	0.00667715	0.0014181
			0.0893533		0.0174982	0.00300122	0.0630618
			0.0560418		0.0160895	0.138834	0.0577881
			0.0779553		0.00252714	0.0616097	0.0682529
			0.0321237			0.0521413	0.0599834
			0.0277921			0.0628585	0.0232169
			0.026988			0.00310168	0.00428725
			0.0683474			0.00331442	0.00987024
			0.0169781			0.0370809	0.0419191
			0.0172246			0.0100288	0.0486433
			0.0213886			0.00753792	0.0184859
			0.0359121			0.0646972	0.0273451
			0.0636676			0.00407332	0.0235123
			0.0282484			0.083077	0.00718029
			0.0442352			0.00813094	0.0235783
			0.0343944			0.0439515	0.0142857
			0.0223852			0.101381	0.0632488
			0.00518841			0.0690504	0.027179
			0.0320225			0.0254873	0.139509
			0.0489416			0.0834934	0.0648441
			0.0589816			0.0380268	0.0205486
			0.0208725			0.00620453	0.00425176
			0.0327866			0.0581257	0.0198138
			0.0325112			0.0110799	0.00934858
			0.0382326			0.114298	0.0103472
			0.028347			0.0194299	0.00871339
			0.0288474			0.0918951	0.0486019
			0.0011822			0.00403824	0.0162166
			0.089703			0.069616	0.0743571
			0.0554273			0.0538176	0.0342502
			0.0166736			0.0193005	0.0416755
			0.0338615			0.0102883	0.0353458
			0.020596			0.0404196	0.0193857
			0.00492575			0.0958487	0.0116142
			0.10033			0.0106698	0.0290033
			0.0254945			0.041424	0.0529019
			0.0204352			0.0505308	0.109669
			0.0285127			0.0350715	0.0661784
			0.0185004			0.0348189	0.0114673
			0.052168			0.0786488	0.0170579
			0.00398914			0.0426817	0.11479
			0.0365692			0.0887363	0.0861219
			0.0244466			0.0247987
			0.0540861			0.00811616
			0.0361425			0.100546
			0.0589402			0.0170653
			0.088347			0.102733
			0.0446991			0.00337517
			0.0223775			0.0392253
			0.00743906			0.0305439
			0.102009			0.0833069
			0.0158217			0.112532
			0.0233424			0.00876094
			0.0263736			0.0523892
			0.10098			0.0429901
			0.0616359			0.0397265
			0.00625748			0.00770143
			0.0347057			0.125846
			0.0216818			0.0256193
			0.0203732			0.0847677
			0.049189			0.0262799
			0.052907			0.0161889
			0.00971505			0.0493276
			0.0296474			0.0751683
			0.0208507			0.0600657
			0.0320496			0.0691688
			0.0263906			0.0131426
			0.00975881			0.094625
			0.0431611			0.109497
			0.0084139			0.0503704
			0.0315653			0.0814706
			0.0368363			0.0326706
			0.0236686
			0.0207031
			0.0625314
			0.0200647
			0.00633039
			0.0420716
			0.0290973
			0.0557952
			0.0239611
			0.0102379
			0.00451743
			0.0475569
			0.102128
			0.0564201
			0.0263906
			0.0373699
			0.0685249
			0.00684637
			0.0591948
			0.0784799
			0.0329934
			0.0218624
			0.0789058
			0.0615684
			0.0726423
			0.0554977
			0.0689532
			0.104813
			0.0936455
			0.0473717
			0.0544426
			0.0204842
			0.0510926
			0.0410931
			0.0910802
			0.0461409
			0.0551537
			0.0132598
			0.0194035
			0.0522424
			0.0382737
			0.0425949
			0.0254664
			0.040616
			0.0504707
			0.0258434
			0.0502715
			0.0431353
			0.0618779
			0.0652085
			0.00602205
			0.0116172
			0.0578216
			0.116266
			0.0100576
			0.0311135
			0.0520737
			0.0141926
			0.0452939
			0.0789914
			0.0141632
			0.0564441
			0.0925487
			0.0249024
			0.00145388
			0.0110521
			0.00849559
			0.0529429
			0.00688176
			0.13279
			0.00421943
			0.00813556
			0.0572464
			0.0410056
			0.0210739
			0.0349451
			0.0612537
			0.00988072
			0.0232609
			0.0926499
			0.0156191
			0.0937079
			0.0261227
			0.0586172
			0.0626324
			0.00980049
			0.0669597
			0.0147309
			0.0165138
			0.0400261
			0.0260052
			0.0255869
			0.0113506
			0.0190757
			0.0267722
			0.0635942
			0.0208529
			0.0769053
			0.0188301
			0.0138824
			0.0304823
			0.129422
			0.0317037
			0.026109
			0.108405
			0.0149665
			0.018715
			0.0698776
			0.062422
			0.0435019
			0.00733634
			0.00810915
			0.0105142
			0.0199457
			0.00269589
			0.0223171
			0.00543031
			0.0204592
			0.00947823
			0.00932195
			0.0202523
			0.013955
			0.00731267
			0.0242981
			0.104151
			0.0116641
			0.0515981
			0.0201667
			0.0472813
			0.0501818
			0.010558
			0.0157525
			0.00659048
			0.0103371
			0.00613808
			0.0111568
			0.0198399
			0.0133372
			0.0220025
			0.0236882
			0.0174088
			0.0279127
			0.00277202
			0.00566216
			0.00237772
			0.0219992
			0.00393804
			0.0218985
			0.0149296
