# Supplementary material for: ATP binding facilitates target search of SWR1 chromatin remodeler by promoting one-dimensional diffusion on DNA
Source: eLife journal article supplement (doi:10.7554/elife.77352), 2022-07-25
Supplement: supp [file Figure 6 - figure supplement 1.xlsx]

## Sheet: Panel B
	5 pN DNA Length	# Unwrapping Events Counted
	13.1105	44
	13.7909	48
	14.4725	18
	13.8798	39
	13.5895	44
	14.0351	34
	14.573	5
	13.3576	53
	13.8431	48
	14.283	20
	13.6676	29

## Sheet: Panel D
	SWR1 diffusion coefficients on nucleosome array
	0.0146695
	0.059892
	0.0902081
	0.0563132
	0.0239359
	0.0903666
	0.0336665
	0.0409366
	0.0068355
	0.00992296
	0.0164759
	0.00914367
	0.00580266
	0.0351637
	0.0153304
	0.0136632
	0.00507268
	0.10594
	0.0682491
	0.00500286
	0.00484458
	0.0173075
	0.00289828
	0.000570757
	0.00735219
	0.00742097
	0.00827006
	0.0133565
	0.00349724
	0.00308261
	0.000556744
	0.00173319
	0.0272761
	0.00901637
	0.00482412
	0.00818451
	0.0131347
	0.00171674
	0.0375246
	0.0364467
	0.00998718
	0.000881797
	0.00293049
	0.00230005
	0.0239304
	0.254013
	0.004099
	0.00255014
	0.0184649
	0.00674173
	0.0126696
	0.0235042
	0.00851866
	0.00209395
	0.000805587
	0.00656682
	0.000689327
	0.000959386
	0.0172314
	0.00664109
	0.00241298
	0.0164701
	0.00929644
	0.0112323
	0.00521496
	0.00705899
	0.0159084
	0.000184365
	0.0261998
	0.00132428
	0.031549
	0.0100995
	0.00800751
	0.0117649
	0.0265492
	0.116937
	0.00254254
	0.00799238
	0.0176398
	0.0187802
	0.0298785
	0.0362695
	0.0126619
	0.000866052
	0.00252694
	0.0025127
	0.0514026
	0.012196
	0.0094
	0.00693625
	0.0169252
	0.00426906
	0.0051462
	0.0011114
	0.00157208
	0.00323804
	0.0132977
	0.0174298
	0.00362028
	0.0139033
	0.013255
