# Supplementary material for: ATP binding facilitates target search of SWR1 chromatin remodeler by promoting one-dimensional diffusion on DNA
Source: eLife journal article supplement (doi:10.7554/elife.77352), 2022-07-25
Supplement: supp [file Figure 6.xlsx]

## Sheet: Panel B
distance	force
13.3155	4.63654
13.3241	4.62131
13.3263	4.56361
13.3322	4.89276
13.347	4.89722
13.3554	4.828
13.365	4.89415
13.3598	4.81129
13.3554	4.92575
13.3505	5.04566
13.3491	4.9941
13.3545	5.10604
13.348	5.00345
13.3435	4.9538
13.3466	5.12893
13.3504	5.03763
13.3509	4.91701
13.3478	5.00577
13.3498	5.00708
13.3576	5.01213
13.3445	5.00842
13.344	4.95718
13.3462	5.16394
13.3504	5.06264
13.3482	4.94973
13.3541	4.91951
13.3591	4.95011
13.3612	4.88496
13.3623	4.98906
13.3692	5.00284
13.3731	4.94162
13.3788	4.91657
13.3843	4.98423
13.3816	4.79597
13.3763	4.97516
13.376	5.05251
13.3704	5.17537
13.364	4.98997
13.3705	5.02516
13.3803	5.13218
13.3781	4.86506
13.3772	4.8774
13.3786	4.98867
13.373	5.0232
13.3797	5.0077
13.4089	5.06054
13.4442	5.05918
13.4755	5.18356
13.5056	5.49559
13.5382	5.67113
13.572	5.81131
13.6036	6.05719
13.6348	6.37526
13.6688	6.56736
13.6993	6.82094
13.7304	6.98496
13.7644	7.39738
13.795	7.69022
13.8258	8.11289
13.858	8.39835
13.8875	8.72799
13.9173	9.11357
13.951	9.35653
13.9835	9.79644
14.0137	10.3609
14.0451	10.8097
14.076	11.308
14.1106	11.5659
14.1431	12.0508
14.1737	12.7449
14.2005	13.3148
14.2132	13.3615
14.2176	14.2077
14.2189	14.8603
14.22	14.9785
14.2105	14.9205
14.2151	15.0255
14.2235	15.0696
14.2262	14.8635
14.2218	14.9352
14.2129	14.9522
14.2194	15.0636
14.2214	15.0736
14.2183	14.8867
14.2193	15.0382
14.2212	15.0523
14.2201	14.976
14.2175	14.9978
14.2162	14.9887
14.221	15.0285
14.2153	15.0176
14.2193	14.9276
14.2144	15.0924
14.2169	14.9021
14.2187	15.1308
14.2173	14.9128
14.2218	15.0271
14.2406	15.0049
14.2515	14.8889
14.2765	14.6607
14.2711	14.7563
14.272	14.6482
14.2669	15.1467
14.271	15.0916
14.2716	14.9448
14.2719	15.0022
14.2755	14.9749
14.2705	14.8555
14.2745	15.0167
14.2746	15.072
14.2757	14.8902
14.27	14.9887
14.2687	15.0464
14.266	15.0824
14.2688	15.015
14.274	14.9851
14.2788	14.9566
14.2902	14.9836
14.2959	14.8873
14.2929	14.7977
14.2905	14.9192
14.2937	15.1197
14.2939	14.9974
14.2938	14.9372
14.2851	15.0174
14.2909	15.013
14.2923	15.1207
14.2932	14.9189
14.2926	14.9146
14.2934	15.0612
14.2908	14.9199
14.2919	15.0284
14.289	15.0042
14.2893	15.0026
14.2893	15.0573
14.2906	14.8993
14.2896	14.993
14.2922	15.0696
14.2908	14.9115
14.2992	15.0184
14.2912	15.0595
14.2979	14.8923
14.2956	14.9604
14.2892	15.0197
14.29	14.9528
14.298	15.0652
14.2895	14.8964
14.3002	14.9231
14.2959	15.1353
14.294	14.8813
14.298	15.082
14.3096	15.0465
14.3138	14.8984
14.3198	14.7319
14.3155	14.873
14.3132	15.0446
14.3087	15.042
14.3207	15.0783
14.3182	15.0272
14.3185	14.8378
14.309	15.0366
14.3257	15.0366
14.3403	15.0217
14.3409	14.7078
14.3357	14.8212
14.3319	14.9784
14.3392	15.1298
14.3479	14.9465
14.3363	15.0041
14.3385	14.899
14.335	15.1265
14.3355	14.9912
14.3341	15.0487
14.3331	15.0251
14.3431	15.0208
14.3385	15.0372
14.3342	14.8803
14.3371	15.052
14.3396	15.0334
14.3379	14.9502
14.3349	14.9848
14.3383	15.0448
14.3343	14.9749
14.3378	14.9821
14.3395	15.0678
14.336	14.947
14.333	14.9707
14.3333	15.0853
14.3377	14.9918
14.339	15.0544
14.3421	14.9054
14.3375	14.9024
14.3413	15.0259
14.3337	14.9191
14.3395	15.1075
14.3432	15.0508
14.3374	14.9389
14.3393	14.8981
14.3457	15.0629
14.3423	14.9316
14.3442	14.9499
14.3377	15.0149
14.3338	15.0505
14.3389	15.0709
14.3382	15.0352
14.3374	14.9252
14.3428	14.9611
14.3392	15.0566
14.3357	14.9581
14.3404	15.0578
14.3473	15.0571
14.346	14.7856
14.3358	14.9279
14.3437	15.0536
14.3424	15.1171
14.3455	14.8606
14.3421	15.0949
14.3452	14.9375
14.3439	15.0324
14.3444	14.8908
14.344	15.0535
14.3378	15.0459
14.3423	15.0099
14.3445	14.989
14.3435	14.9676
14.3419	14.9975
14.3392	14.9782
14.3433	15.0534
14.346	14.9487
14.3457	14.9525
14.3442	14.9387
14.3482	15.0233
14.3501	14.9931
14.3382	14.9114
14.3424	15.0846
14.3381	15.2052
14.3471	14.9477
14.3385	15.0485
14.3402	14.8688
14.3431	15.1083
14.3405	14.9475
14.3387	14.9999
14.3414	15.051
14.3444	15.0783
14.3324	14.9259
14.3368	14.9679
14.3392	15.176
14.3405	14.9486
14.3349	14.9075
14.337	15.0296
14.3403	15.0348
14.3389	14.9912
14.3391	14.9545
14.3352	15.1009
14.3425	14.9252
14.3385	15.1455
14.338	14.8753
14.3423	15.0321
14.3336	14.929
14.3404	14.957
14.337	15.1322
14.3355	14.9508
14.3375	15.0458
14.3364	14.9544
14.3385	14.9081
14.3367	15.0835
14.3404	14.9727
14.3389	15.0241
14.3417	14.9324
14.3355	14.9727
14.3368	15.026
14.3446	15.0396
14.3436	14.9948
14.3435	14.8456
14.3412	15.0977
14.3401	15.039
14.3391	15.0517
14.3412	14.9306
14.3381	15.1016
14.3413	14.9572
14.3387	15.0738
14.3453	14.8548
14.3429	15.075
14.3446	14.904
14.3465	15.0794
14.3419	14.991
14.3414	14.9394
14.3373	15.1583
14.3467	14.8983
14.3386	15.1097
14.3428	14.8607
14.3446	15.0479
14.3442	15.0444
14.3414	14.9338
14.3413	15.0002
14.3427	15.034
14.3401	14.9847
14.3405	14.947
14.3421	14.98
14.3434	14.9879
14.3433	14.9345
14.344	15.0215
14.3385	14.9993
14.3424	15.0479
14.3448	14.9593
14.3373	14.9837
14.3405	14.9583
14.3437	15.0528
14.3443	14.9882
14.3449	14.9209
14.3427	14.991
14.3485	14.9669
14.3463	15.0506
14.3403	14.9771
14.3482	14.9402
14.3418	15.1157
14.3431	14.9401
14.3434	15.0628
14.3455	14.9503
14.3437	15.0225
14.3409	14.9647
14.3579	15.0604
14.3693	14.9935
14.3725	14.7002
14.3678	14.8428
14.366	14.9188
14.3668	15.0584
14.3642	15.0936
14.3702	14.9782
14.367	14.9829
14.3719	15.0203
14.368	14.8895
14.3703	15.0309
14.367	15.0154
14.3717	14.9418
14.3662	15.0719
14.3669	14.8525
14.368	15.1426
14.3685	14.9615
14.3616	14.9625
14.3642	14.9994
14.3677	15.0796
14.37	14.985
14.3778	14.9663
14.3696	14.9063
14.3697	14.9207
14.3665	15.0542
14.3714	15.0338
14.3728	15.0316
14.3671	14.9209
14.3709	15.0089
14.3713	15.0398
14.3768	14.9205
14.3727	14.9706
14.3663	14.9869
14.3776	15.0404
14.3725	14.9835
14.3705	14.8657
14.3665	15.031
14.3772	15.0316
14.3662	15.0403
14.3682	14.8986
14.3653	15.1383
14.3691	14.9187
14.3701	15.0893
14.3706	14.9709
14.3677	14.9784
14.3642	14.9823
14.3804	15.0571
14.394	15.0396
14.393	14.6153
14.3944	14.8705
14.397	14.9649
14.3962	14.9872
14.3961	15.0039
14.3926	14.9585
14.3973	14.9712
14.4002	15.081
14.395	14.9052
14.3938	15.1292
14.3981	15.1015
14.3949	15.0306
14.4014	14.9881
14.3997	14.9651
14.4021	15.0312
14.4004	14.9882
14.398	14.9144
14.399	15.0958
14.4023	14.9192
14.3949	15.0335
14.4036	14.9003
14.3952	15.0784
14.4006	14.937
14.3965	15.0428
14.4014	14.9404
14.3999	15.077
14.3907	14.907
14.395	15.0163
14.3928	15.1203
14.4002	14.9068
14.3981	14.9909
14.4025	14.9198
14.3995	15.12
14.3971	14.9068
14.399	15.021
14.397	15.0786
14.3916	14.9757
14.3981	14.9634
14.3992	15.0555
14.3967	15.0036
14.3919	14.8651
14.4014	15.0775
14.4004	14.9444
14.4005	15.0085
14.3954	14.9729
14.399	14.9496
14.3935	15.1351
14.3962	14.9391
14.3987	15.0776
14.399	14.8791
14.3988	15.0135
14.3991	14.9915
14.3983	15.0101
14.4067	15.0056
14.4004	15.024
14.4182	14.9791
14.415	15.0424
14.426	14.6583
14.4206	14.9882
14.4233	14.904
14.4156	15.0701
14.4162	15.0252
14.4352	15.0445
14.4437	15.0957
14.443	14.4568
14.4459	14.9621
14.4433	15.1027
14.4463	14.9307
14.4431	15.0164
14.4449	14.9885
14.4456	14.967
14.4394	15.0412
14.4485	15.0266
14.4396	15.017
14.4397	14.8795
14.4439	15.2007
14.4449	14.9875
14.4401	14.9464
14.4429	15.033
14.4422	14.9544
14.4372	15.0105
14.4438	15.0353
14.447	15.0157
14.4414	14.9566
14.4379	14.9936
14.4378	15.0243
14.4417	15.0339
14.4409	15.017
14.4385	14.9863
14.4474	14.9362
14.4441	15.0554
14.4341	14.8995
14.4367	15.0998
14.4446	14.9915
14.4462	14.9684
14.4447	14.8928
14.4428	14.9811
14.4441	14.9743
14.4428	15.0505
14.4461	14.9643
14.4485	15.0362
14.445	14.9355
14.4497	15.0658
14.4401	14.9187
14.4438	14.9982
14.4362	15.1576
14.4361	14.9157
14.4393	15.0922
14.4396	15.0172
14.4425	14.8738
14.4464	15.0496
14.4459	14.9057
14.4434	15.0467
14.4447	14.9336
14.443	15.0102
14.4471	14.9879
14.4452	15.0162
14.447	14.9975
14.4408	14.9411
14.4439	15.0281
14.4472	15.2093
14.4507	14.9342
14.4507	14.9545
14.445	14.914
14.4509	15.0231
14.4456	15.0625
14.4455	14.9377
14.4421	15.0874
14.4426	14.9787
14.4433	15.012
14.4407	14.9955
14.4368	14.9669
14.4447	15.0252
14.4438	15.0644
14.4429	14.8726
14.4414	15.0847
14.4413	15.0095
14.441	14.9753
14.4487	15.0178
14.4432	15.0201
14.4438	14.8711
14.4479	15.1839
14.4482	14.8789
14.4452	15.0445
14.4465	14.9517
14.4456	15.0305
14.4527	14.9373
14.4511	14.9445
14.4484	14.935
14.4452	14.9796
14.4472	15.0882
14.4431	15.0428
14.4514	14.9534
14.4527	15.0886
14.4478	14.8526
14.4491	14.9453
14.4471	15.0741
14.4462	14.9661
14.4429	15.0607
14.4424	15.0199
14.4407	15.0019
14.4455	15.0285
14.4483	14.9997
14.4511	14.9578
14.4502	15.0098
14.4483	15.0011
14.4512	14.9341
14.4421	15.067
14.4424	14.9636
14.4493	15.0823
14.4485	14.9927
14.4439	14.9532
14.4423	14.9691
14.4466	15.1378
14.4413	14.9828
14.4445	14.9152
14.4546	15.0188
14.4458	14.9093
14.4503	14.9649
14.4475	15.1177
14.4439	14.8598
14.4484	15.0926
14.4497	15.0628
14.4548	14.929
14.4466	15.0034
14.4468	14.9376
14.4492	15.1316
14.4523	14.958
14.4484	15.0136
14.4477	14.9373
14.4432	15.0096
14.4492	15.1026
14.4503	15.0288
14.4414	14.885
14.4423	15.063
14.4449	15.1134
14.4493	14.8923
14.4486	15.0356
14.4479	14.9166
14.4453	15.0642
14.4515	15.0348
14.448	15.0122
14.453	14.9225
14.45	15.0696
14.4534	14.8845
14.4514	15.0465
14.4529	15.0175
14.4554	14.958
14.4534	14.9328
14.4512	15.0048
14.4538	15.0844
14.4512	14.9891
14.4472	14.9006
14.4543	15.0706
14.4582	14.9904
14.4506	14.9586
14.451	14.9662
14.4446	15.0401
14.4546	14.8948
14.4506	15.1993
14.4463	14.8629
14.4522	15.0545
14.4492	15.0741
14.4542	14.9305
14.4499	15.0366
14.4499	14.9598
14.4491	15.0228
14.4477	14.9987
14.4505	14.9961
14.4436	15.1299
14.469	14.9105
14.4774	15.1221
14.4818	14.3732
14.4811	14.8347
14.473	15.018
14.4715	15.0546
14.4702	15.1022
14.4726	14.9494
14.4744	15.036
14.4738	14.9439
14.4717	15.0453
14.4705	14.9961
14.4768	15.0226
14.4775	14.9299
14.4737	15.0235
14.4751	14.9337
14.4726	15.0329
14.4726	15.0642
14.4793	14.9356
14.4745	15.0308
14.4727	14.8935
14.4758	14.9833
14.4755	15.0755
14.4708	14.8717
14.4837	15.15
14.4804	14.958
14.4787	14.89
14.4809	15.0239
14.4747	15.071
14.4767	14.9075
14.4792	15.1341
14.4837	15.1481
14.4794	14.902
14.4741	14.999
14.4746	15.0557
14.4817	15.08
14.4979	14.9735
14.502	14.8644
14.5034	14.7624
14.4977	14.9238
14.498	14.972
14.5092	15.0067
14.5044	15.0013
14.5062	14.834
14.5001	15.1321
14.4929	15.0008
14.5024	15.0287
14.5016	15.0969
14.4997	14.8491
14.5002	15.0737
14.4928	14.983
14.4957	14.9539
14.5047	15.086
14.4984	14.967
14.5012	14.8957
14.5006	15.0953
14.501	14.9027
14.5008	15.039
14.4947	15.0633
14.5128	14.9369
14.5284	15.1386
14.5267	14.497
14.5234	14.8259
14.5215	15.0209
14.5254	15.085
14.5257	14.9339
14.5192	14.9891
14.5313	15.0165
14.5239	14.9471
14.5309	15.008
14.527	15.0006
14.5261	14.9973
14.5248	14.9922
14.5198	14.9355
14.5198	15.005
14.5232	15.0957
14.5205	15.0083
14.5244	14.9935
14.5255	14.9801
14.5243	14.8844
14.5225	14.993
14.5192	15.0139
14.522	15.085
14.5201	15.0154
14.5187	14.9986
14.5201	15.0522
14.5211	15.0228
14.5221	14.9092
14.5269	15.0138
14.523	15.0341
14.525	14.9039
14.5253	15.0078
14.5302	14.9509
14.5257	15.0361
14.5169	14.9208
14.5277	15.0533
14.5245	15.0726
14.5255	14.8956
14.5282	14.9899
14.522	14.9736
14.5297	14.9532
14.5287	15.1128
14.5247	14.9949
14.5236	15.0028
14.5265	15.0053
14.5354	15.0021
14.5259	15.0451
14.524	14.9
14.5274	15.0742
14.5267	14.9222
14.5234	15.0259
14.5292	15.0088
14.5208	15.0624
14.5281	14.8523
14.5331	15.1041
14.5214	14.8938
14.5302	15.1092
14.5311	14.9855
14.5232	14.9221
14.5207	14.9922
14.5252	15.0355
14.5282	15.0644
14.5226	14.9123
14.5266	14.9982
14.5244	15.0376
14.5257	14.9794
14.518	14.9806
14.5271	14.9883
14.5251	15.1976
14.5288	14.8525
14.5317	14.9712
14.5254	14.9638
14.5292	14.9935
14.5232	14.9795
14.531	15.0036
14.531	15.1038
14.5301	14.8981
14.5308	14.9175
14.5242	15.027
14.5238	14.9758
14.5284	15.0987
14.5231	14.9347
14.5311	15.0271
14.5429	15.0056
14.5493	14.8908
14.5506	14.8532
14.549	14.9322
14.5537	14.9624
14.5561	14.9848
14.5471	14.9267
14.5448	14.9857
14.5503	15.1703
14.5487	14.9373
14.5514	14.9814
14.5404	14.9771
14.5437	14.9902
14.5493	15.1325
14.5505	14.9165
14.5463	14.9586
14.543	14.975
14.5492	15.108
14.5512	15.0201
14.5491	14.8936
14.5513	15.0185
14.5439	14.974
14.5511	15.0031
14.5476	15.1204
14.5536	14.8762
14.5507	15.0201
14.5603	14.9037
14.5566	15.0042
14.5552	14.8927
14.5585	15.0558
14.5619	14.9845
14.5736	14.9255
14.577	14.9188
14.5781	14.9313
14.5828	14.952
14.5789	14.9862
14.5807	14.8852
14.5837	15.2013
14.5801	14.9195
14.5753	15.0726
14.5739	14.9696
14.583	15.173
14.5833	14.9089
14.5787	14.9733
14.5797	14.944
14.5771	15.0895
14.5801	14.9363
14.5851	15.0625
14.5841	14.8618
14.5872	14.9696
14.5781	15.013
14.5846	15.0068
14.5825	15.1176
14.5753	14.9653
14.5864	15.0529
14.5864	15.0864
14.583	14.8537
14.5823	15.0381
14.5804	14.9954
14.584	15.0408
14.5845	14.9089
14.5796	15.0462
14.5884	14.956
14.5828	15.0338
14.5849	14.9475
14.5841	15.1131
14.5871	14.9024
14.5816	15.0596
14.5791	14.9056
14.5764	15.1034
14.5766	14.9497
14.5778	15.0898
14.5743	15.0044
14.5786	15.0284
14.5806	14.9396
14.5821	14.9854
14.5798	14.9843
14.5768	15.0145
14.5791	15.0031
14.5795	15.0309
14.5759	14.9286
14.5752	14.9312
14.5756	15.1128
14.5829	14.9899
14.5736	15.034
14.5683	14.9146
14.5759	15.0333
14.5776	15.0156
14.5764	14.9453
14.5768	15.0733
14.5776	14.9802
14.5767	15.0428
14.5824	15.0088
14.5857	14.9894
14.5785	14.935
14.5746	14.9744
14.5805	15.0768
14.5819	15.0685
14.5766	14.8759
14.5726	15.0519
14.579	15.0212
14.5789	15.0573
14.5793	14.889
14.579	15.0597
14.5788	15.0152
14.5855	15.0263
14.5782	15.0554
14.578	14.8388
14.5858	15.0134
14.5832	14.9577
14.5785	14.92
14.5814	15.0586
14.5827	15.07
14.5821	14.9449
14.5711	15.0277
14.5815	15.0526
14.5821	15.0442
14.5813	14.9698
14.5847	14.9413
14.5847	15.016
14.5807	14.9226
14.5784	15.0159
14.5828	15.0759
14.5822	14.9431
14.5789	15.0264
14.5782	14.999
14.5752	14.9386
14.5793	14.9937
14.582	15.0733
14.5836	14.9608
14.5858	14.9284
14.5802	15.0188
14.587	14.9585
14.5807	15.0808
14.5814	14.9999
14.5825	14.9696
14.5813	15.0032
14.5768	15.083
14.5765	14.8895
14.5795	15.084
14.5754	14.7764
14.5826	15.1317
14.5827	14.9875
14.5793	14.8802
14.5778	15.0217
14.5997	15.0844
14.6093	14.974
14.603	14.6603
14.6026	14.927
14.6068	15.1228
14.6038	14.9251
14.6043	15.0532
14.6138	15.0076
14.6068	15.0046
14.6065	14.8296
14.6111	15.1612
14.6075	15.0267
14.6077	14.9843
14.6073	14.9993
14.609	14.9625
14.6085	15.0279
14.6096	14.9951
14.6077	15.0167
14.6064	14.9819
14.6113	15.0549
14.6046	15.0113
14.61	14.8368
14.6081	15.1498
14.6089	14.9919
14.6037	14.984
14.6111	15.0656
14.6068	14.8755
14.6113	15.0616
14.6062	15.0474
14.6112	14.9457
14.6027	15.0115
14.6027	14.9843
14.6104	15.0493
14.6011	15.0092
14.6032	14.9159
14.6032	15.1185
14.6001	14.9015
14.6028	15.1259
14.6082	14.9663
14.6092	14.9671
14.6111	14.963
14.604	14.986
14.6095	14.9981
14.6063	15.0456
14.6159	14.974
14.609	15.0418
14.6054	14.9465
14.6108	15.0855
14.6108	14.8775
14.6091	15.0163
14.606	14.9465
14.6052	15.0651
14.607	15.0186
14.6068	15.0094
14.6062	14.9112
14.6083	15.0304
14.6047	15.013
14.6021	15.0071
14.602	15.0596
14.6076	15.0315
14.6074	14.9484
14.6072	14.8845
14.6065	15.0703
14.6139	14.8887
14.6163	15.0502
14.6067	14.9724
14.602	14.9636
14.6066	15.1123
14.6068	15.054
14.602	14.9829
14.6049	14.9383
14.6104	15.0723
14.6057	14.9691
14.6041	14.8485
14.6046	15.1457
14.606	14.9902
14.6055	14.9415
14.6263	14.9718
14.6261	14.9415
14.6348	14.6042
14.6301	15.0309
14.6272	14.9376
14.6287	15.0153
14.6321	15.0357
14.6306	14.9826
14.6268	14.975
14.6308	14.9913
14.632	15.0159
14.6351	14.9776
14.6337	14.9687
14.6346	14.9623
14.631	15.0855
14.6299	15.0014
14.6289	15.0193
14.6337	15.0283
14.6279	14.9077
14.6382	14.9934
14.6312	15.0011
14.6382	14.8922
14.6329	15.1158
14.6302	14.8781
14.633	15.0864
14.6339	14.9667
14.6348	14.9801
14.6345	15.0302
14.633	14.985
14.6321	14.9777
14.6326	14.9759
14.6379	14.9925
14.6354	14.9672
14.6337	14.9711
14.6322	15.0555
14.63	15.0301
14.6274	15.0252
14.6277	15
14.6281	15.0551
14.6338	14.9644
14.6294	15.0414
14.6364	14.8577
14.6319	15.0112
14.6336	14.9763
14.6328	15.0257
14.6351	14.9268
14.6396	15.0737
14.6347	14.9386
14.6333	15.0262
14.6593	15.0872
14.6529	14.971
14.6554	14.5986
14.6591	15.0605
14.6547	14.9128
14.6532	14.9434
14.6607	15.1036
14.6596	14.9118
14.6573	14.9695
14.6587	15.0146
14.6603	15.0556
14.6594	14.8731
14.6586	15.0376
14.6602	14.9996
14.662	15.0337
14.6616	14.9715
14.6574	14.991
14.6565	15.0023
14.6557	14.9713
14.6574	15.0538
14.6568	14.9698
14.6599	15.0261
14.6618	15.0205
14.6703	15.0038
14.6689	14.9552
14.6627	14.8959
14.659	14.9333
14.6627	15.0772
14.6636	15.0708
14.664	14.8625
14.6645	15.0012
14.6621	14.911
14.6546	15.0493
14.6583	15.1009
14.6609	15.0197
14.6631	15.0214
14.6679	14.9206
14.6565	14.9332
14.6668	14.9364
14.6584	15.085
14.6647	14.9416
14.6596	15.1688
14.666	14.9047
14.6637	14.9986
14.6582	14.9332
14.659	15.0047
14.6621	15.0976
14.664	14.9697
14.662	14.9647
14.6623	14.96
14.6632	15.0175
14.6699	14.9672
14.6715	15.0324
14.6613	14.8774
14.6641	15.0164
14.6623	15.1193
14.6693	14.9036
14.6681	15.0504
14.6679	14.8594
14.6609	15.0833
14.6681	14.9588
14.6675	15.0537
14.6618	14.9164
14.6619	15.0759
14.6642	14.9748
14.6708	14.9567
14.6665	15.0164
14.6632	14.9432
14.6666	15.0344
14.6711	14.9884
14.6725	14.863
14.6631	14.9253
14.6605	15.0113
14.6655	15.1467
14.6712	15.1161
14.67	14.8409
14.6671	14.9681
14.6602	15.0244
14.6704	15.0466
14.6717	15.0424
14.6713	14.8621
14.6756	14.9685
14.6685	15.0105
14.668	14.9834
14.6714	15.0663
14.6767	14.9766
14.66	15.0653
14.6702	14.874
14.6819	15.1914
14.6922	14.9611
14.6911	14.6755
14.6903	14.9144
14.6855	15.0174
14.689	15.0737
14.6918	15.0204
14.6919	14.8629
14.6894	14.9897
14.6939	15.0731
14.6867	14.9928
14.687	14.8994
14.6899	15.1446
14.6918	14.9533
14.6835	14.9904
14.6854	14.9727
14.6913	15.1142
14.6836	14.9723
14.6803	14.9706
14.6877	15.0312
14.691	15.0195
14.6838	14.8439
14.6915	15.005
14.6866	15.0456
14.6855	15.052
14.6844	14.9778
14.6886	15.0101
14.6875	15.0855
14.6861	14.9277
14.6867	15.022
14.6826	14.9725
14.6912	15.0654
14.6952	14.9743
14.707	14.8673
14.7103	14.9214
14.7116	14.7918
14.7177	14.9596
14.7146	14.943
14.7109	14.8798
14.718	15.149
14.717	15.006
14.7035	14.9274
14.71	15.0465
14.7167	15.1795
14.7166	14.8866
14.7161	14.9012
14.7187	14.973
14.719	14.985
14.7104	14.9844
14.7185	15.0027
14.7154	15.1029
14.7147	14.9617
14.7187	15.0489
14.7172	14.8892
14.7212	15.0232
14.7153	15.0153
14.7134	14.966
14.7179	15.0764
14.7179	14.9109
14.7155	15.0303
14.7155	14.9657
14.708	15.0409
14.7123	15.0254
14.7093	15.0575
14.7121	14.9619
14.711	15.0283
14.7114	14.9183
14.7161	15.0208
14.7107	14.9319
14.7071	15.0202
14.7089	15.148
14.7149	14.9808
14.7119	14.9554
14.7146	14.9767
14.7175	15.0013
14.7134	14.9471
14.7146	15.0109
14.7117	15.0431
14.7121	14.9337
14.7107	15.0261
14.7111	15.0197
14.7105	15.0139
14.7107	14.9659
14.711	15.1004
14.7172	14.9357
14.7116	15.0336
14.7081	14.9933
14.7114	15.0416
14.7118	14.9819
14.708	14.9514
14.7099	15.0168
14.7097	14.9739
14.7104	15.0002
14.7099	15.0053
14.7114	15.0444
14.7064	15.0486
14.7095	14.8701
14.7088	15.1337
14.7106	14.9581
14.7128	15.0224
14.7087	14.9831
14.7125	14.8697
14.7174	15.1052
14.7086	14.865
14.716	14.9563
14.7177	15.0983
14.7167	14.9037
14.7179	14.9924
14.709	15.03
14.7119	14.9733
14.7138	15.0644
14.7117	15.0305
14.7157	14.9962
14.7158	15.0001
14.7191	15.018
14.7166	14.9297
14.716	14.9859
14.7138	15.1075
14.7128	14.9672
14.7152	15.0669
14.714	14.9922
14.7142	14.9289
14.715	15.0035
14.713	15.0392
14.7146	14.9419
14.7083	15.0598
14.7133	15.0216
14.7092	15.0427
14.7159	15.0068
14.7092	14.9669
14.7115	14.9589
14.7182	15.043
14.7306	14.9843
14.7347	14.3631
14.7329	14.8958
14.735	14.8947
14.7396	15.0316
14.734	14.9937
14.7376	14.9394
14.7362	15.0245
14.738	14.9447
14.7395	15.0462
14.7454	14.9899
14.7411	14.9781
14.7452	14.9674
14.7447	14.9784
14.7419	14.9957
14.7363	15.03
14.742	15.0516
14.7378	15.0514
14.7405	14.8333
14.7447	15.1259
14.7423	14.8707
14.7393	14.9921
14.7304	14.9329
14.7347	15.1076
14.7394	15.1171
14.7492	14.8522
14.7393	14.9928
14.7438	14.873
14.7426	15.1611
14.744	15.008
14.7426	14.9553
14.7401	15.0354
14.7358	15.0022
14.7388	15.007
14.7394	15.1045
14.7403	14.9469
14.7408	15.0034
14.7338	15.0234
14.7382	15.007
14.739	15.0827
14.7375	14.9582
14.7328	14.9261
14.7377	15.0688
14.7421	15.0563
14.7469	14.9367
14.745	14.9105
14.7389	14.9592
14.7465	15.0241
14.7455	15.077
14.7429	14.8995
14.7389	15.0556
14.7382	15.04
14.7385	15.0096
14.7446	14.9827
14.7439	15.0172
14.7451	14.9815
14.7387	15.0024
14.7419	14.9597
14.7426	15.1117
14.7455	14.8794
14.7466	15.0836
14.7458	14.9264
14.7374	15.044
14.7441	15.0865
14.7619	15.0242
14.7668	14.8739
14.7613	14.6765
14.7618	15.0046
14.7593	15.0744
14.7613	14.9435
14.7659	15.0158
14.7678	14.9526
14.7676	15.0093
14.7585	14.9972
14.7643	15.0753
14.7639	15.0593
14.7626	14.8901
14.7645	15.0793
14.7673	14.927
14.7678	14.9988
14.7614	14.9755
14.7667	14.9867
14.7602	15.0963
14.7624	14.9065
14.7679	15.0954
14.7661	14.9621
14.7672	14.9278
14.7657	14.9897
14.7655	14.9605
14.7687	15.1783
14.763	14.8796
14.7586	14.9438
14.7627	15.1142
14.7699	15.0263
14.7783	14.9089
14.7873	14.9142
14.7809	14.8743
14.7837	14.8486
14.7867	15.1321
14.7857	14.9393
14.7852	14.9272
14.789	15.0427
14.7912	14.8948
14.7869	15.0215
14.7911	14.9625
14.787	15.0719
14.7866	14.9505
14.7855	15.0682
14.7875	15.0012
14.7834	15.0473
14.7861	14.9537
14.7866	15.0545
14.7895	15.0186
14.789	14.9703
14.7835	14.9411
14.7855	14.9869
14.787	15.1152
14.7838	14.9064
14.787	15.0265
14.7846	15.0696
14.7821	14.9784
14.7765	15.0515
14.7845	14.9894
14.7871	15.0492
14.7858	14.9003
14.7963	14.9925
14.8038	15.026
14.8035	14.7941
14.8114	14.9243
14.8099	14.9263
14.8167	14.9143
14.8161	15.0312
14.8138	14.9067
14.8063	15.0299
14.8048	14.9569
14.8167	15.1344
14.8084	14.9851
14.8162	14.8514
14.806	15.1128
14.8077	14.8717
14.8052	15.1449
14.8044	14.9251
14.8135	15.0774
14.8061	14.9951
14.8081	14.8817
14.812	15.1318
14.8107	14.8829
14.8144	14.9722
14.8116	15.1041
14.807	14.8958
14.8093	15.0694
14.8093	15.0533
14.8162	14.9361
14.8173	14.9766
14.8115	14.8461
14.8154	15.086
14.813	15.0557
14.816	14.8867
14.8079	15.0131
14.8117	15.0325
14.813	15.0665
14.821	14.9494
14.8115	15.0228
14.8124	14.8828
14.8144	15.1047
14.8142	14.9527
14.8156	14.9951
14.817	14.9784
14.8145	14.9855
14.8076	15.0272
14.8109	15.0424
14.8091	15.0896
14.8097	14.9204
14.8062	15.0479
14.8099	14.9316
14.8054	15.131
14.8079	14.9089
14.8062	15.0633
14.8092	14.9471
14.8181	15.0741
14.8119	14.9494
14.8101	14.8863
14.8123	15.0807
14.8155	14.9934
14.8072	14.99
14.8133	14.9553
14.8102	15.0678
14.8103	14.9561
14.8099	15.0424
14.8083	15.0877
14.8083	14.9851
14.8104	15.0045
14.8047	14.9518
14.8109	14.9816
14.8069	15.0925
14.8061	14.9383
14.8098	15.0521
14.8049	14.9835
14.8202	14.9673
14.8159	15.0692
14.8128	14.7963
14.8083	15.0591
14.8098	15.1341
14.8119	14.991
14.8165	14.9676
14.8172	15.0399
14.81	14.921
14.8176	15.0085
14.8102	15.075
14.8154	14.8667
14.8109	15.1462
14.81	14.9383
14.8169	15.0533
14.8119	15.0606
14.8145	14.8708
14.8111	15.0446
14.8158	15.1252
14.8103	14.971
14.8147	15.006
14.8132	15.0471
14.8125	14.8719
14.8101	14.9635
14.8125	15.0907
14.8106	14.9463
14.8062	15.0711
14.8093	14.9465
14.8123	14.9956
14.8054	15.0339
14.8069	15.0163
14.8053	15.0663
14.8115	15.0029
14.8091	14.9808
14.8088	14.9409
14.8099	15.0259
14.8124	14.9869
14.809	14.9872
14.8074	14.9121
14.8246	15.1068
14.834	15.071
14.8342	14.59
14.8369	14.8525
14.8261	14.9719
14.834	15.0553
14.8242	15.1034
14.8306	14.8908
14.825	15.1038
14.8274	14.9468
14.8291	15.1181
14.8239	14.9342
14.8256	15.0049
14.8304	15.0818
14.828	14.9341
14.8279	14.9645
14.8286	15.1726
14.829	14.9235
14.8324	15.0684
14.8298	14.9352
14.8265	14.9805
14.8298	14.9263
14.8271	15.0151
14.8285	15.0106
14.8214	15.0192
14.8249	14.9478
14.8324	15.1663
14.826	14.843
14.8251	14.9804
14.8261	14.9341
14.8284	15.1214
14.8338	14.8993
14.8332	14.9769
14.8336	15.0146
14.8314	15.022
14.827	14.9607
14.8379	15.0156
14.8417	15.0496
14.8559	14.8948
14.8506	14.8837
14.8528	14.7545
14.851	15.0115
14.8528	15.0062
14.8614	14.9353
14.8543	15.0243
14.8621	14.8681
14.8817	15.0733
14.8779	14.7945
14.8818	14.8135
14.8862	14.9629
14.878	14.9637
14.8779	14.9815
14.8788	15.1194
14.8783	15.0062
14.883	14.9527
14.8804	15.0376
14.8791	14.913
14.8821	15.0932
14.8818	14.9886
14.8767	14.9922
14.8758	14.9887
14.8766	15.1251
14.8716	15.003
14.8799	14.971
14.8816	15.0488
14.8853	14.86
14.8854	15.004
14.8854	14.931
14.8848	15.1051
14.8818	14.8716
14.8813	15.0505
14.8813	15.004
14.8867	14.9991
14.8881	14.9873
14.8777	14.8935
14.8791	15.1047
14.8815	15.0418
14.8823	15.0373
14.8831	14.9789
14.8768	14.9457
14.883	15.007
14.8839	15.0642
14.8798	14.9372
14.8832	14.9885
14.8754	15.0246
14.8801	14.9263
14.885	15.1457
14.8792	14.9743
14.8809	14.9463
14.8821	15.0838
14.879	14.9875
14.8813	14.9359
14.8808	15.0475
14.8844	14.9691
14.8842	14.9645
14.8784	15.015
14.8758	14.954
14.8758	15.1227
14.8788	15.0556
14.8784	14.9069
14.8818	15.0103
14.8767	14.9632
14.8756	14.977
14.8794	15.0115
14.8818	15.0225
14.8785	14.9817
14.8846	14.9987
14.8811	14.9903
14.884	14.9422
14.8835	15.027
14.8823	14.9608
14.8817	15.0717
14.8776	14.9493
14.8778	14.9809
14.8767	15.0943
14.8792	14.9995
14.8741	14.9264
14.8821	14.9812
14.8783	15.0884
14.8834	14.8239
14.8836	15.1104
14.8872	14.9246
14.8799	14.9223
14.8836	15.102
14.8808	15.0457
14.8795	14.9839
14.8843	15.008
14.8794	15.0149
14.8807	15.0197
14.8821	14.8766
14.883	15.0641
14.8787	15.0666
14.885	14.8801
14.8798	15.1157
14.8847	14.8432
14.8786	15.1019
14.8799	14.9677
14.888	15.0257
14.8867	15.0357
14.8777	14.8431
14.8805	15.0182
14.8794	15.0808
14.882	14.9667
14.8841	15.073
14.8827	14.9619
14.8832	14.9843
14.8819	14.9863
14.8808	15.0082
14.8747	14.9829
14.8806	15.0446
14.884	15.05
14.8813	14.8972
14.8777	15.0083
14.8807	15.0668
14.8756	15.0474
14.8796	14.8603
14.8834	15.1301
14.8793	14.9649
14.8772	14.9298
14.8784	14.9539
14.8808	15.081
14.8883	15.0019
14.8837	14.8626
14.8847	15.0526
14.8936	15.0105
14.8877	14.9923
14.8879	14.9226
14.8818	15.1745
14.8869	14.9693
14.8862	15.0926
14.885	14.9494
14.8845	15.0491
14.8846	14.914
14.8851	15.0626
14.8896	14.9949
14.8863	14.9924
14.8867	15.013
14.8833	14.925
14.8823	15.0289
14.8852	15.0418
14.8808	15.0113
14.8911	14.9236
14.8825	15.0827
14.8829	14.9051
14.8911	15.0048
14.8766	14.9939
14.885	14.9746
14.884	15.091
14.8875	15.0105
14.8798	14.9565
14.8859	14.935
14.8904	15.1013
14.8866	14.9006
14.8845	14.9639
14.8845	15.0066
14.8846	15.0624
14.8837	15.0485
14.8773	14.9763
14.8784	15.0098
14.8793	14.9894
14.8791	15.0712
14.8819	14.9346
14.8817	15.014
14.8846	15.0137
14.8765	14.9688
14.8862	14.99
14.8868	15.13
14.8834	14.8914
14.8822	14.9554
14.8873	15.1222
14.8846	15.0028
14.8781	14.9654
14.8833	15.0724
14.8883	15.0348
14.8855	14.9493
14.89	14.9325
14.8853	14.9689
14.8876	15.1762
14.8788	14.9178
14.8807	15.0205
14.8849	15.0886
14.8794	15.0854
14.8821	14.917
14.879	15.0227
14.8843	14.9622
14.8833	14.9686
14.8819	14.9499
14.8798	14.9656
14.8841	15.0685
14.8809	14.9826
14.8815	14.9559
14.883	15.0366
14.8923	15.0186
14.8921	14.9081
14.8879	14.9975
14.8889	14.934
14.8805	15.1442
14.8788	14.9545
14.8815	15.1103
14.8837	14.9573
14.8882	15.0075
14.8847	14.9229
14.8851	14.9306
14.8881	15.0802
14.8893	14.9378
14.8942	14.9802
14.8877	15.0204
14.8913	14.8805
14.891	15.0956
14.8894	14.9993
14.8838	14.9647
14.8881	14.9775
14.8938	15.0517
14.8877	14.9963
14.8817	14.8963
14.883	15.026
14.8875	15.1249
14.883	15.0173
14.8863	14.9628
14.8955	15.0004
14.8849	15.0173
14.889	14.8366
14.8821	15.1653
14.8859	14.9267
14.884	15.1071
14.8862	15.0558
14.8842	14.9326
14.8803	14.9245
14.8828	15.0274
14.8789	15.0215
14.8862	14.9889
14.8798	15.0014
14.8854	15.0367
14.8806	14.9998
14.886	14.9705
14.8845	15.0153
14.8834	15.0218
14.8808	14.978
14.8823	15.0749
14.8819	15.0528
14.8834	14.9222
14.8844	14.9914
14.8852	15.0401
14.8838	14.9299
14.8843	14.975
14.8821	15.0576
14.8774	14.9038
14.8878	15.0432
14.8878	15.0804
14.8809	14.8576
14.8821	14.9471
14.887	15.1501
14.8836	14.9194
14.8852	14.9324
14.886	15.0317
14.8861	14.9645
14.8821	15.0081
14.8786	15.0021
14.8831	15.055
14.8844	14.9446
14.8832	14.9424
14.8884	14.95
14.8818	15.0334
14.8784	14.95
14.8819	15.0758
14.8842	15.0139
14.8885	14.93
14.878	14.9776
14.8798	14.9882
14.8796	15.1072
14.8794	14.9895
14.882	15.0374
14.8827	14.9467
14.885	15.0754
14.9122	14.8742
14.9045	14.9309
14.9034	14.6035
14.9053	15.0217
14.9045	15.059
14.8946	14.85
14.9033	15.0903
14.9079	15.1168
14.9114	14.9182
14.9079	14.8968
14.9056	14.9703
14.9102	15.1047
14.908	14.9687
14.9052	14.8869
14.9068	15.079
14.9049	14.9732
14.9046	15.0701
14.9039	14.9917
14.9071	14.9703
14.9101	14.9631
14.9106	15.0261
14.9126	14.9138
14.9112	15.037
14.913	14.9375
14.9118	15.0931
14.9114	14.9444
14.909	14.9854
14.9048	15.0239
14.9116	15.0229
14.9116	15.021
14.9095	14.8197
14.9126	15.0023
14.9144	15.0351
14.9118	14.9683
14.9154	15.0321
14.9116	15.0201
14.9121	15.006
14.9065	14.9885
14.9099	14.9848
14.9091	15.0787
14.907	14.9775
14.914	14.9614
14.9101	15.0019
14.9117	14.9412
14.9124	15.0183
14.9067	15.0462
14.9069	14.957
14.9085	15.0431
14.9078	14.9795
14.9137	15.0016
14.9092	15.0322
14.91	14.9761
14.9079	14.9587
14.9044	14.996
14.9024	15.0536
14.9113	15.0974
14.9038	14.949
14.9049	15.0028
14.9086	15.0827
14.9049	14.9703
14.9084	14.9449
14.9072	14.9554
14.9033	14.9597
14.91	15.0554
14.9059	15.073
14.9081	14.8916
14.9091	15.073
14.9099	15.002
14.9105	14.9471
14.9098	14.9604
14.9111	14.9913
14.907	14.994
14.9074	14.9903
14.9108	15.0815
14.9071	14.9967
14.9063	14.9157
14.9136	14.9548
14.9051	15.0386
14.9076	14.8684
14.9123	15.1348
14.908	15.0327
14.9043	14.8841
14.9099	15.138
14.9128	14.9804
14.9108	14.9344
14.9079	14.93
14.9086	15.0473
14.9147	15.0437
14.9051	14.9286
14.911	14.972
14.9101	15.0903
14.9054	14.9653
14.9109	15.0617
14.9137	15.0383
14.9067	14.8917
14.9124	15.0984
14.9052	15.027
14.9091	14.9432
14.9062	15.088
14.9108	15.0094
14.9287	14.985
14.9283	15.0105
14.9279	14.6988
14.9305	14.9198
14.9265	15.0426
14.9288	14.9971
14.937	15.0028
14.9344	14.9607
14.9378	14.8453
14.9335	15.0633
14.9244	14.9431
14.93	15.0518
14.9467	15.1121
14.9773	14.9148
15.0088	15.0511
15.0398	15.7306
15.0664	16.2312
15.0984	17.2114
15.1049	18.1272
15.1003	19.0904
15.1033	19.9094
15.1016	20.0594
15.1	19.9184
15.1033	20.0822
15.1051	20.0137
15.0993	20.007
15.1032	19.8951
15.1068	20.105
15.1055	19.9236
15.1053	19.9335
15.1142	20.0341
15.1079	19.9278
15.102	19.9619
15.1063	20.1204
15.1096	20.0514
15.1034	20.0198
15.1036	19.9381
15.1025	20.1235
15.1035	20.0727
15.1051	19.9763
15.0939	19.9779
15.1131	19.9262
15.125	20.1726
15.1265	19.5836
15.1261	19.9075
15.1263	19.9649
15.1271	20.0694
15.1217	19.9618
15.1244	19.963
15.1287	20.0816
15.1254	19.9232
15.1247	19.9625
15.1269	20.0165
15.1277	19.974
15.1248	19.9981
15.1259	19.9721
15.1285	20.0881
15.1296	20.0419
15.1225	19.9833
15.124	19.931
15.1292	19.9772
15.1292	20.0814
15.1241	20.0703
15.1257	19.9216
15.1257	19.9992
15.1245	20.0663
15.127	19.9814
15.1261	19.9977
15.1264	19.983
15.1273	20.0282
15.1287	19.9897
15.1258	20.0168
15.126	19.9481

## Sheet: Panel C
time	distance		Y intercept of first horizontal line
69.5289	14.6348		14.6634 um
69.5955	14.6351		0.025 um spacing after that
69.6622	14.6337
69.7289	14.6346
69.7955	14.6337
69.8622	14.6382
69.9289	14.6382
69.9955	14.6339
70.0622	14.6348
70.1288	14.6345
70.1955	14.6379
70.2622	14.6354
70.3288	14.6337
70.3955	14.6338
70.4622	14.6364
70.5288	14.6336
70.5955	14.6351
70.6621	14.6396
70.7288	14.6347
70.7955	14.6593
70.8621	14.6529
70.9288	14.6554
70.9955	14.6591
71.0621	14.6547
71.1288	14.6532
71.1954	14.6607
71.2621	14.6596
71.3288	14.6573
71.3954	14.6587
71.4621	14.6603
71.5288	14.6594
71.5954	14.6586
71.6621	14.6602
71.7287	14.662
71.7954	14.6616
71.8621	14.6574
71.9287	14.6565
71.9954	14.6557
72.0621	14.6574
72.1287	14.6568
72.1954	14.6599
72.262	14.6618
72.3287	14.6703
72.3954	14.6689
72.462	14.6627
72.5287	14.659
72.5954	14.6627
72.662	14.6636
72.7287	14.664
72.7953	14.6645
72.862	14.6621
72.9287	14.6546
72.9953	14.6583
73.062	14.6609
73.1287	14.6631
73.1953	14.6679
73.262	14.6565
73.3286	14.6668
73.3953	14.6584
73.462	14.6647
73.5286	14.6596
73.5953	14.666
73.662	14.6637
73.7286	14.6582
73.7953	14.659
73.8619	14.6621
73.9286	14.664
73.9953	14.662
74.0619	14.6623
74.1286	14.6632
74.1953	14.6699
74.2619	14.6715
74.3286	14.6613
74.3952	14.6641
74.4619	14.6623
74.5286	14.6693
74.5952	14.6681
74.6619	14.6679
74.7286	14.6609
74.7952	14.6681
74.8619	14.6675
74.9285	14.6618
74.9952	14.6619
75.0619	14.6642
75.1285	14.6708
75.1952	14.6665
75.2618	14.6632
75.3285	14.6666
75.3952	14.6711
75.4618	14.6725
75.5285	14.6631
75.5952	14.6605
75.6618	14.6655
75.7285	14.6712
75.7951	14.67
75.8618	14.6671
75.9285	14.6602
75.9951	14.6704
76.0618	14.6717
76.1285	14.6713
76.1951	14.6756
76.2618	14.6685
76.3284	14.668
76.3951	14.6714
76.4618	14.6767
76.5284	14.66
76.5951	14.6702
76.6618	14.6819
76.7284	14.6922
76.7951	14.6911
76.8617	14.6903
76.9284	14.6855
76.9951	14.689
77.0617	14.6918
77.1284	14.6919
77.1951	14.6894
77.2617	14.6939
77.3284	14.6867
77.395	14.687
77.4617	14.6899
77.5284	14.6918
77.595	14.6835
77.6617	14.6854
77.7284	14.6913
77.795	14.6836
77.8617	14.6803
77.9283	14.6877
77.995	14.691
78.0617	14.6838
78.1283	14.6915
78.195	14.6866
78.2617	14.6855
78.3283	14.6844
78.395	14.6886
78.4616	14.6875
78.5283	14.6861
78.595	14.6867
78.6616	14.6826
78.7283	14.6912
78.795	14.6952
78.8616	14.707
78.9283	14.7103
78.9949	14.7116
79.0616	14.7177
79.1283	14.7146
79.1949	14.7109
79.2616	14.718
79.3283	14.717
79.3949	14.7035
79.4616	14.71
79.5282	14.7167
79.5949	14.7166
79.6616	14.7161
79.7282	14.7187
79.7949	14.719
79.8616	14.7104
79.9282	14.7185
79.9949	14.7154
80.0615	14.7147
80.1282	14.7187
80.1949	14.7172
80.2615	14.7212
80.3282	14.7153
80.3949	14.7134
80.4615	14.7179
80.5282	14.7179
80.5948	14.7155
80.6615	14.7155
80.7282	14.708
80.7948	14.7123
80.8615	14.7093
80.9282	14.7121
80.9948	14.711
81.0615	14.7114
81.1281	14.7161
81.1948	14.7107
81.2615	14.7071
81.3281	14.7089
81.3948	14.7149
81.4615	14.7119
81.5281	14.7146
81.5948	14.7175
81.6614	14.7134
81.7281	14.7146
81.7948	14.7117
81.8614	14.7121
81.9281	14.7107
81.9948	14.7111
82.0614	14.7105
82.1281	14.7107
82.1947	14.711
82.2614	14.7172
82.3281	14.7116
82.3947	14.7081
82.4614	14.7114
82.5281	14.7118
82.5947	14.708
82.6614	14.7099
82.728	14.7097
82.7947	14.7104
82.8614	14.7099
82.928	14.7114
82.9947	14.7064
83.0614	14.7095
83.128	14.7088
83.1947	14.7106
83.2613	14.7128
83.328	14.7087
83.3947	14.7125
83.4613	14.7174
83.528	14.7086
83.5946	14.716
83.6613	14.7177
83.728	14.7167
83.7946	14.7179
83.8613	14.709
83.928	14.7119
83.9946	14.7138
84.0613	14.7117
84.1279	14.7157
84.1946	14.7158
84.2613	14.7191
84.3279	14.7166
84.3946	14.716
84.4613	14.7138
84.5279	14.7128
84.5946	14.7152
84.6612	14.714
84.7279	14.7142
84.7946	14.715
84.8612	14.713
84.9279	14.7146
84.9946	14.7083
85.0612	14.7133
85.1279	14.7092
85.1945	14.7159
85.2612	14.7092
85.3279	14.7115
85.3945	14.7182
85.4612	14.7306
85.5279	14.7347
85.5945	14.7329
85.6612	14.735
85.7278	14.7396
85.7945	14.734
85.8612	14.7376
85.9278	14.7362
85.9945	14.738
86.0612	14.7395
86.1278	14.7454
86.1945	14.7411
86.2611	14.7452
86.3278	14.7447
86.3945	14.7419
86.4611	14.7363
86.5278	14.742
86.5945	14.7378
86.6611	14.7405
86.7278	14.7447
86.7944	14.7423
86.8611	14.7393
86.9278	14.7304
86.9944	14.7347
87.0611	14.7394
87.1278	14.7492
87.1944	14.7393
87.2611	14.7438
87.3277	14.7426
87.3944	14.744
87.4611	14.7426
87.5277	14.7401
87.5944	14.7358
87.6611	14.7388
87.7277	14.7394
87.7944	14.7403
87.861	14.7408
87.9277	14.7338
87.9944	14.7382
88.061	14.739
88.1277	14.7375
88.1944	14.7328
88.261	14.7377
88.3277	14.7421
88.3943	14.7469
88.461	14.745
88.5277	14.7389
88.5943	14.7465
88.661	14.7455
88.7277	14.7429
88.7943	14.7389
88.861	14.7382
88.9276	14.7385
88.9943	14.7446
89.061	14.7439
89.1276	14.7451
89.1943	14.7387
89.261	14.7419
89.3276	14.7426
89.3943	14.7455
89.4609	14.7466
89.5276	14.7458
89.5943	14.7374
89.6609	14.7441
89.7276	14.7619
89.7943	14.7668
89.8609	14.7613
89.9276	14.7618
89.9942	14.7593
90.0609	14.7613
90.1276	14.7659
90.1942	14.7678
90.2609	14.7676
90.3276	14.7585
90.3942	14.7643
90.4609	14.7639
90.5275	14.7626
90.5942	14.7645
90.6609	14.7673
90.7275	14.7678
90.7942	14.7614
90.8609	14.7667
90.9275	14.7602
90.9942	14.7624
91.0608	14.7679
91.1275	14.7661
91.1942	14.7672
91.2608	14.7657
91.3275	14.7655
91.3942	14.7687
91.4608	14.763
91.5275	14.7586
91.5941	14.7627
91.6608	14.7699
91.7275	14.7783
91.7941	14.7873
91.8608	14.7809
91.9274	14.7837
91.9941	14.7867
92.0608	14.7857
92.1274	14.7852
92.1941	14.789
92.2608	14.7912
92.3274	14.7869
92.3941	14.7911
92.4607	14.787
92.5274	14.7866
92.5941	14.7855
92.6607	14.7875
92.7274	14.7834
92.7941	14.7861
92.8607	14.7866
92.9274	14.7895
92.994	14.789
93.0607	14.7835
93.1274	14.7855
93.194	14.787
93.2607	14.7838
93.3274	14.787
93.394	14.7846
93.4607	14.7821
93.5273	14.7765
93.594	14.7845
93.6607	14.7871
93.7273	14.7858
93.794	14.7963
93.8607	14.8038
93.9273	14.8035
93.994	14.8114
94.0606	14.8099
94.1273	14.8167
94.194	14.8161
94.2606	14.8138
94.3273	14.8063
94.394	14.8048
94.4606	14.8167
94.5273	14.8084
94.5939	14.8162
94.6606	14.806
94.7273	14.8077
94.7939	14.8052
94.8606	14.8044
94.9273	14.8135
94.9939	14.8061
95.0606	14.8081
95.1272	14.812
95.1939	14.8107
95.2606	14.8144
95.3272	14.8116
95.3939	14.807
95.4606	14.8093
95.5272	14.8093
95.5939	14.8162
95.6605	14.8173
95.7272	14.8115
95.7939	14.8154
95.8605	14.813
95.9272	14.816
95.9939	14.8079
96.0605	14.8117
96.1272	14.813
96.1938	14.821
96.2605	14.8115
96.3272	14.8124
96.3938	14.8144
96.4605	14.8142
96.5272	14.8156
96.5938	14.817
96.6605	14.8145
96.7271	14.8076
96.7938	14.8109
96.8605	14.8091
96.9271	14.8097
96.9938	14.8062
97.0605	14.8099
97.1271	14.8054
97.1938	14.8079
97.2604	14.8062
97.3271	14.8092
97.3938	14.8181
97.4604	14.8119
97.5271	14.8101
97.5938	14.8123
97.6604	14.8155
97.7271	14.8072
97.7937	14.8133
97.8604	14.8102
97.9271	14.8103
97.9937	14.8099
98.0604	14.8083
98.1271	14.8083
98.1937	14.8104
98.2604	14.8047
98.327	14.8109
98.3937	14.8069
98.4604	14.8061
98.527	14.8098
98.5937	14.8049
98.6604	14.8202
98.727	14.8159
98.7937	14.8128
98.8603	14.8083
98.927	14.8098
98.9937	14.8119
99.0603	14.8165
99.127	14.8172
99.1937	14.81
99.2603	14.8176
99.327	14.8102
99.3936	14.8154
99.4603	14.8109
99.527	14.81
99.5936	14.8169
99.6603	14.8119
99.727	14.8145
99.7936	14.8111
99.8603	14.8158
99.9269	14.8103
99.9936	14.8147
100.06	14.8132
100.127	14.8125
100.194	14.8101
100.26	14.8125
100.327	14.8106
100.394	14.8062
100.46	14.8093
100.527	14.8123
100.594	14.8054
100.66	14.8069
100.727	14.8053
100.794	14.8115
100.86	14.8091
100.927	14.8088
100.994	14.8099
101.06	14.8124
101.127	14.809
101.194	14.8074
101.26	14.8214

## Sheet: Panel E
Nucleosomes/Array (Estimated from compaction ratio and 5pN length of array)
49
57
69
22
54
51
51
57
30
85
11
28
36
23
8
42
29
16
34

## Sheet: Panel D,F,G
	See Dryad upload for raw data
	See Github for script to recreate figure
