# Supplementary figures and images for: ATP binding facilitates target search of SWR1 chromatin remodeler by promoting one-dimensional diffusion on DNA
Source: eLife journal article supplement (doi:10.7554/elife.77352), 2022-07-25

### Rotation Coupled

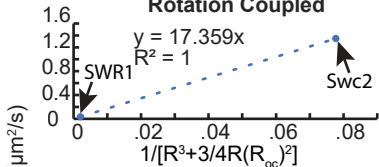

### Rotation Uncoupled

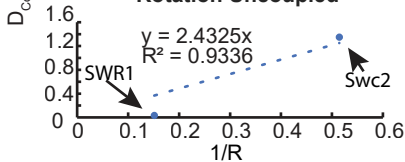

Supplement: supp [file elife-77352-supp-v1.zip]

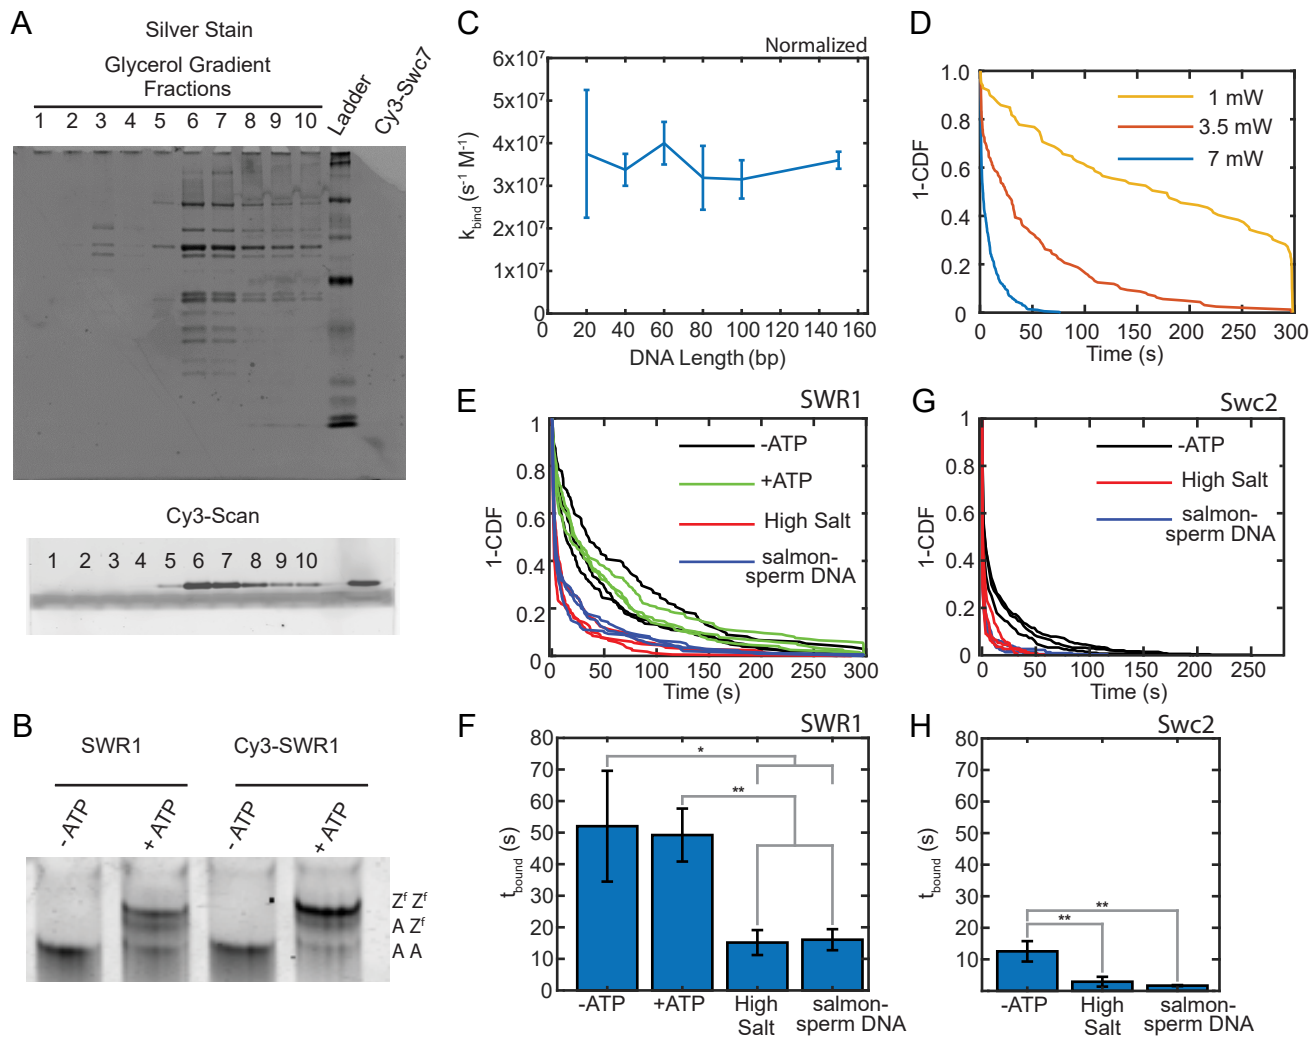

Supplement: supp [file elife-77352-supp-v1.zip]

A

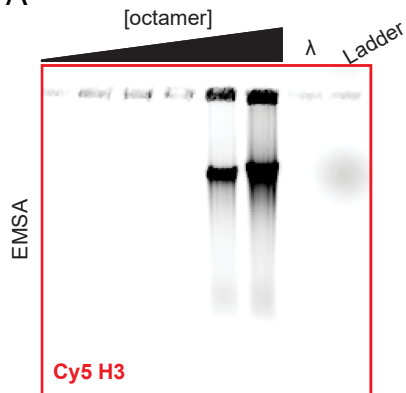

B

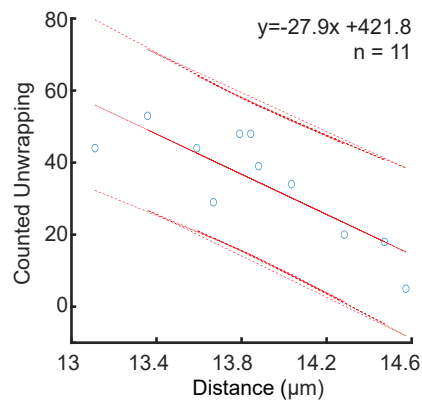

C

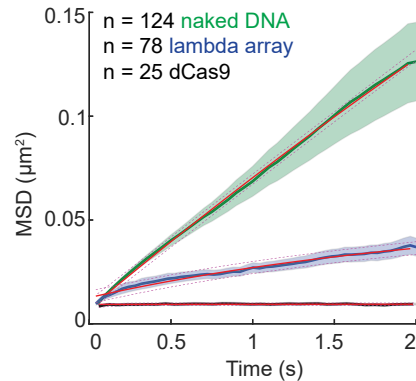

A

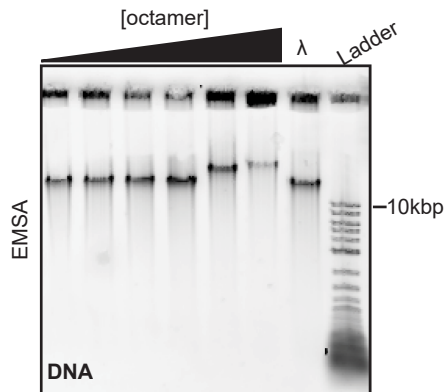

D

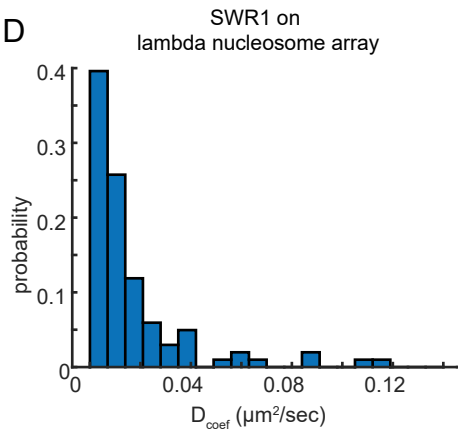

E

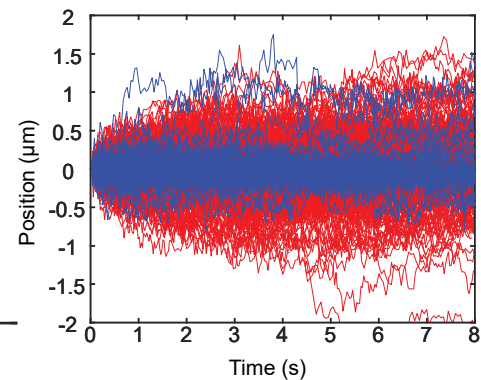

Supplement: supp [file elife-77352-supp-v1.zip]

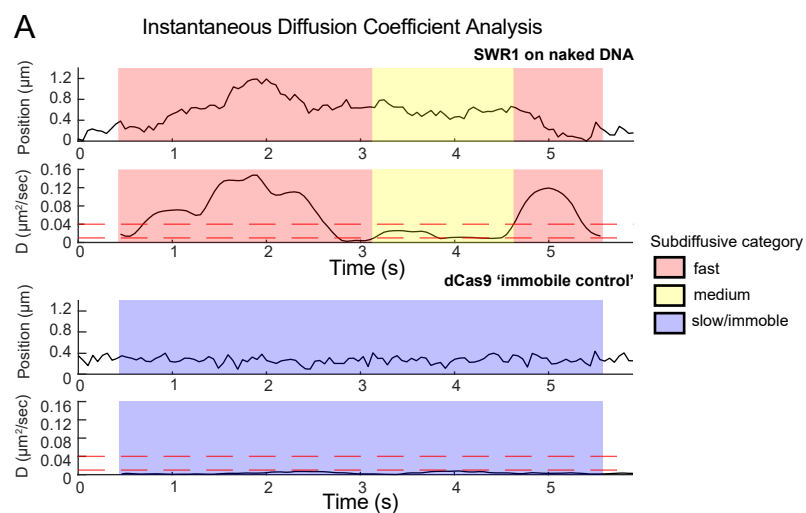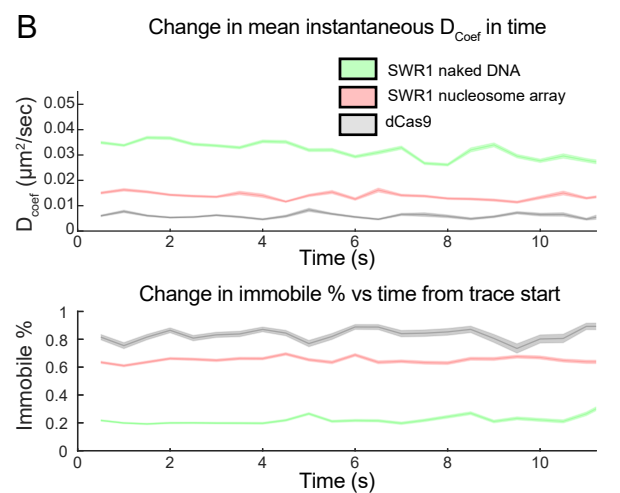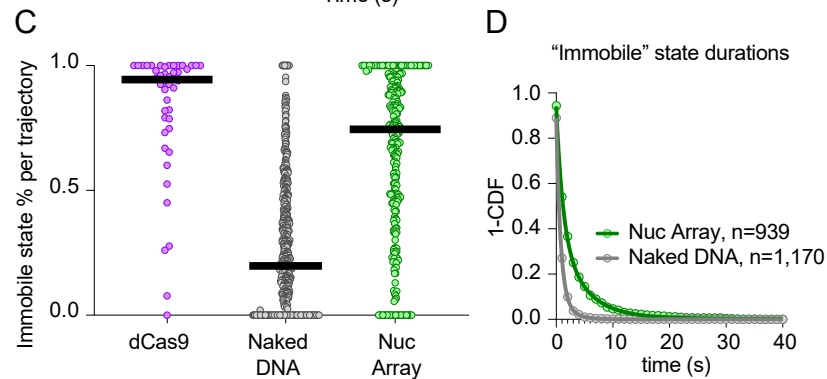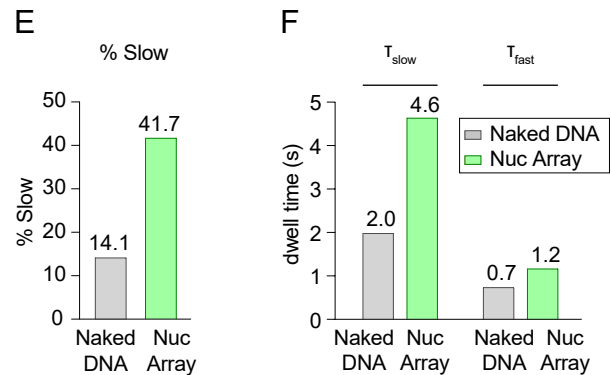

Supplement: supp [file elife-77352-supp-v1.zip]

# Coomassie Scan

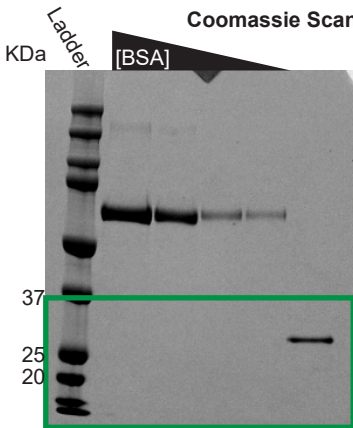

# Cy3 Scan

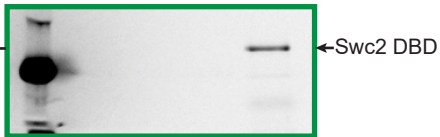

Supplement: supp [file elife-77352-supp-v1.zip]

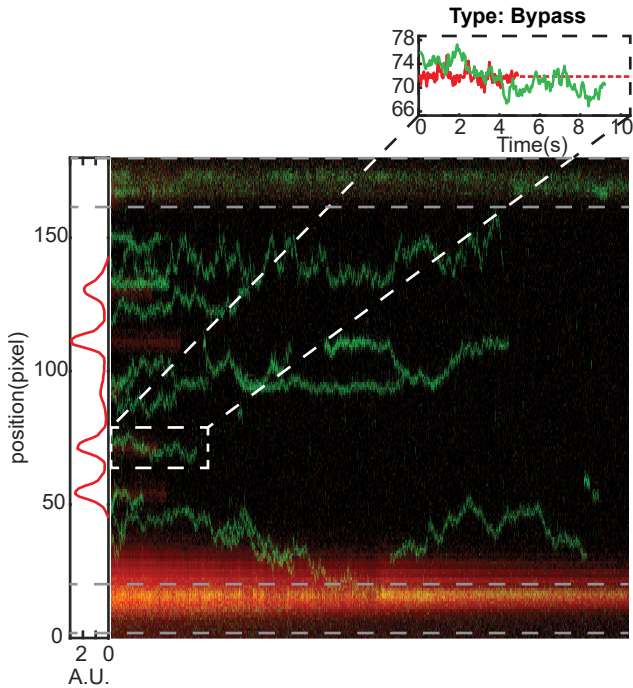

Supplement: supp [file elife-77352-supp-v1.zip]

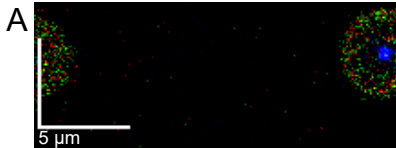

30 seconds in protein channel

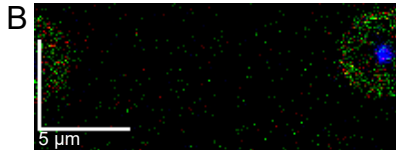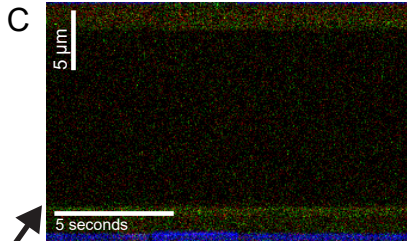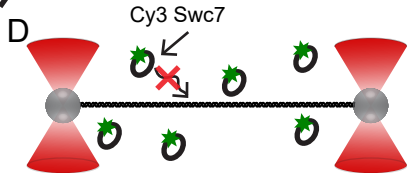

Supplement: supp [file elife-77352-supp-v1.zip]
